# Supplementary material for: Does Impedance Matter When Recording Spikes With Polytrodes?
Source: PubMed Central journal article supplement (PMC6188074; doi:10.3389/fnins.2018.00715), 2018-10-08
Supplement: Presentation_1.pdf [file Presentation_1.pdf]

## Supplementary Material

### Does impedance matter when recording spikes with polytrodes?

Joana P Neto\*, Pedro Baião, Gonçalo Lopes, João Frazão, Joana Nogueira, Elvira Fortunato, Pedro Barquinha, Adam R Kampff

\* Correspondence: Joana Neto: [j.neto@ucl.ac.uk](mailto:j.neto@ucl.ac.uk)

#### Commercial polytrode

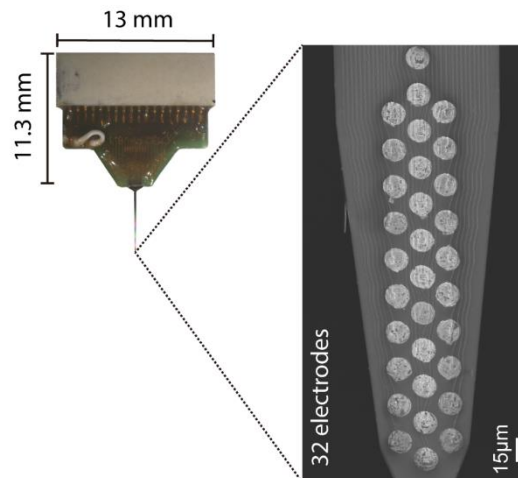

**Supplementary Figure 1.** Commercial polytrode containing 32 iridium electrodes (15  $\mu\text{m}$  diameter and 22-25  $\mu\text{m}$  inter-site pitch) arranged in a dense array. For noise and spikes amplitude characterization, sixteen electrodes were coated with PEDOT-PSS in a ‘chess board’ pattern. This allow us to directly compare, side-by-side, the same extracellular signals measured by PEDOT-coated microelectrodes (low impedance) with non-coated microelectrodes (high impedance).

## Acute recordings

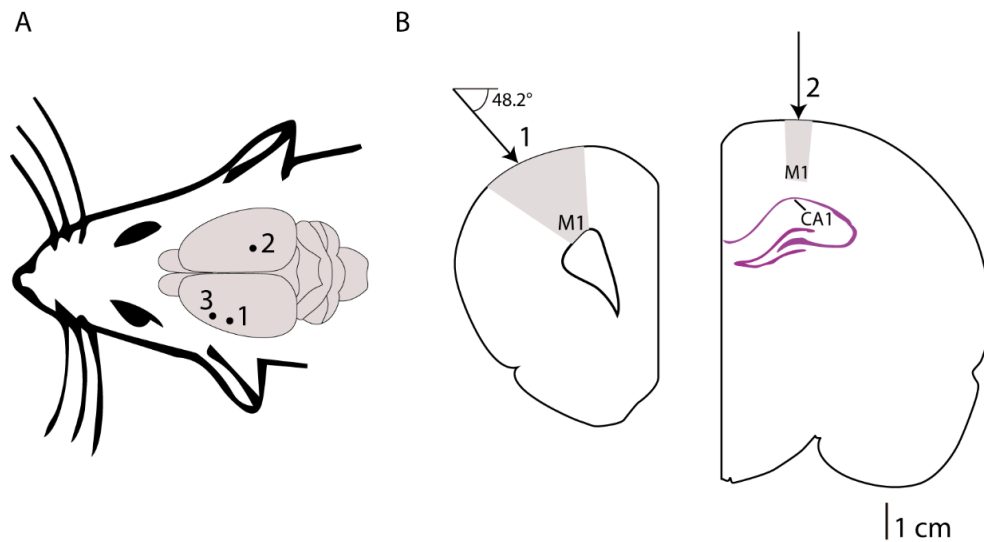

**Supplementary Figure 2.** Acute recordings performed with polytrodes containing 32 electrodes that are modified in a ‘chess board’ pattern. **(A)** Schematic of a rat brain signaling the probe insertion positions (black dots); **(B)** In the coronal slices the arrows represent the direction and position of probe at the insertion point. Under insertion points 1, 2 and 3 we recorded from primary motor cortex (M1). Under the insertion 2 we also recorded from hippocampus CA1. The estimated recording position in the brain was based on the depth (distance from the point of insertion to the bottom electrode in the array) and physiological signatures. The probe direction was similar in insertion 1 and 3.

## Dataset summary

| Filename                         | Depth<br>( $\mu\text{m}$ ) | Brain region<br>/Anaesthesia | Number<br>of<br>putative<br>neurons | Probe<br>ID | Animal<br>ID | AP<br>(mm) |
|----------------------------------|----------------------------|------------------------------|-------------------------------------|-------------|--------------|------------|
| amplifier2015-05-05T17_20_09.bin | —                          | Short-circuit                | —                                   |             |              |            |
| amplifier2015-05-11T11_59_54.bin | —                          | Saline solution              | —                                   | P1          |              |            |
| amplifier2017-02-02T10_30_29.bin | —                          | Saline solution              | —                                   | P2          |              |            |
| amplifier2016-11-01T19_59_18.bin | —                          | Saline solution              | —                                   | P3          |              |            |
| amplifier2017-02-02T14_38_11.bin | 715                        | M1 / urethane                | 1                                   | P2          | A            | 3.1        |
| amplifier2017-02-02T15_03_44.bin | 915                        | M1 / urethane                | 6                                   | P2          | A            | 3.1        |
| amplifier2017-02-02T15_49_35.bin | 1245                       | M1 / urethane                | 5                                   | P2          | A            | 3.1        |
| amplifier2017-02-02T16_57_16.bin | 2149                       | Hippocampus<br>CA1/ urethane | 6                                   | P2          | A            | 3.1        |
| amplifier2017-02-02T17_18_46.bin | 2243                       | Hippocampus<br>CA1/ urethane | 5                                   | P2          | A            | 3.1        |
| amplifier2014-11-13T14_59_40.bin | 400                        | M1 / ketamine                | 9                                   | P1          | B            | 3.4        |
| amplifier2014-11-13T15_35_31.bin | 700                        | M1 / ketamine                | 17                                  | P1          | B            | 3.4        |

|                                  |      |               |    |    |   |     |
|----------------------------------|------|---------------|----|----|---|-----|
| amplifier2014-11-13T18_05_50.bin | 1100 | M1 / ketamine | 24 | P1 | B | 3.4 |
| amplifier2014-11-25T20_32_48.bin | 1300 | M1 / ketamine | 11 | P1 | C | 3.2 |
| amplifier2014-11-25T21_27_13.bin | 1400 | M1 / ketamine | 7  | P1 | C | 3.2 |
| amplifier2014-11-25T23_00_08.bin | 1300 | M1 / ketamine | 12 | P1 | C | 3.2 |

**Supplementary Table 1.** For each recording (i.e., filename), we described the distance (depth) from the brain surface to the bottom electrode in the array, the estimated recorded brain region (M1 or CA1), the anaesthesia (ketamine or urethane), the number of putative neurons sorted for each recording, the probe and animal identification (ID), and the anterior-posterior (AP) distance relative to bregma for each recording. Acute recordings from anesthetized rats are approximately 10 to 15 minutes long. Additionally, the recordings used to calculate the noise in saline and the electronic noise due to the amplifier contribution are also presented. This dataset is available online (<http://www.kampff-lab.org/polytrode-impedance/>). M1 denotes primary motor cortex and CA1 an hippocampal area.

# Putative neurons

2014-11-13T14\_59\_40.bin

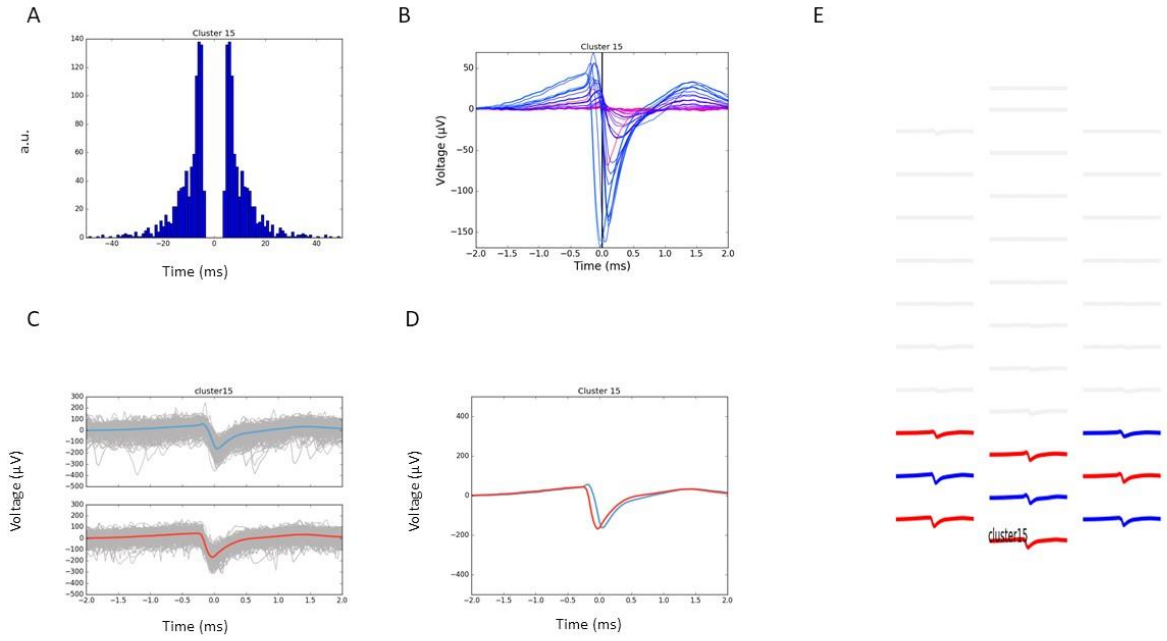

2014-11-13T14\_59\_40.bin

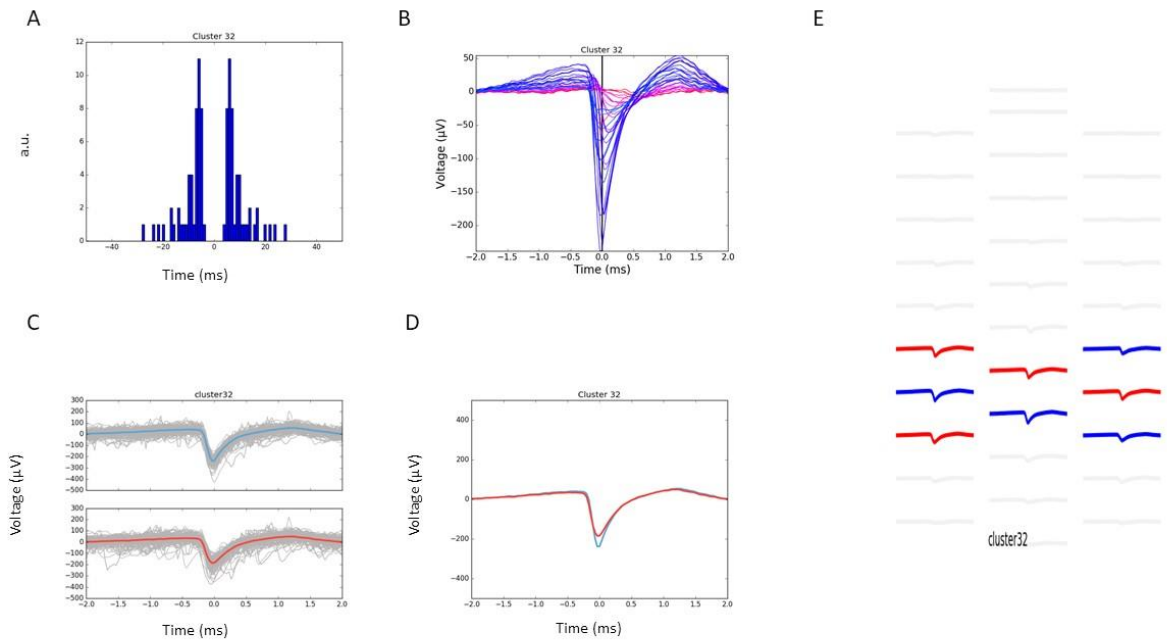

2014-11-13T14\_59\_40.bin

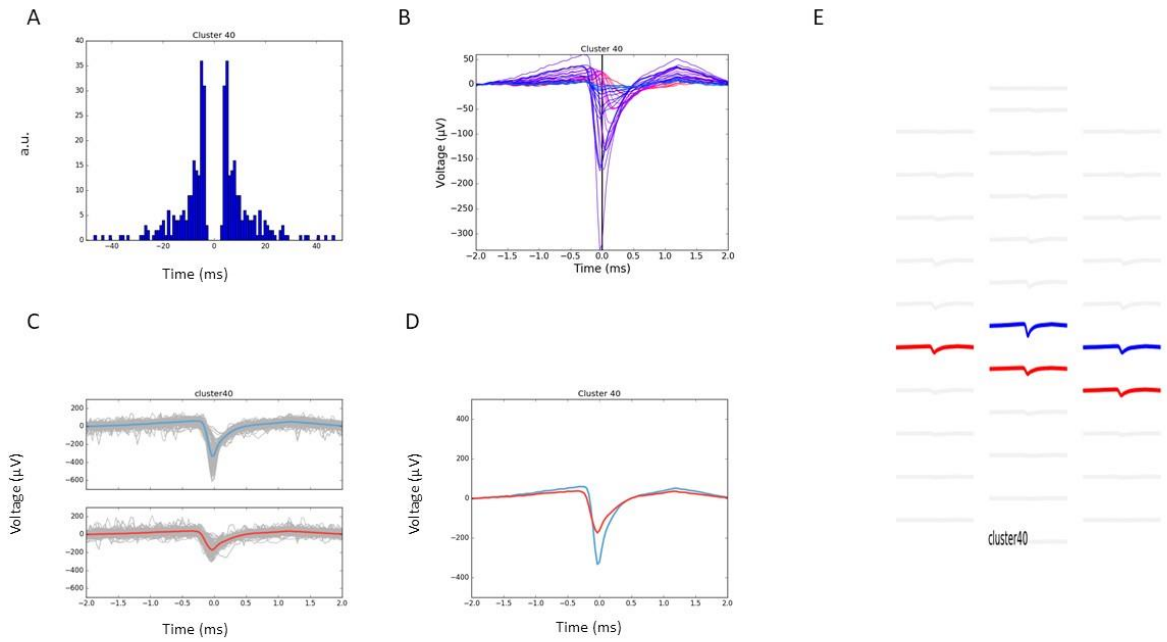

2014-11-13T14\_59\_40.bin

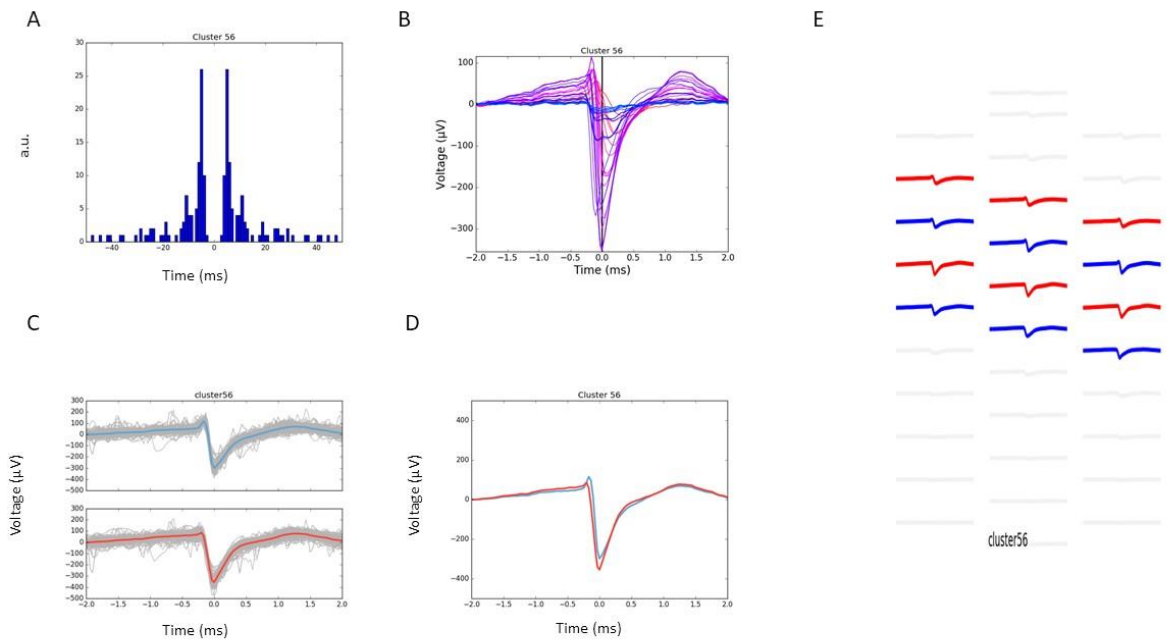

2014-11-13T14\_59\_40.bin

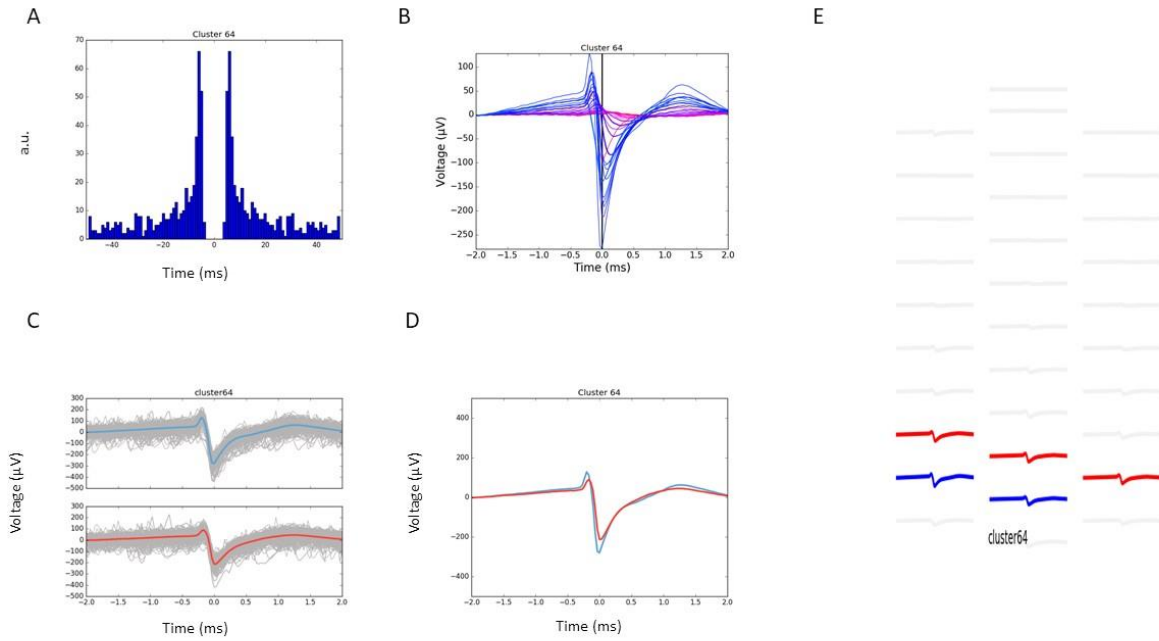

2014-11-13T14\_59\_40.bin

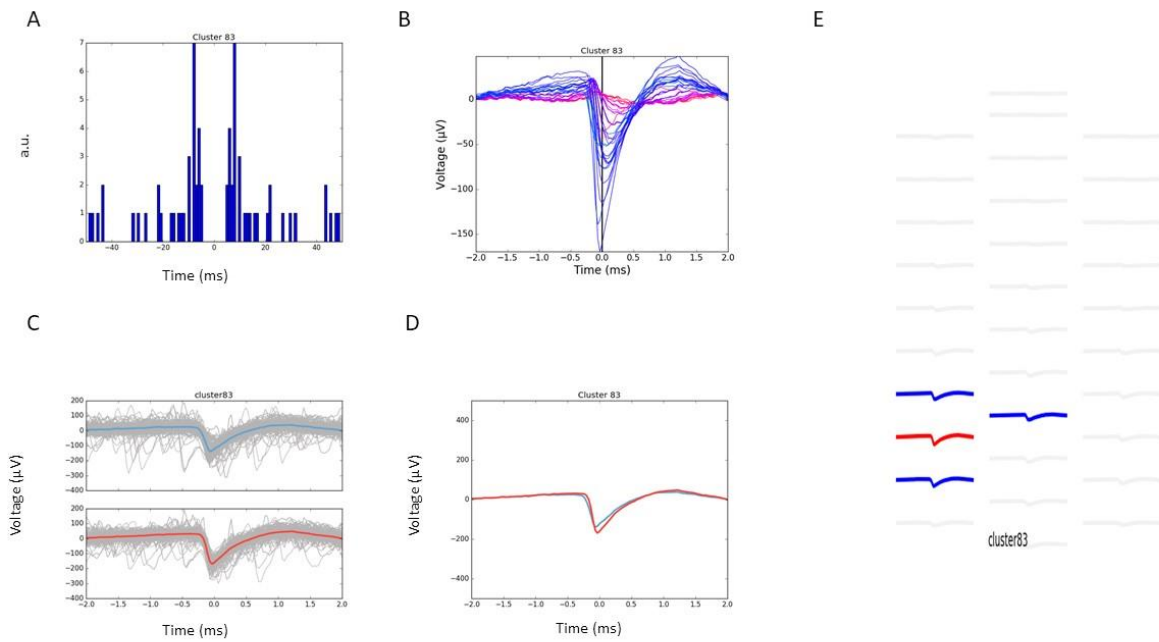

2014-11-13T14\_59\_40.bin

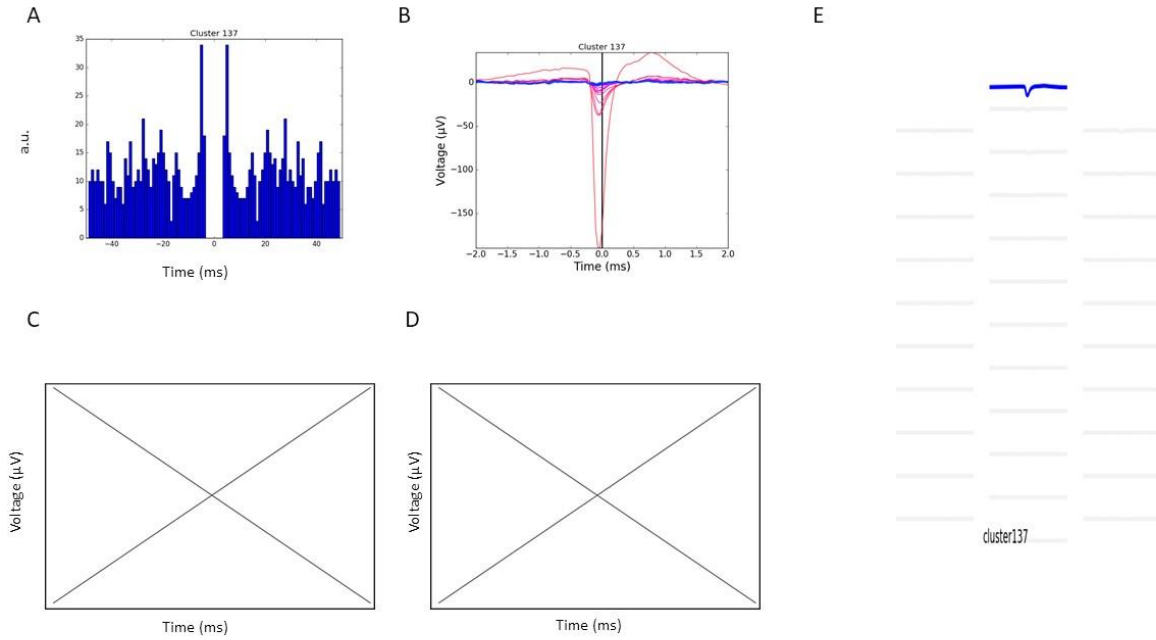

2014-11-13T14\_59\_40.bin

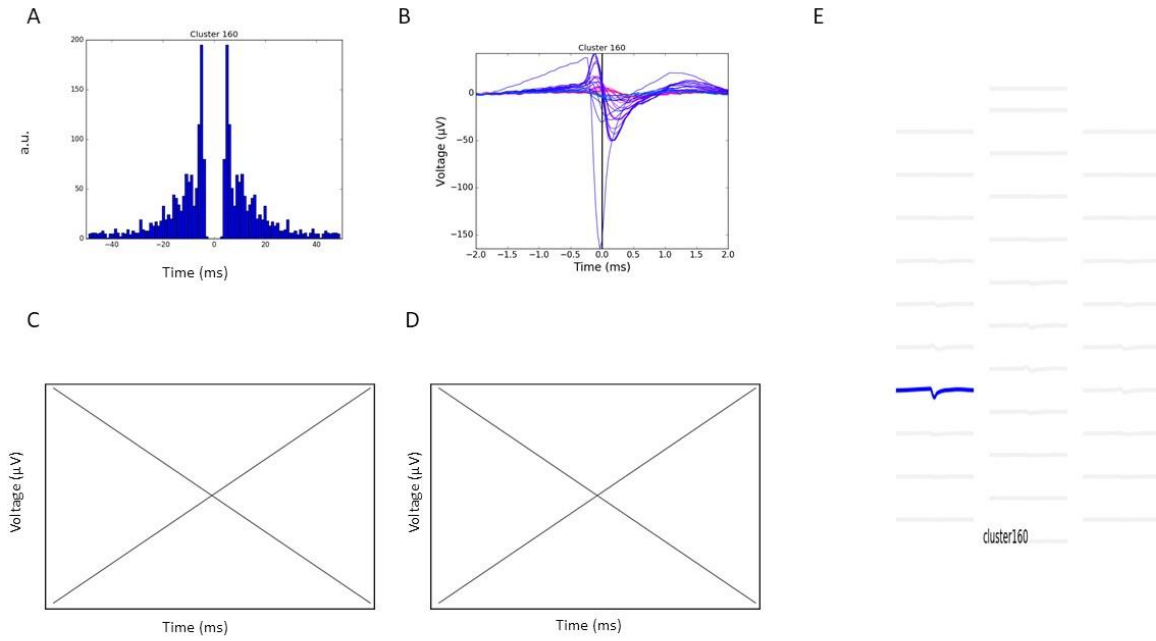



2014-11-13T14\_59\_40.bin

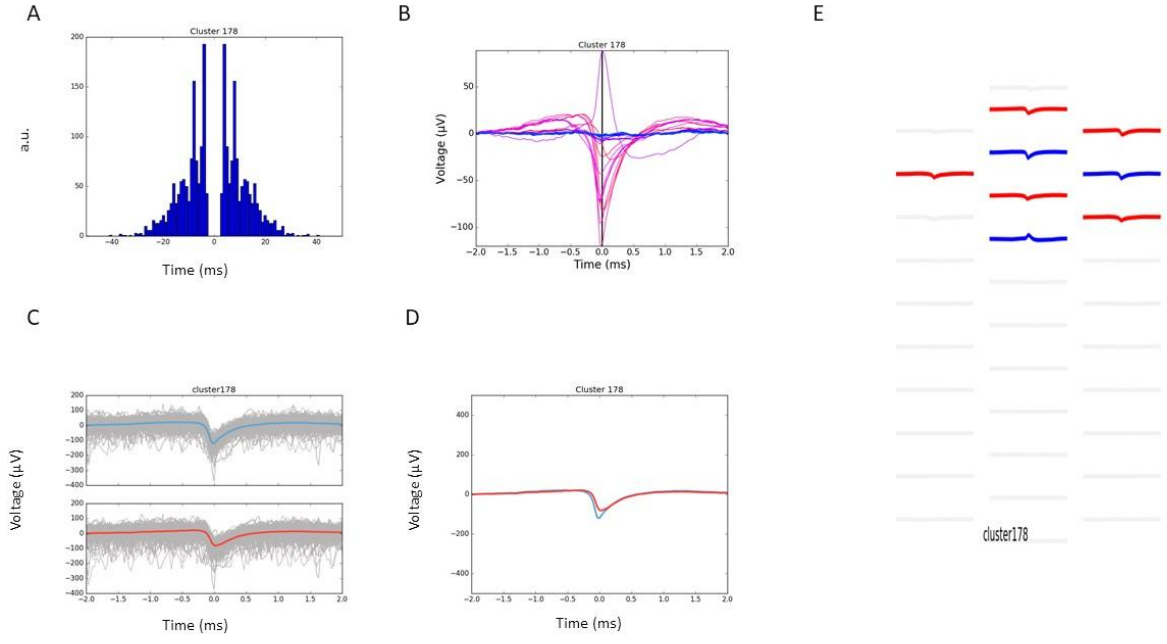

2014-11-13T15\_35\_31.bin

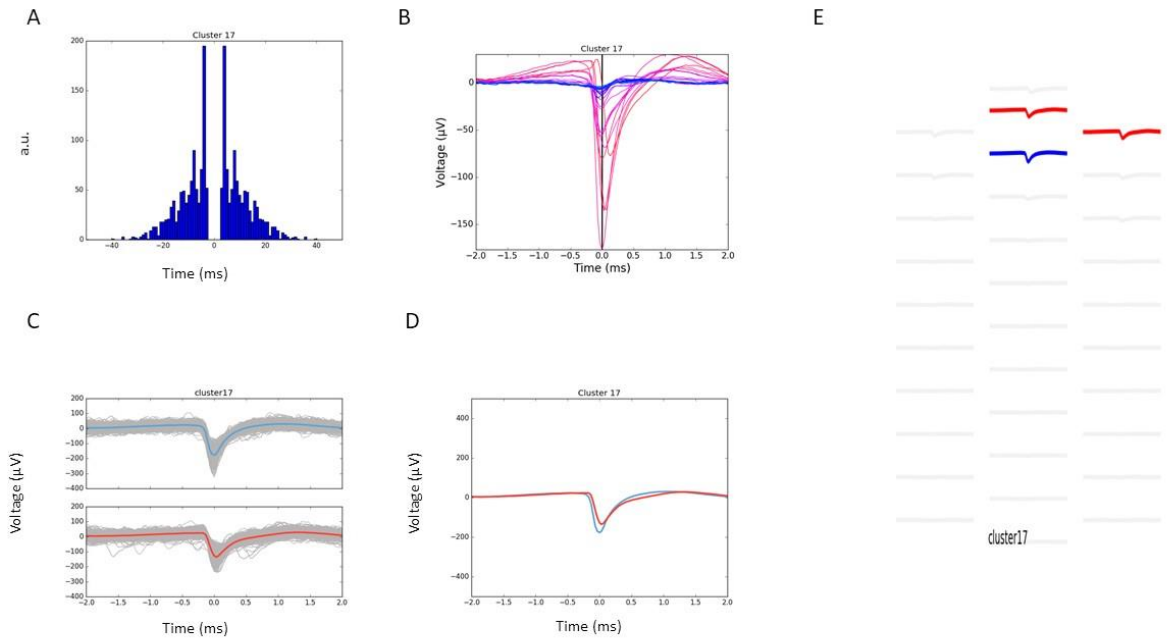

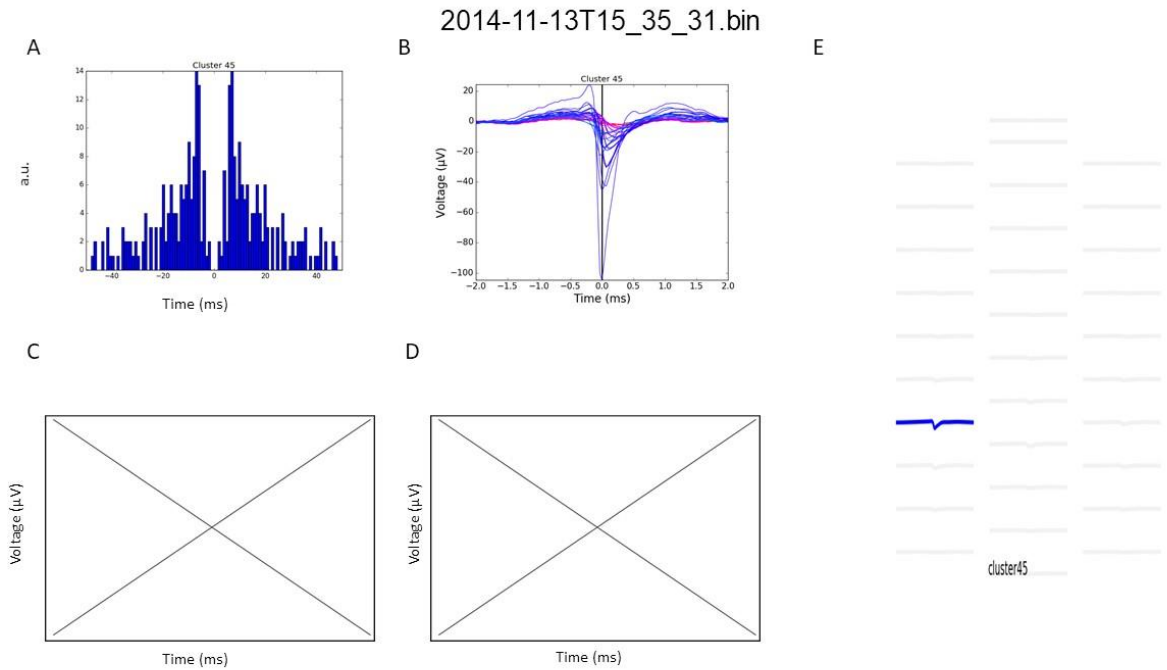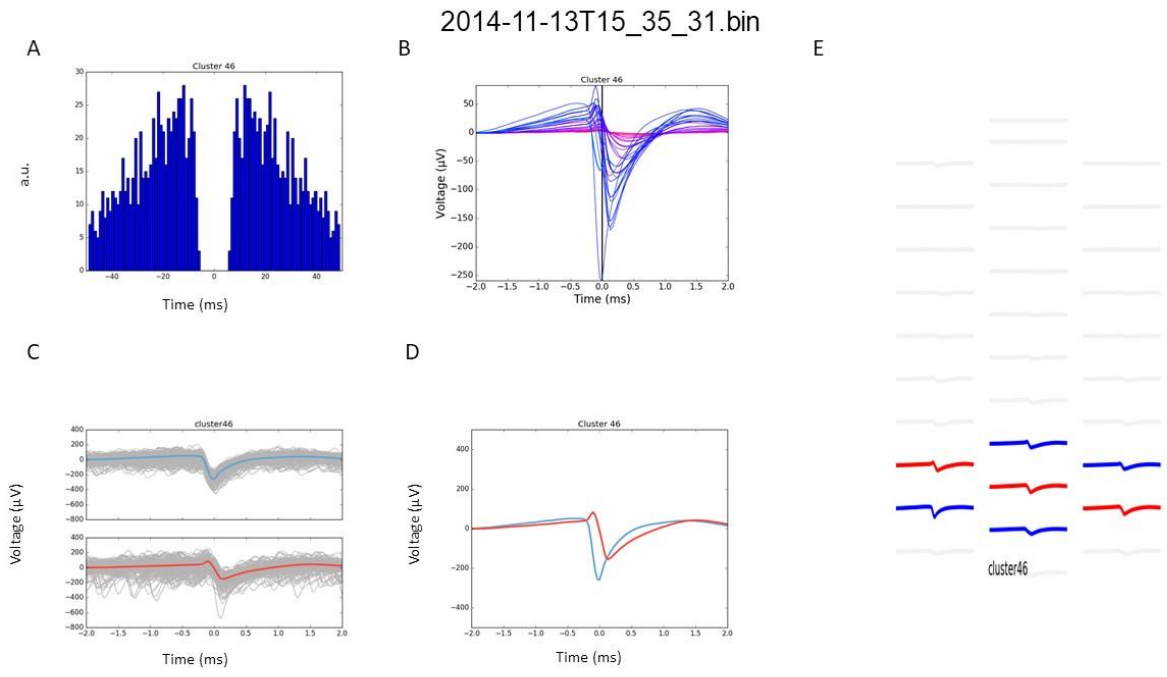

2014-11-13T15\_35\_31.bin

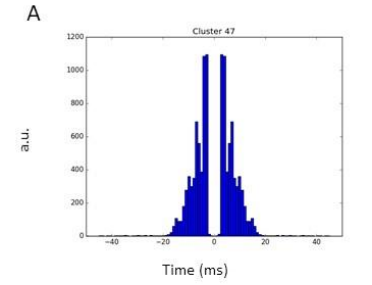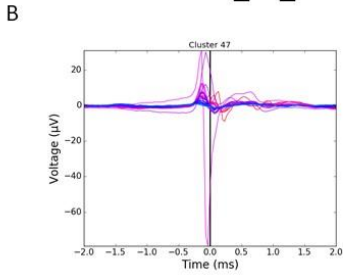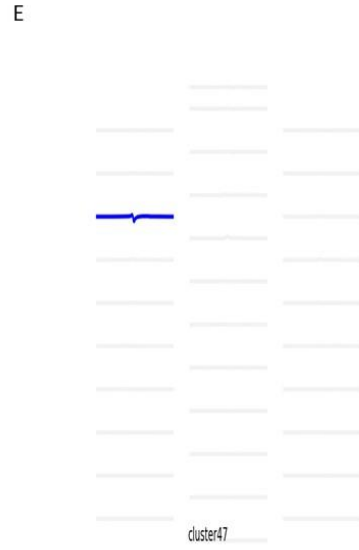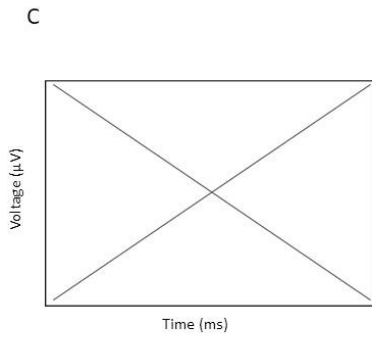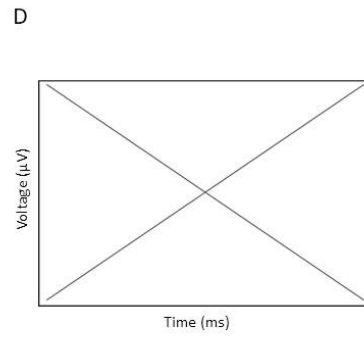

2014-11-13T15\_35\_31.bin

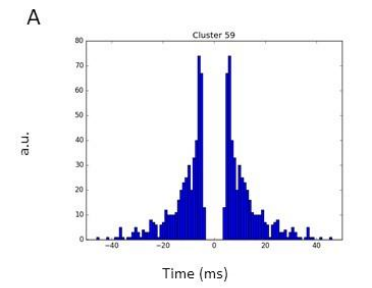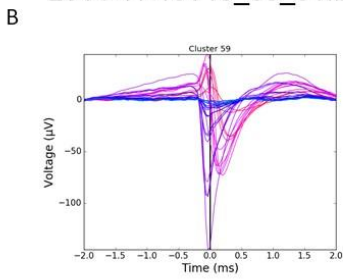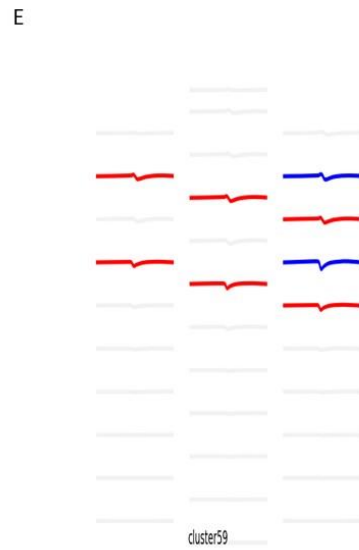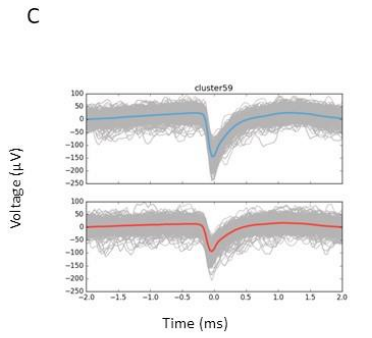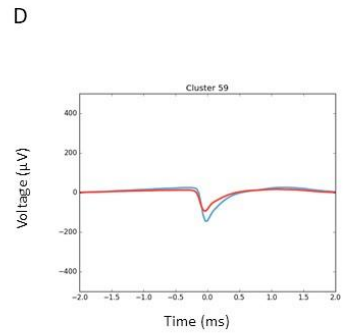

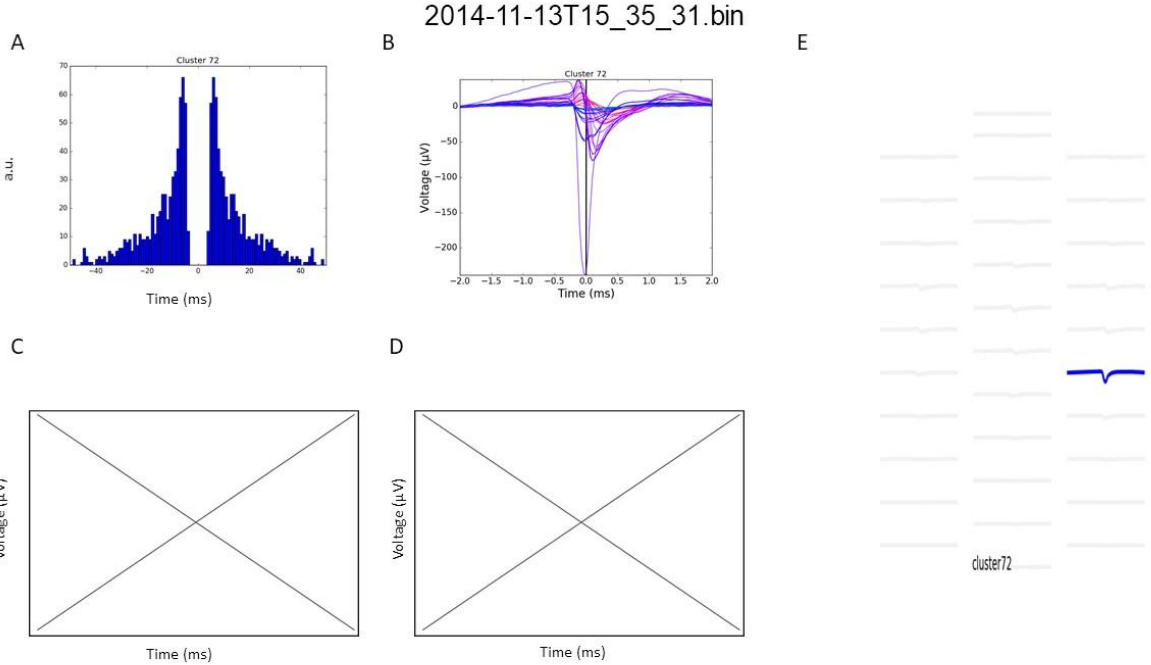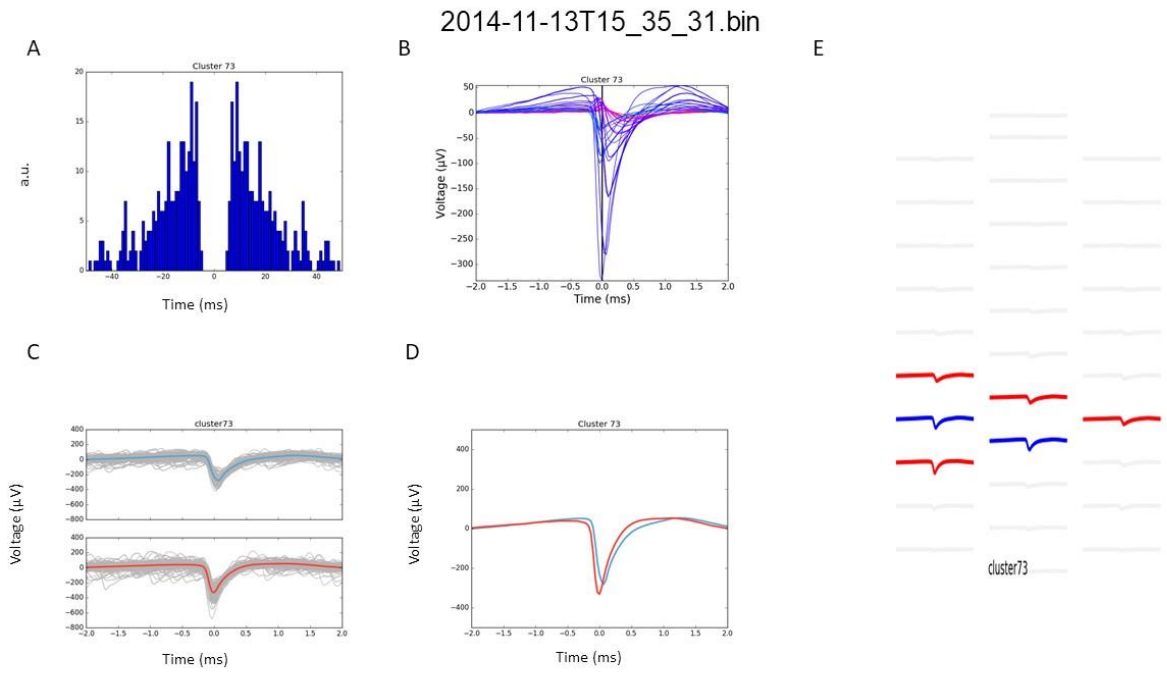

2014-11-13T15\_35\_31.bin

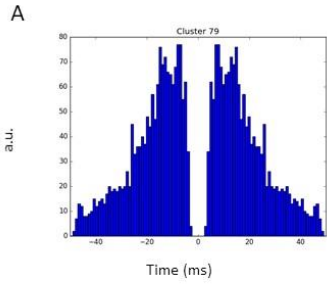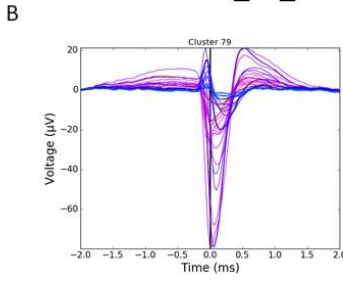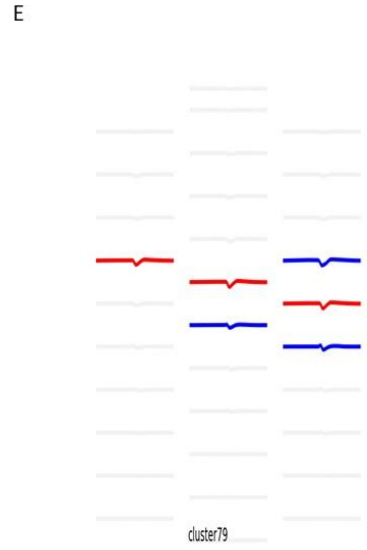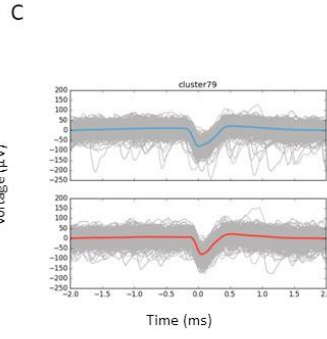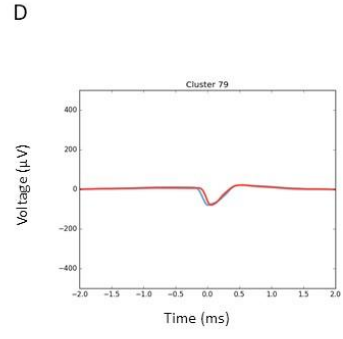

2014-11-13T15\_35\_31.bin

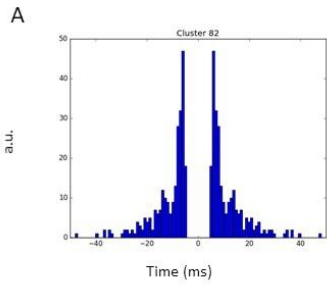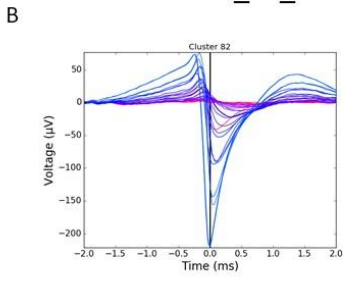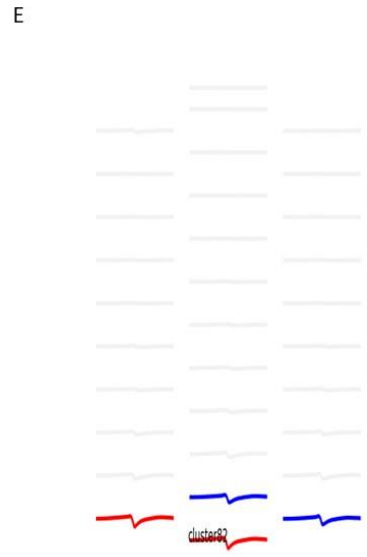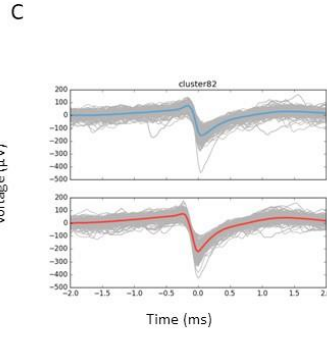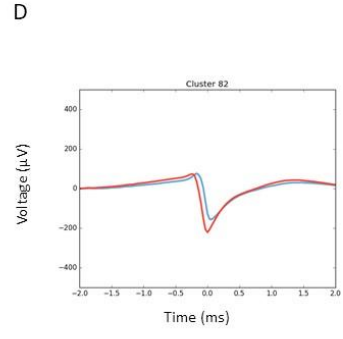

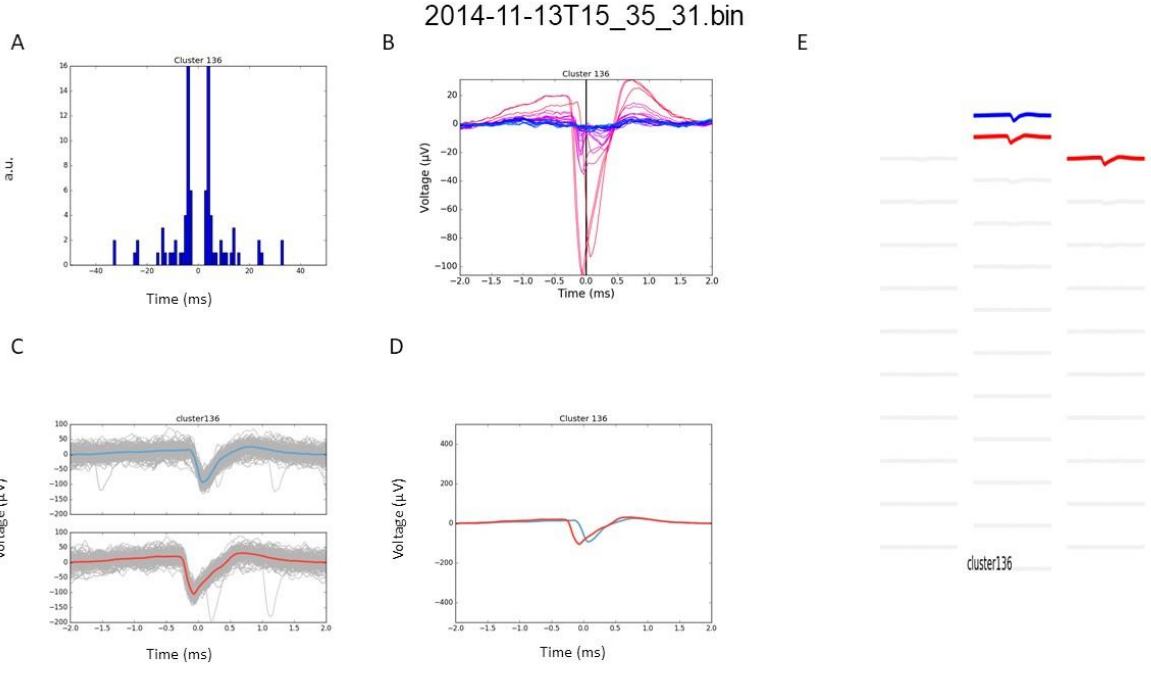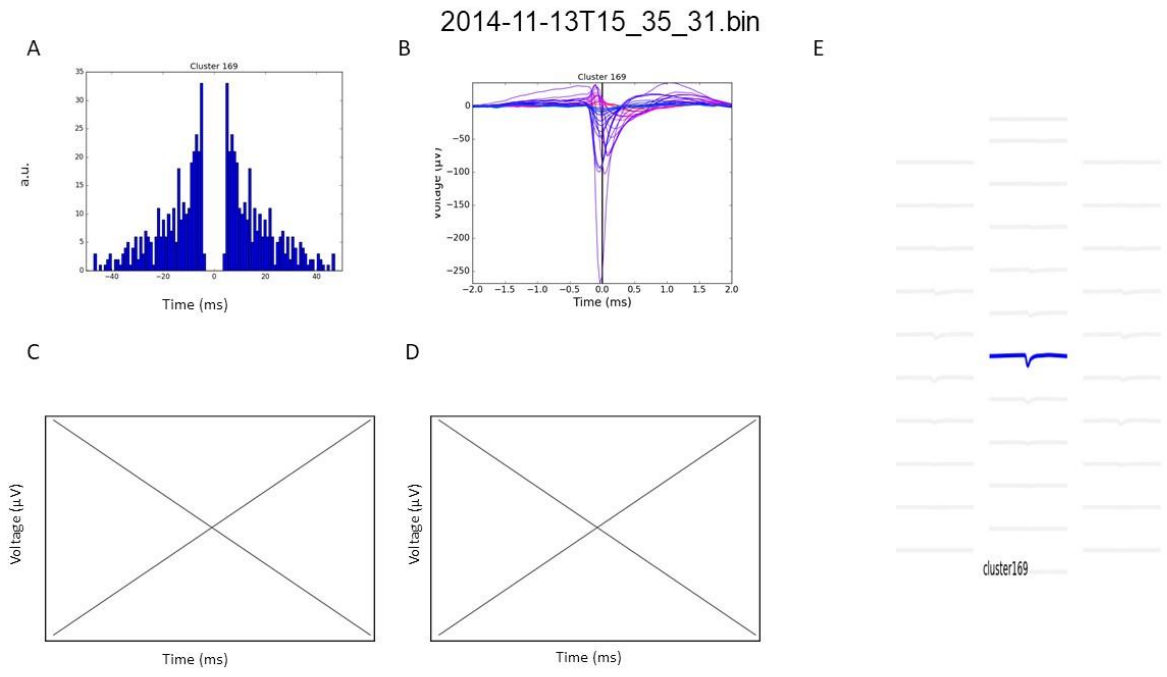

2014-11-13T15\_35\_31.bin

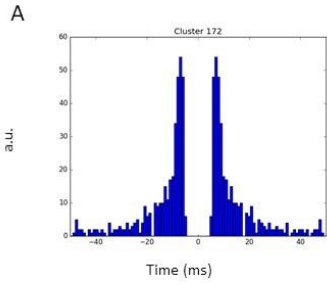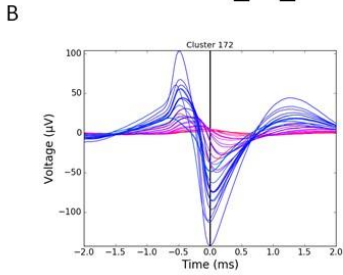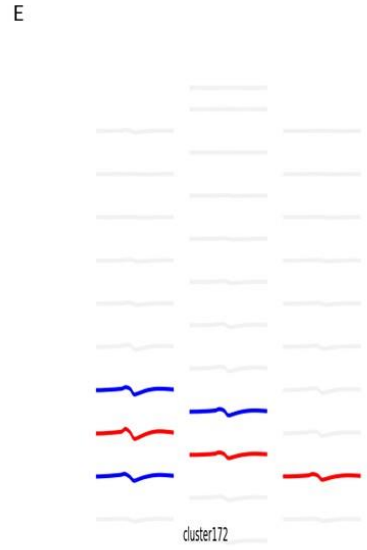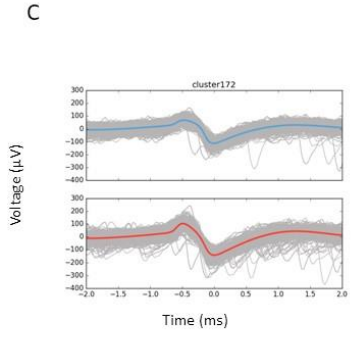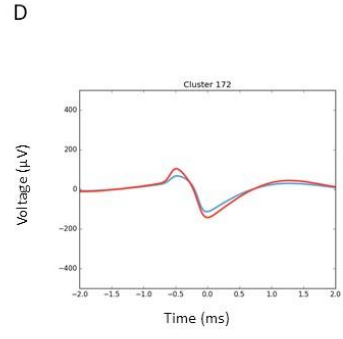

2014-11-13T15\_35\_31.bin

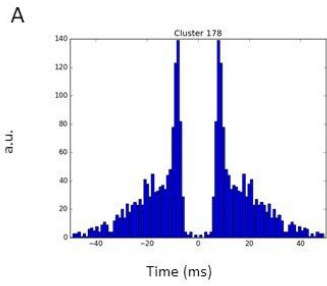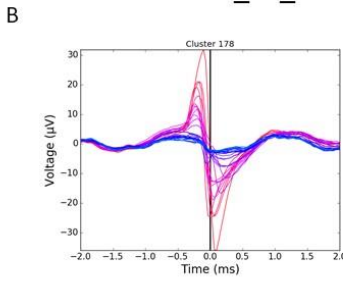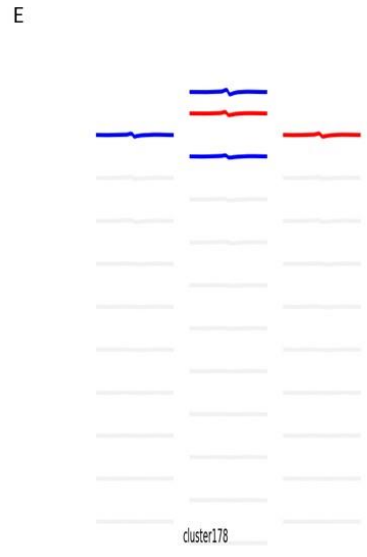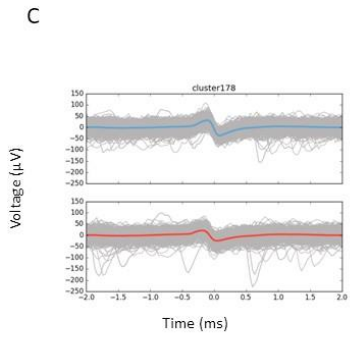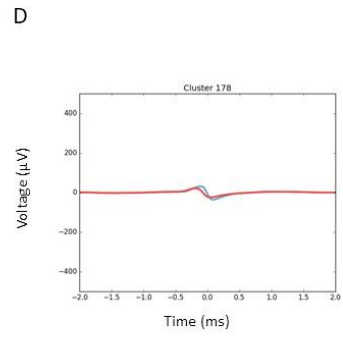

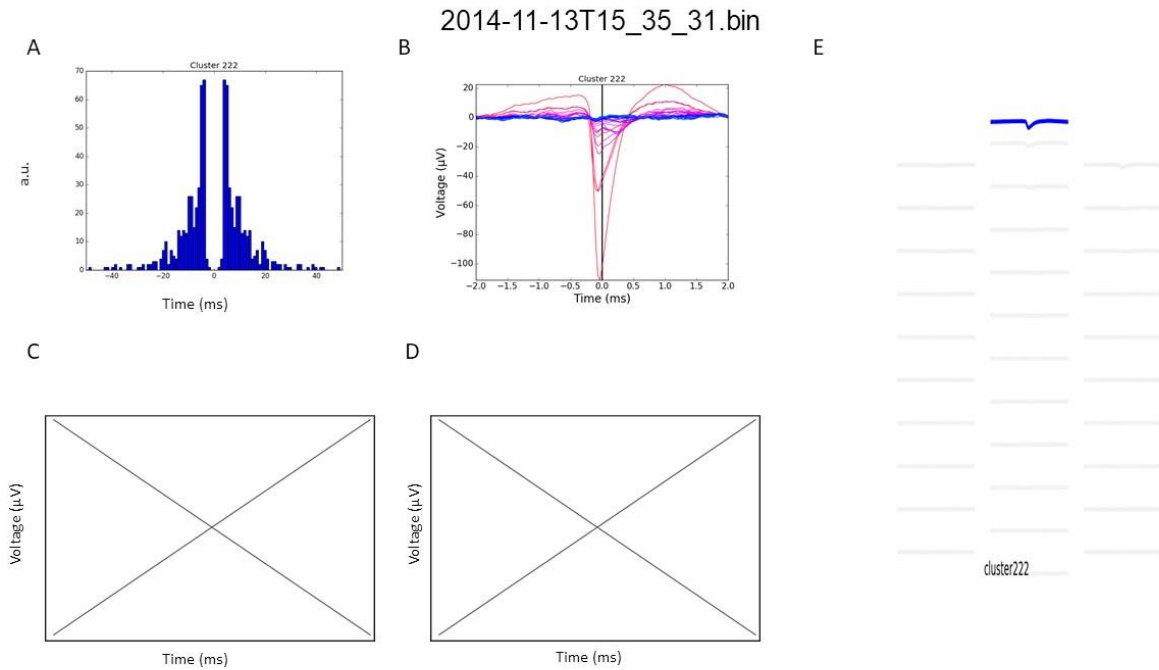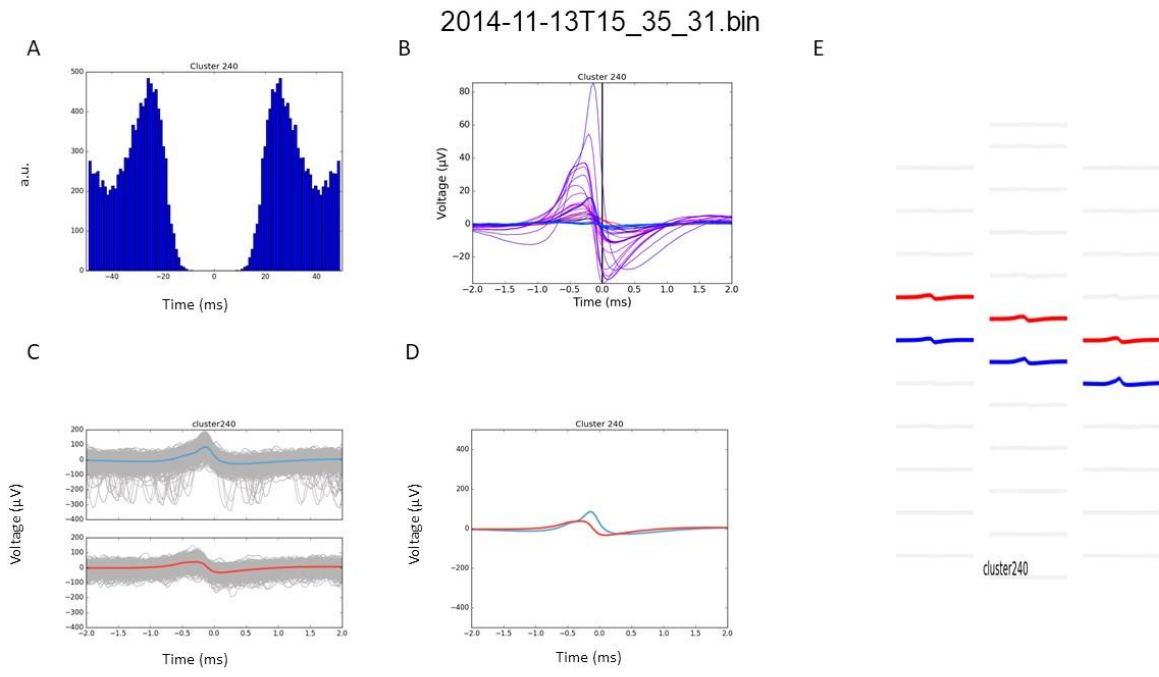



2014-11-13T15\_35\_31.bin

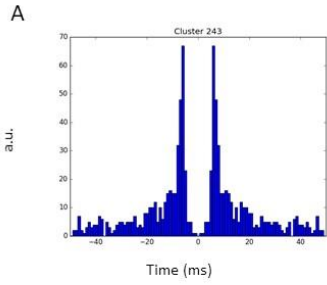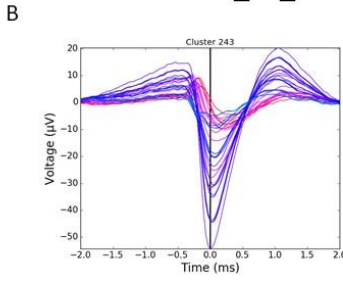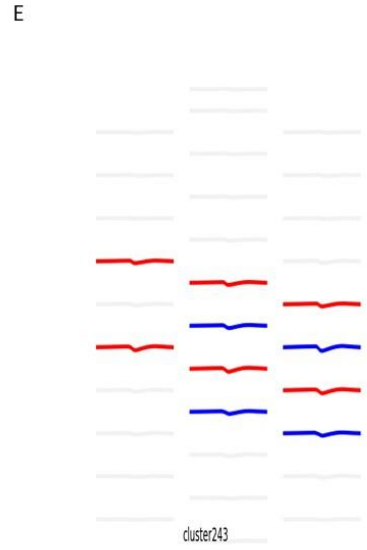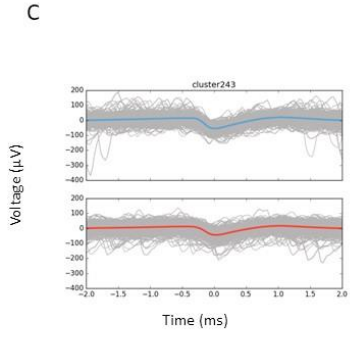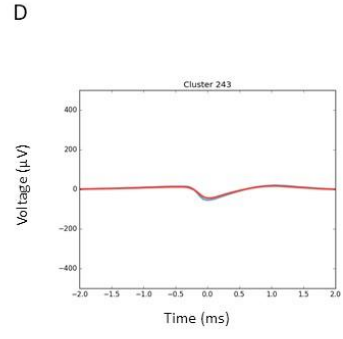

2014-11-13T15\_35\_31.bin

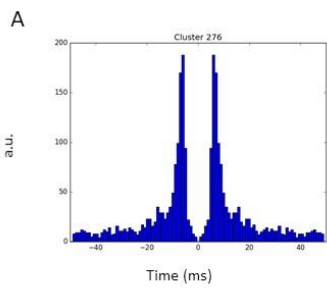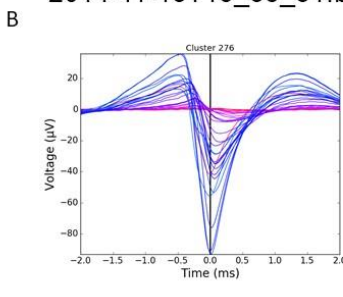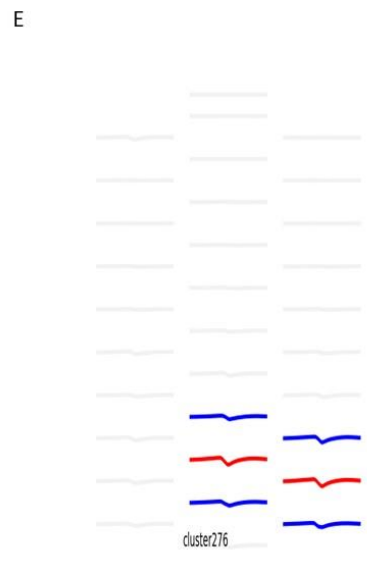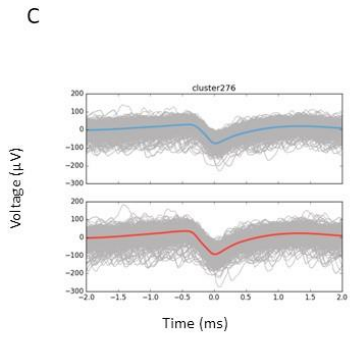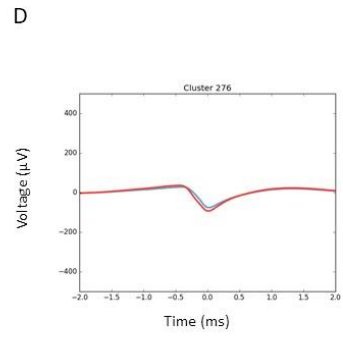

2014-11-13T18\_05\_50.bin

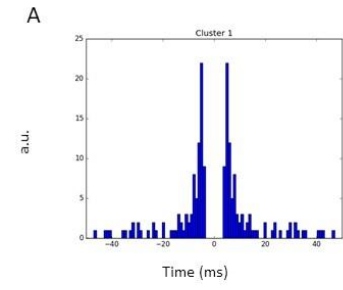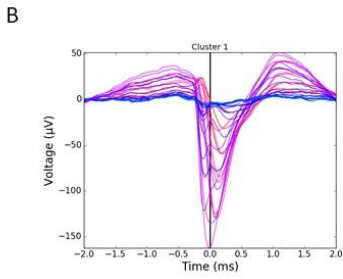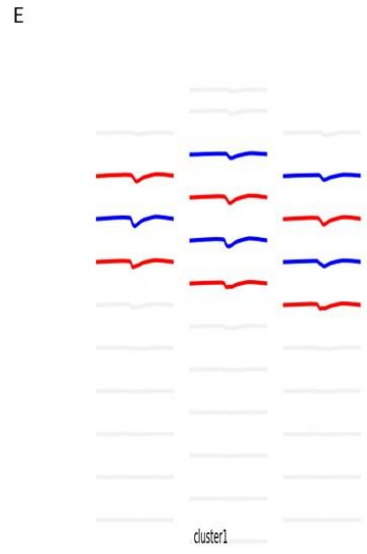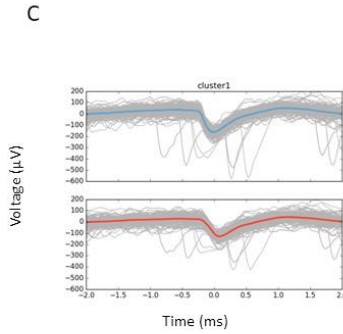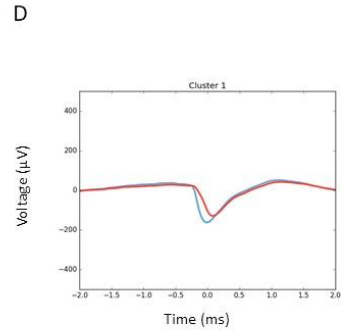

2014-11-13T18\_05\_50.bin

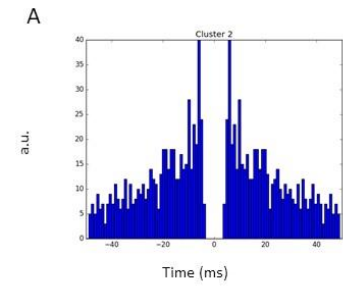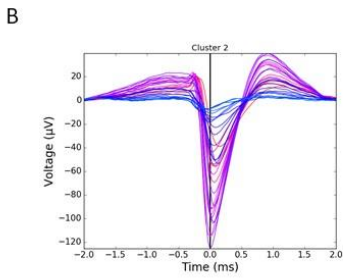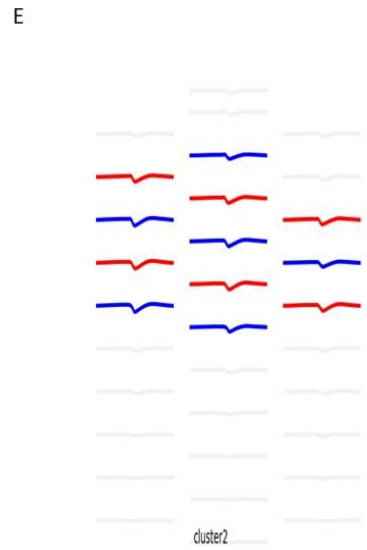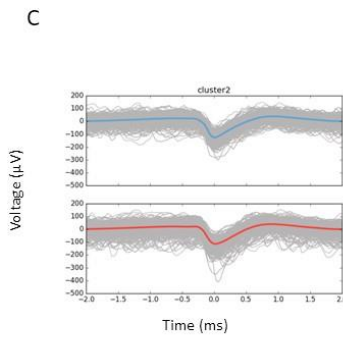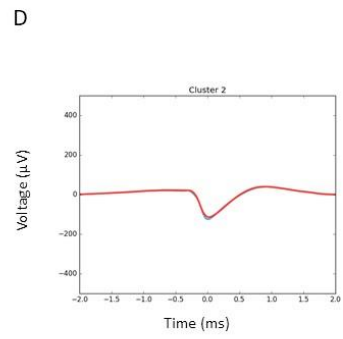

2014-11-13T18\_05\_50.bin

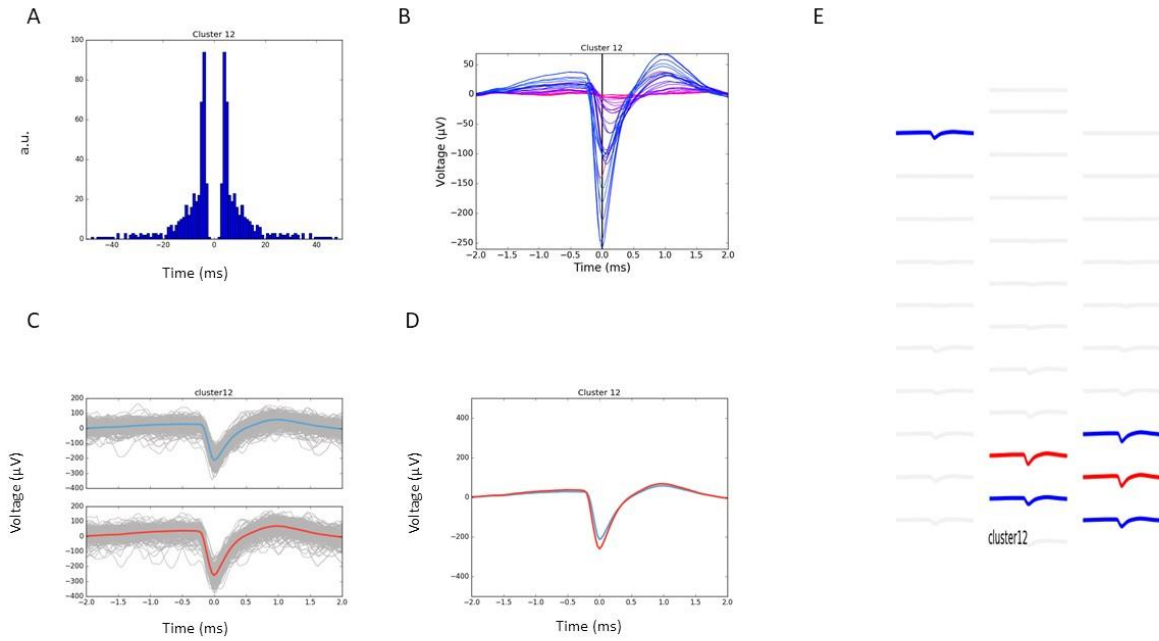

2014-11-13T18\_05\_50.bin

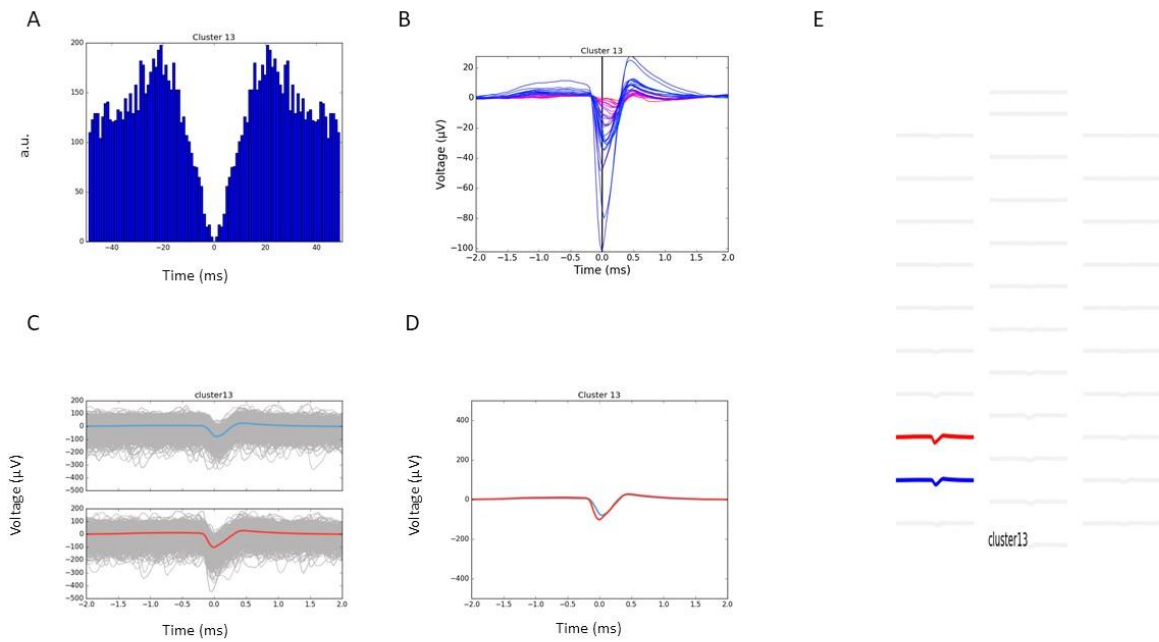

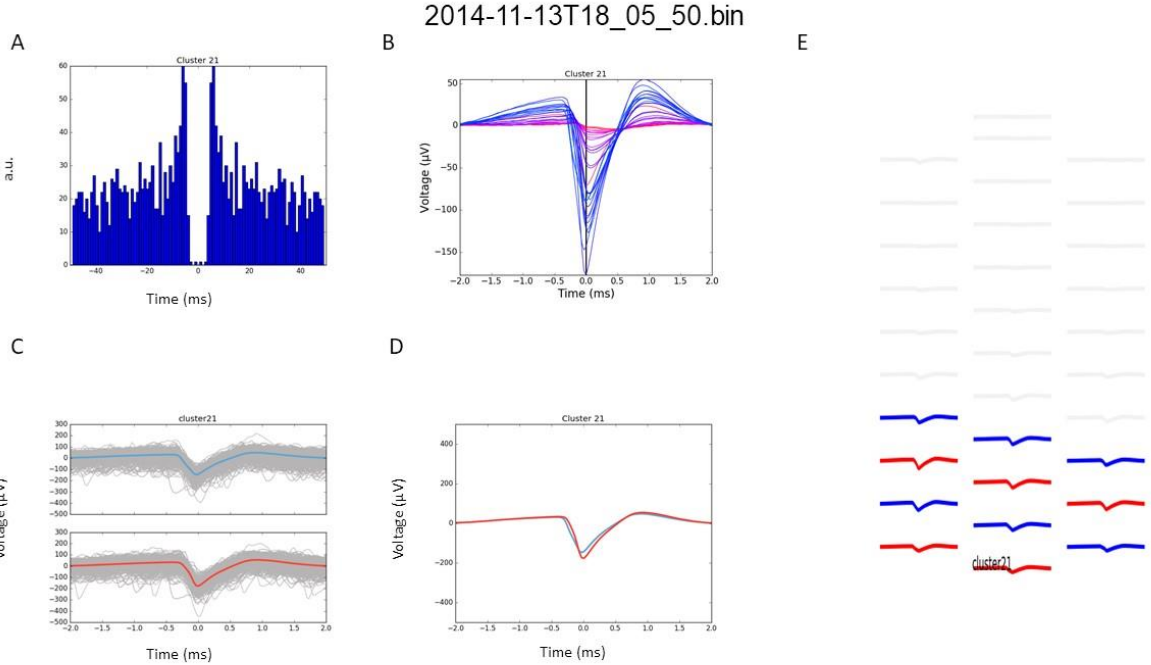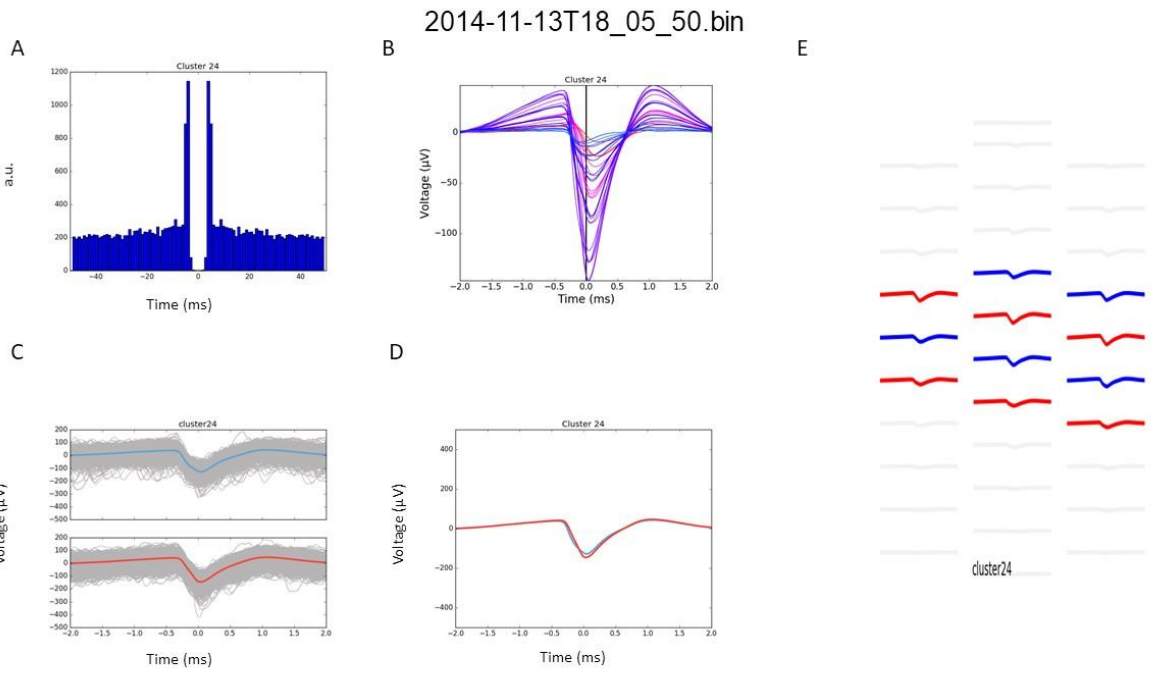

2014-11-13T18\_05\_50.bin

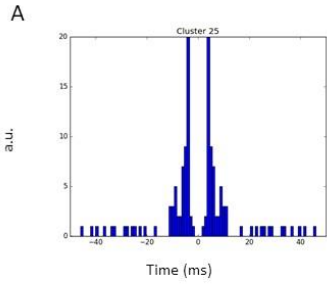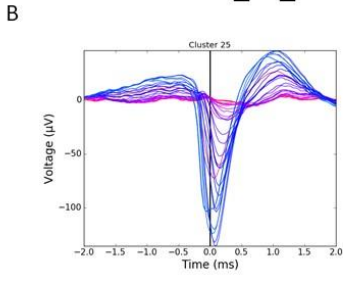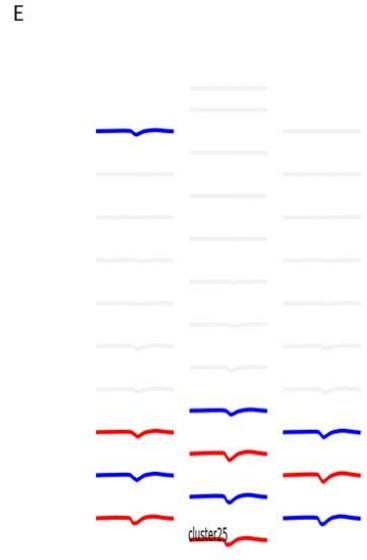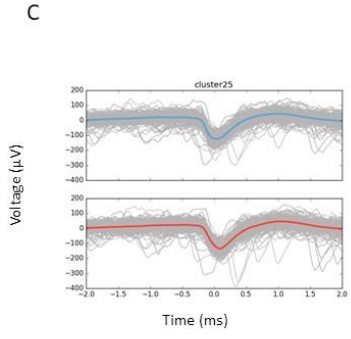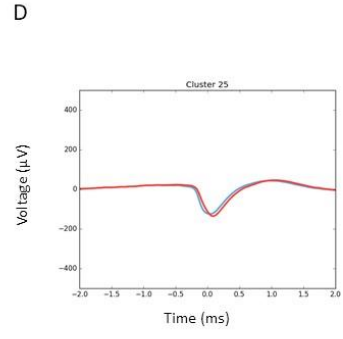

2014-11-13T18\_05\_50.bin

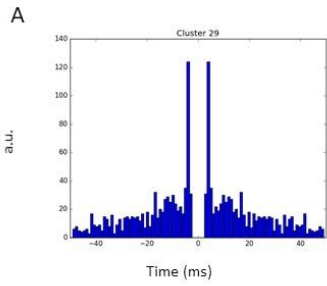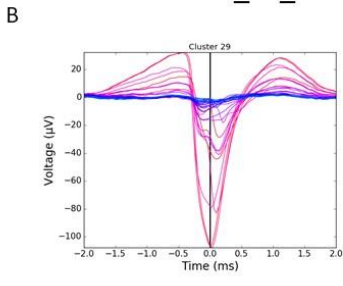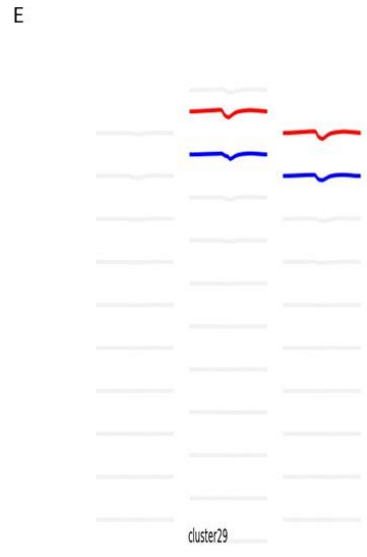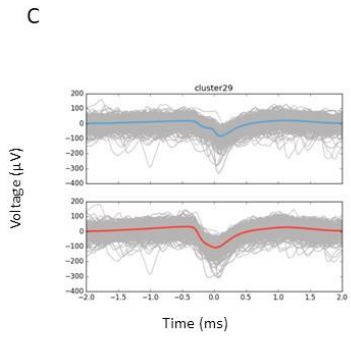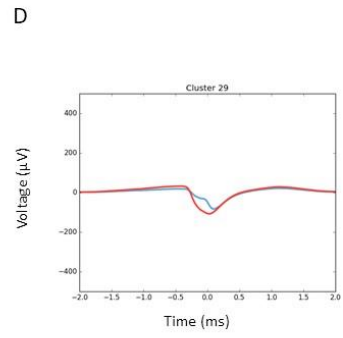

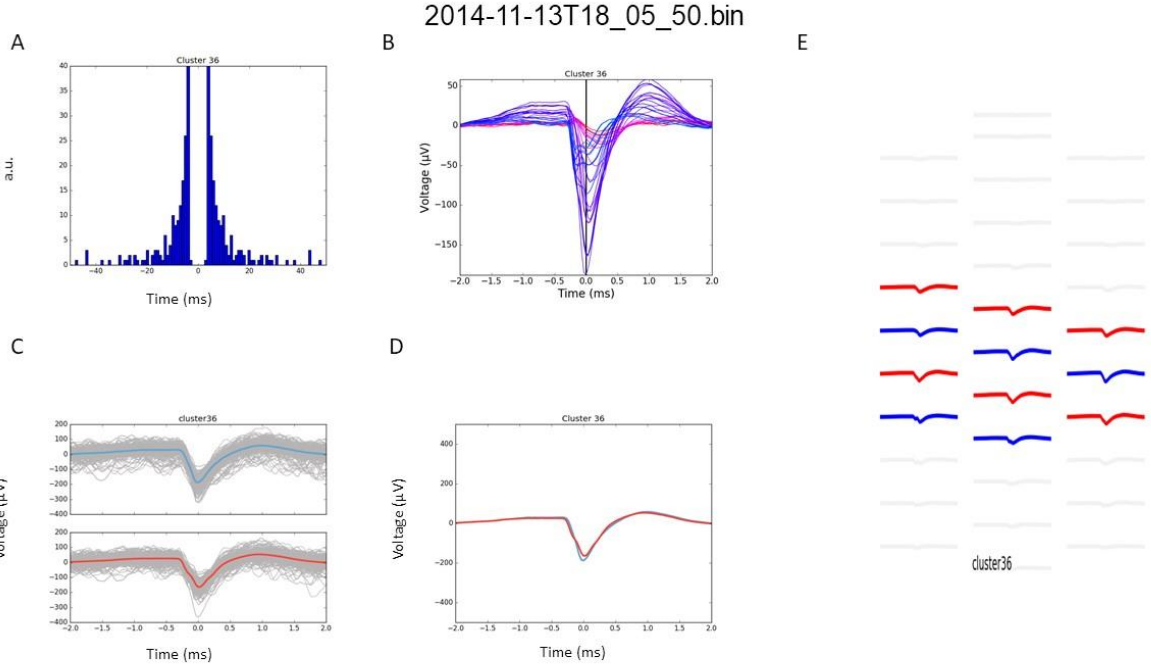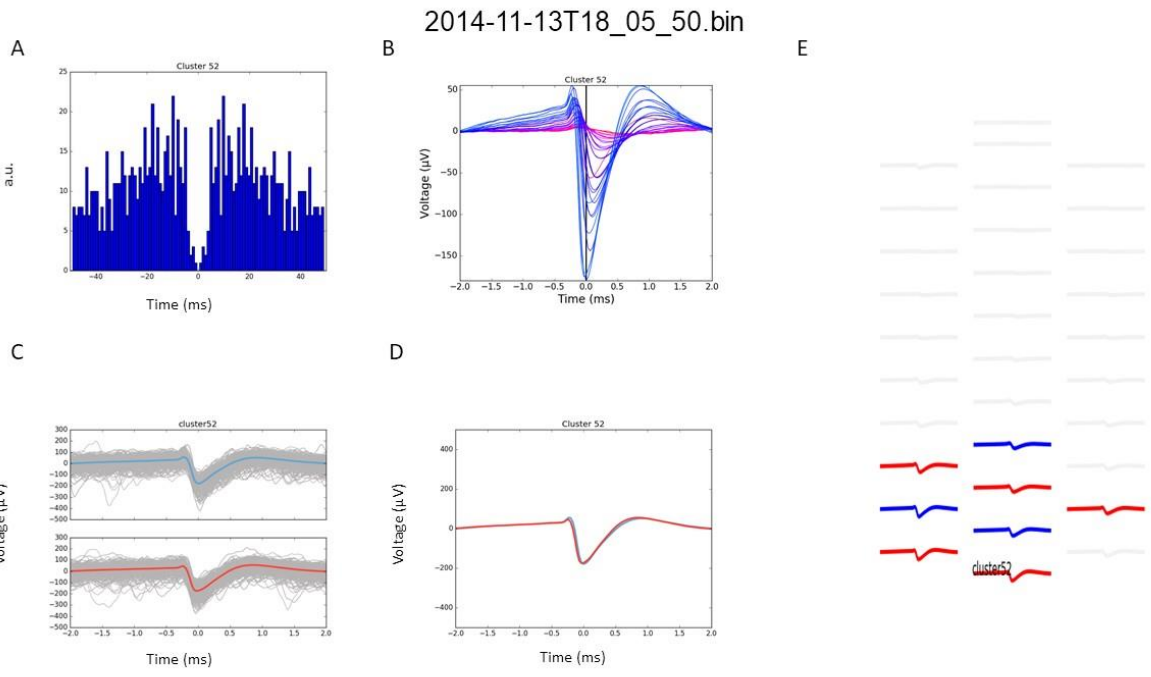

2014-11-13T18\_05\_50.bin

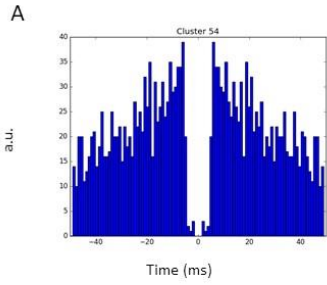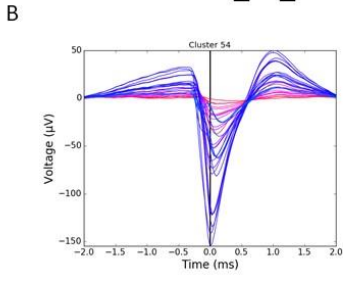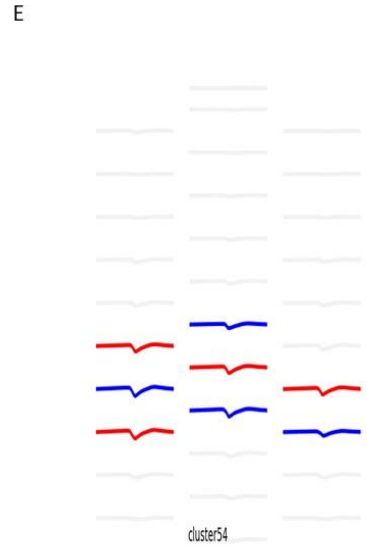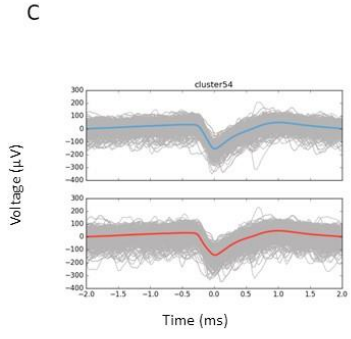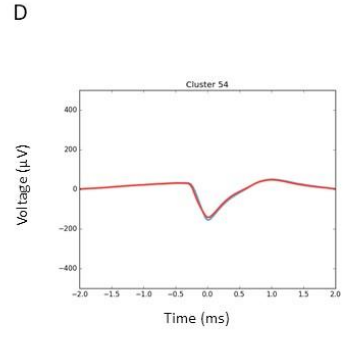

2014-11-13T18\_05\_50.bin

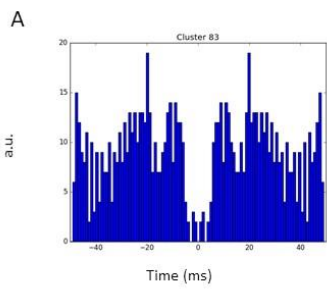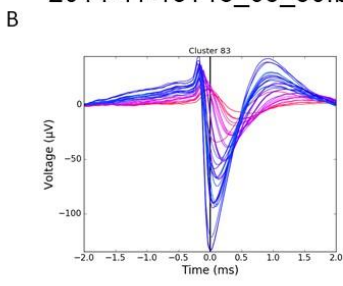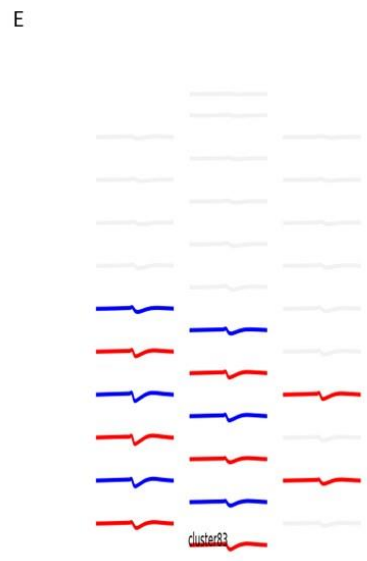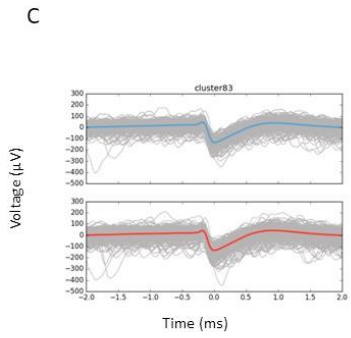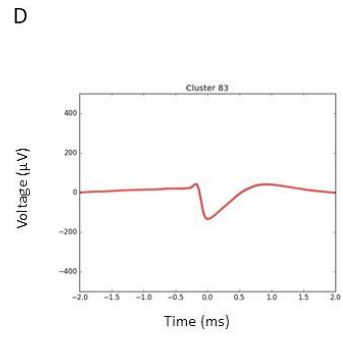

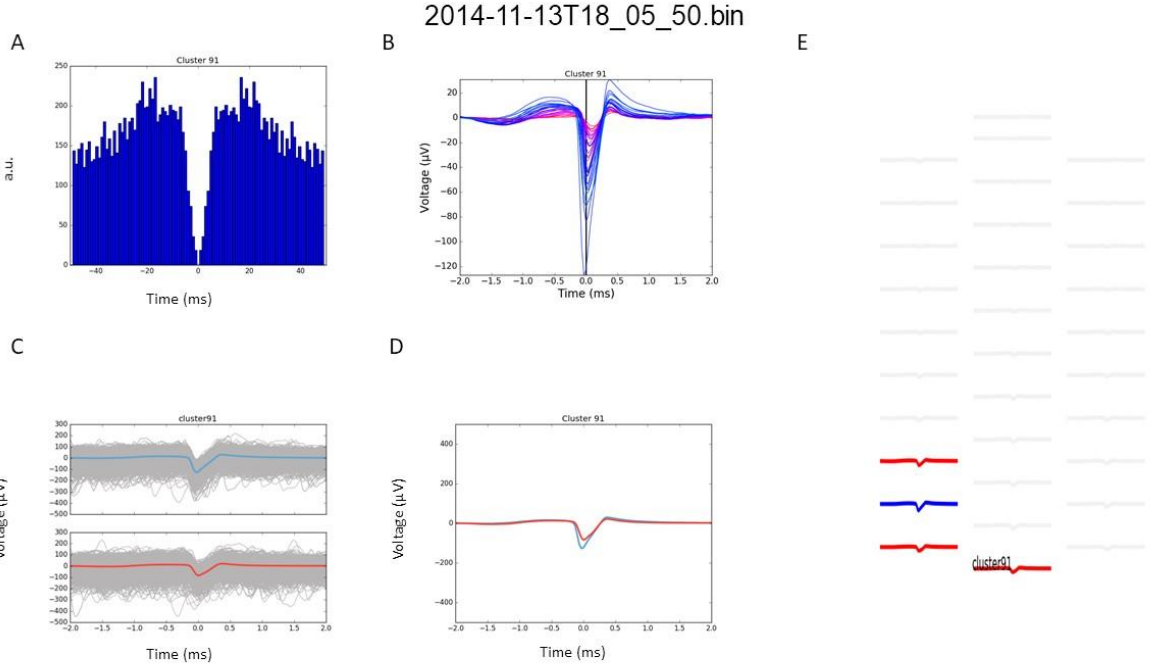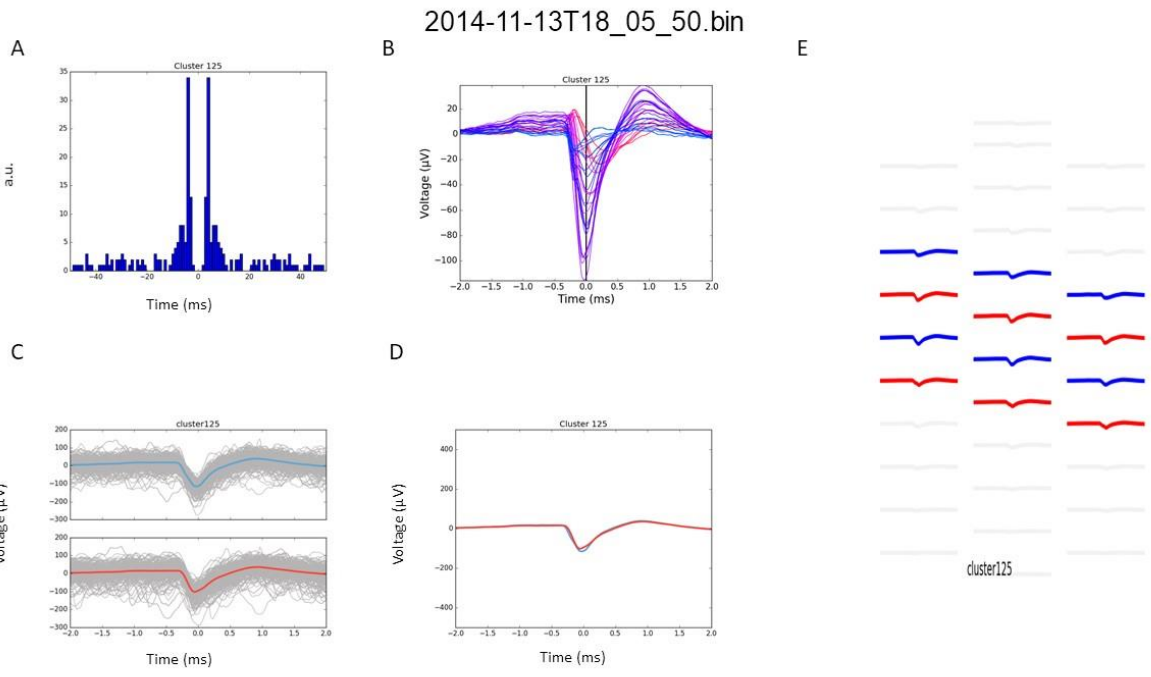



2014-11-13T18\_05\_50.bin

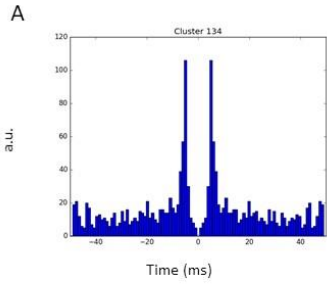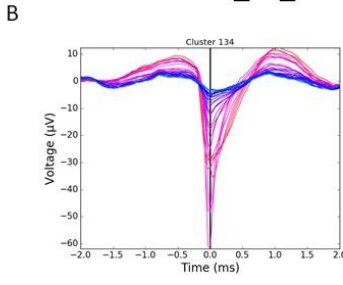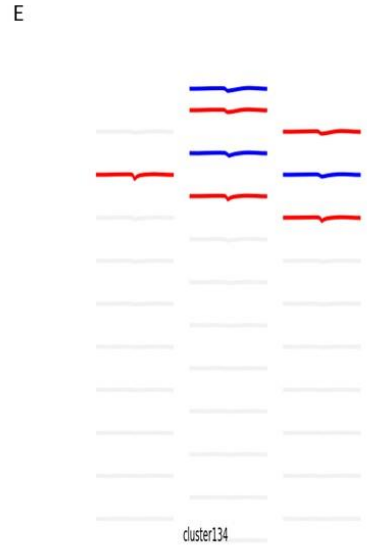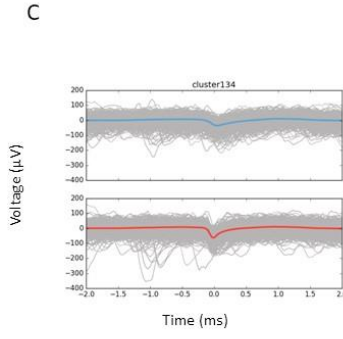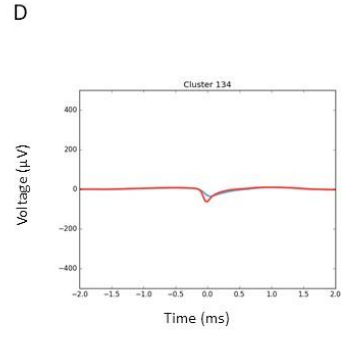

2014-11-13T18\_05\_50.bin

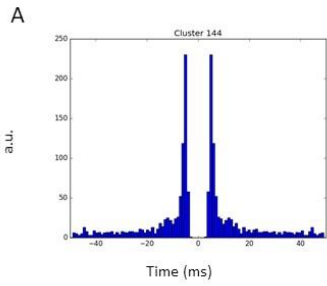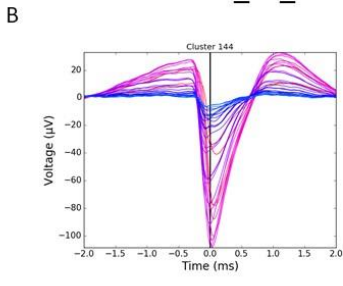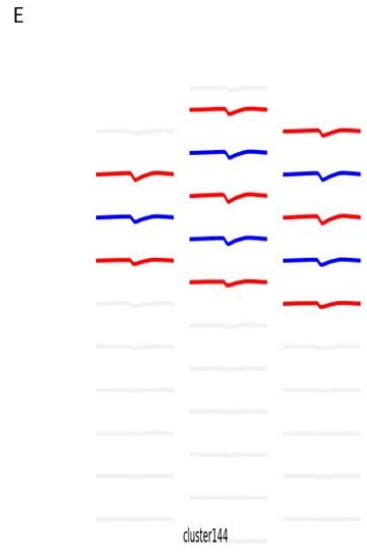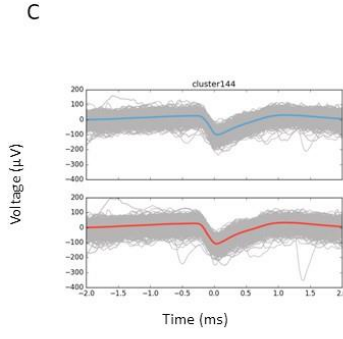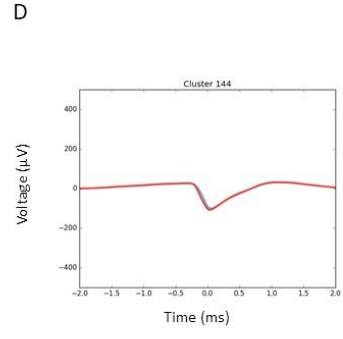

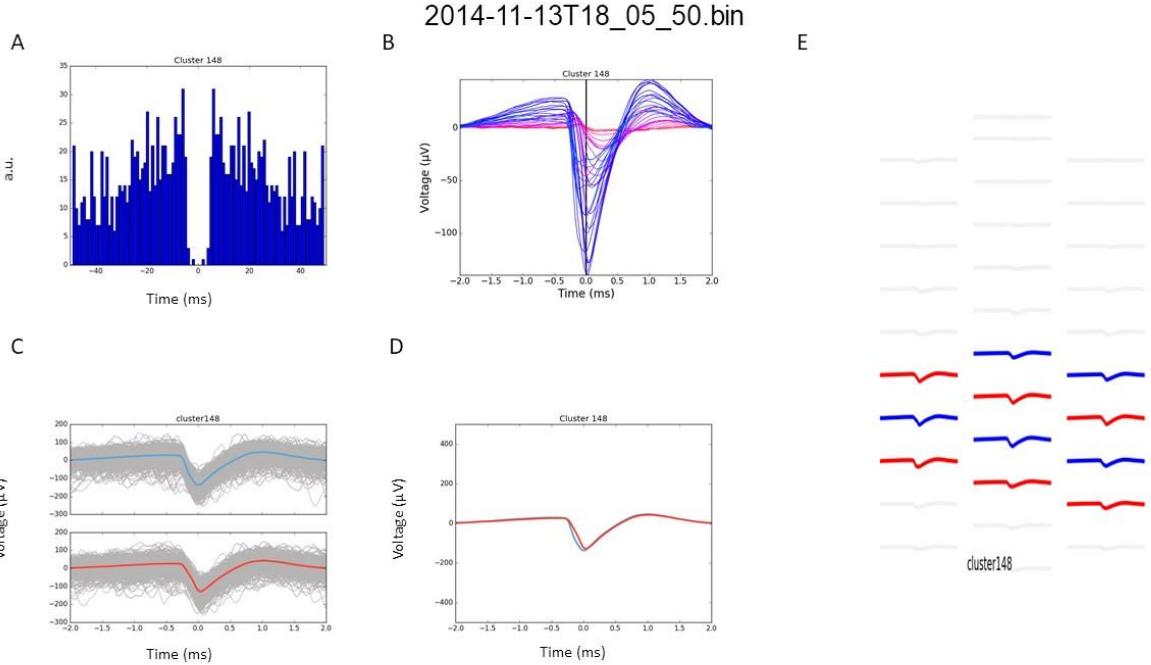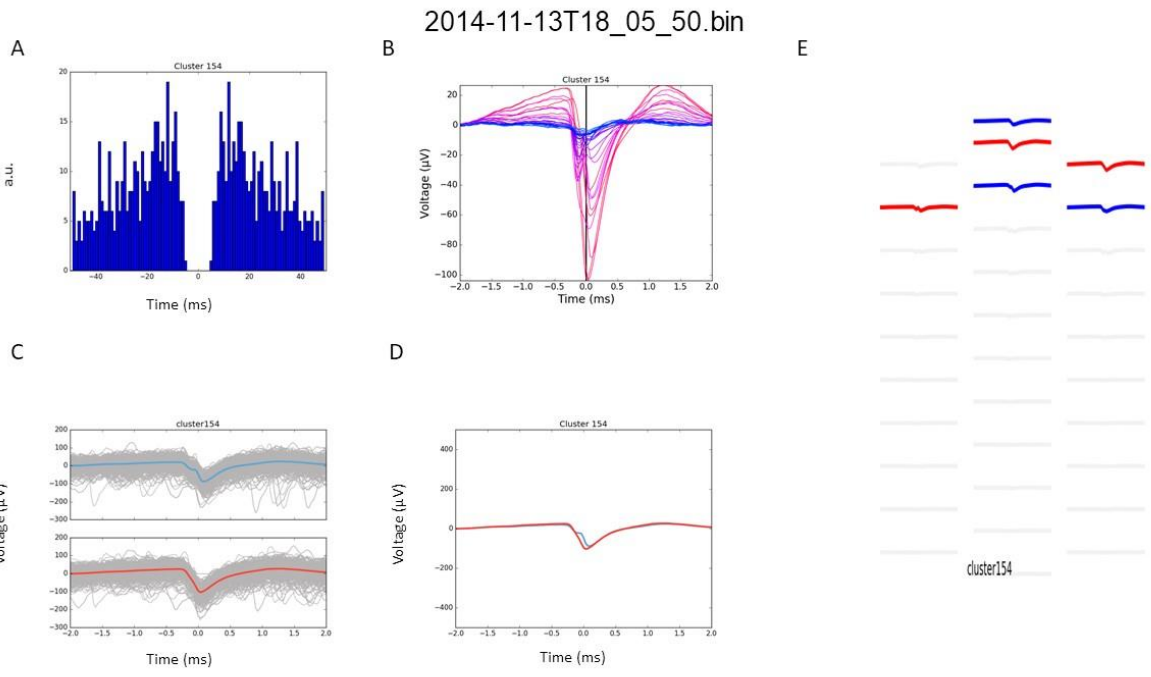

2014-11-13T18\_05\_50.bin

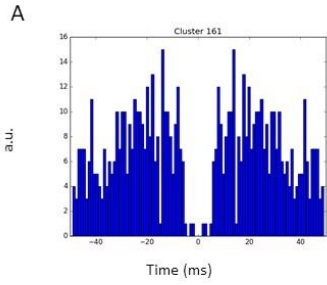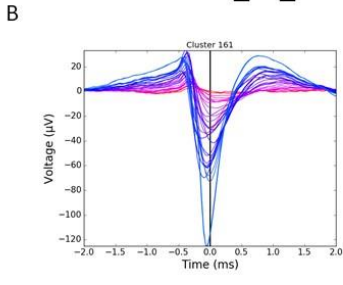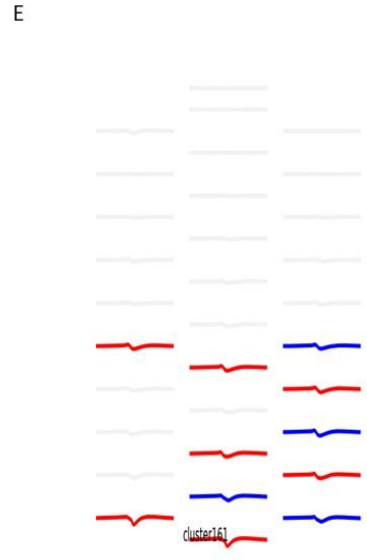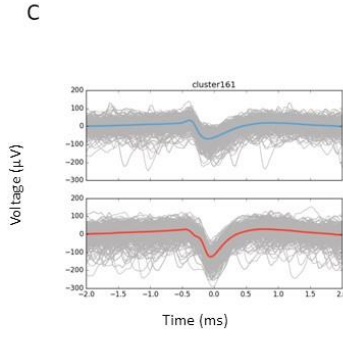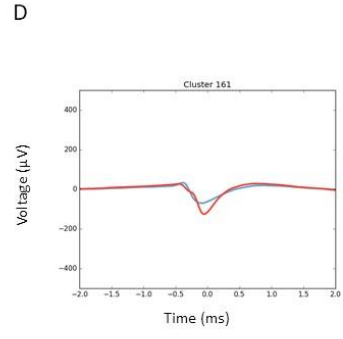

2014-11-13T18\_05\_50.bin

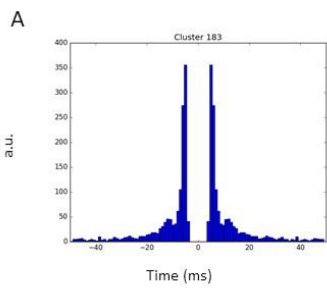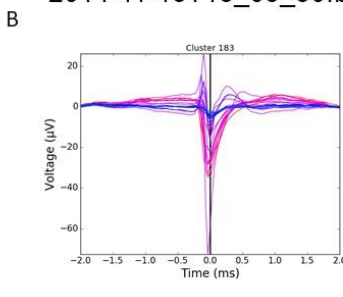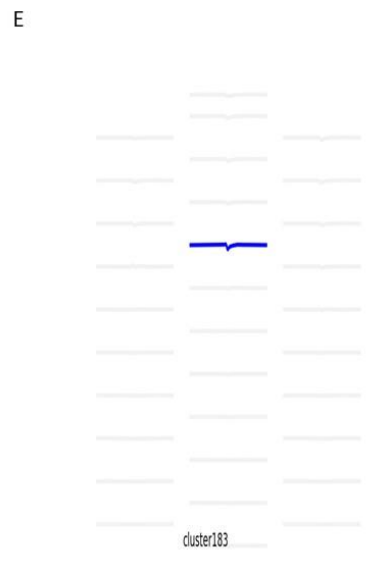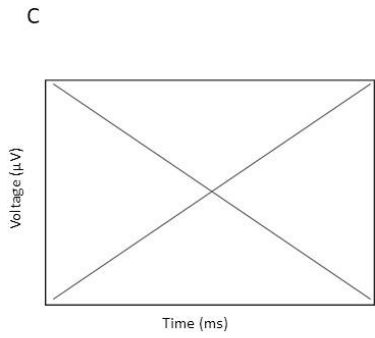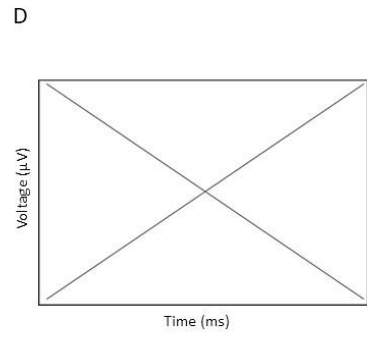

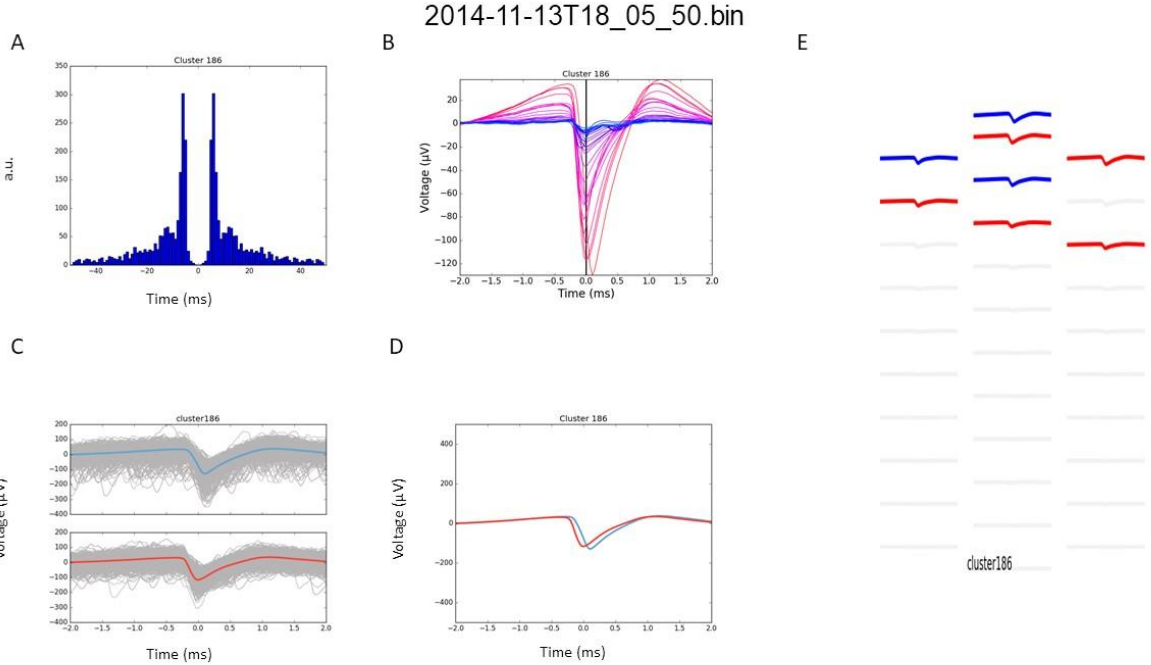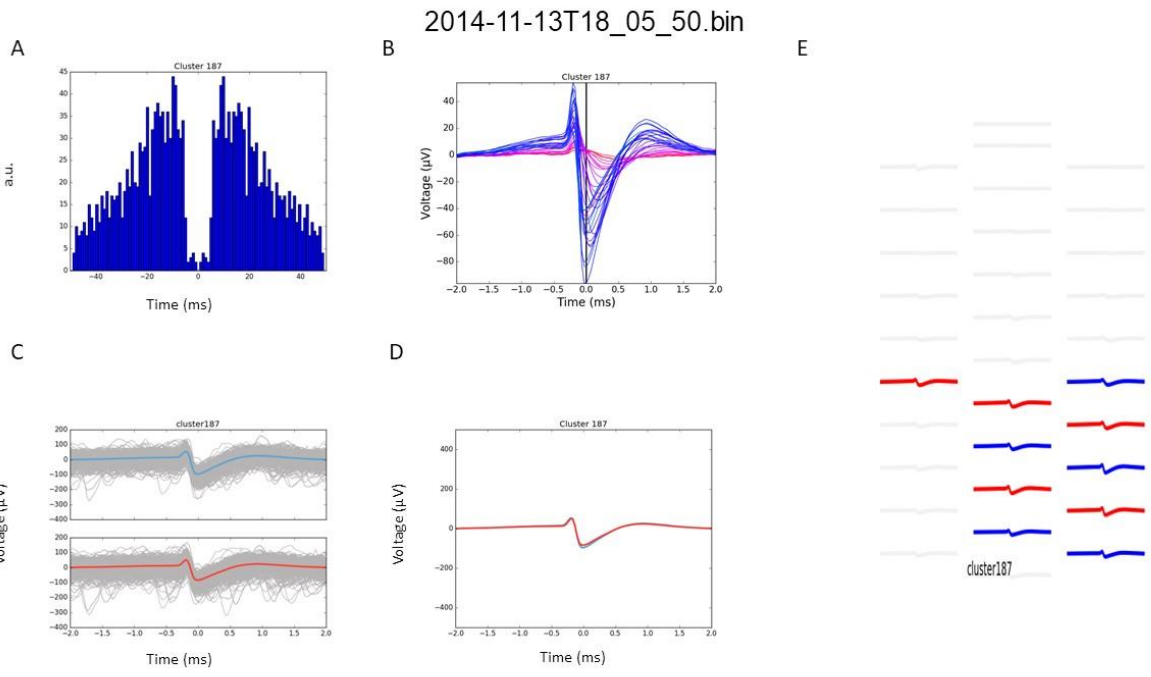

2014-11-13T18\_05\_50.bin

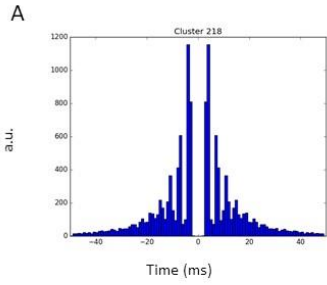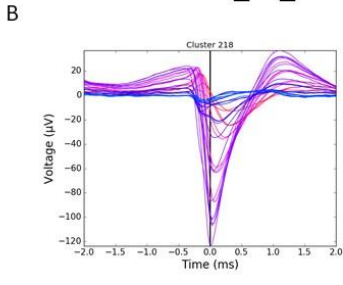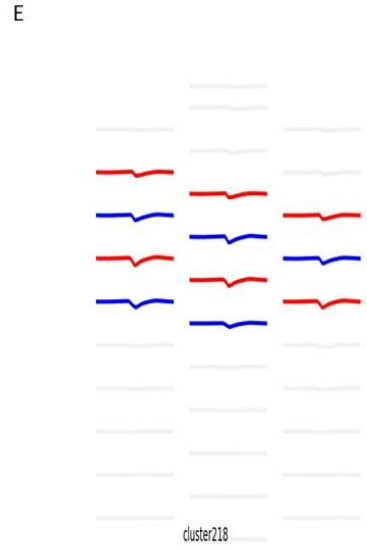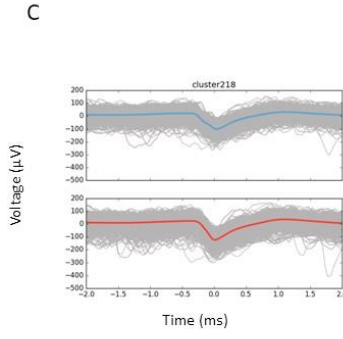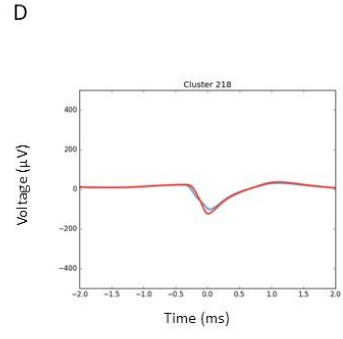

2014-11-13T18\_05\_50.bin

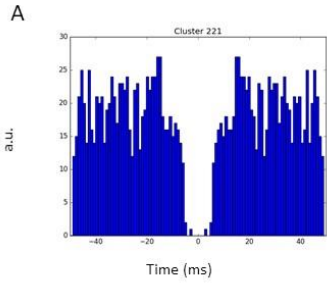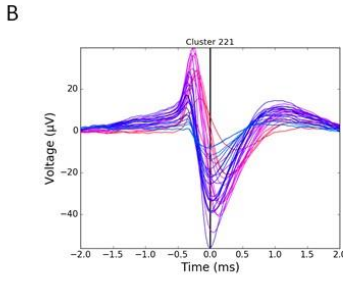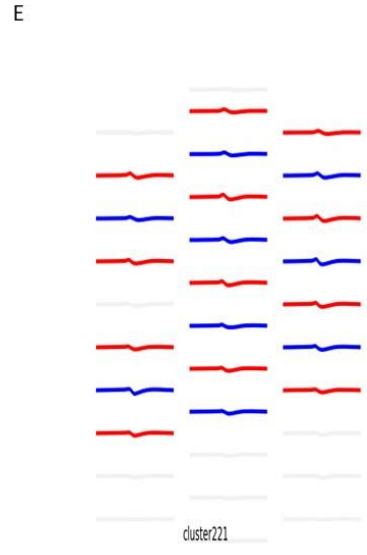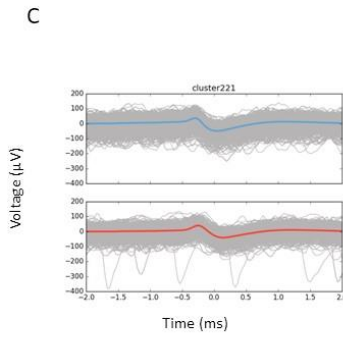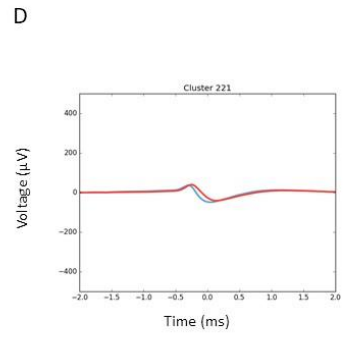

2014-11-25T20\_32\_48.bin

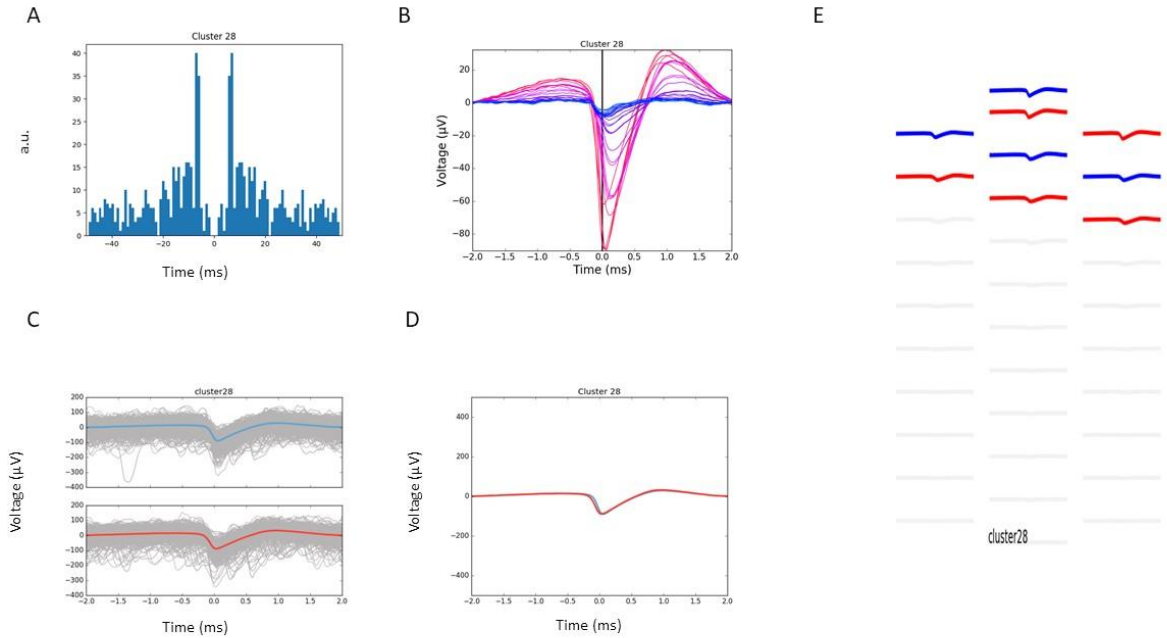

2014-11-13T18\_05\_50.bin

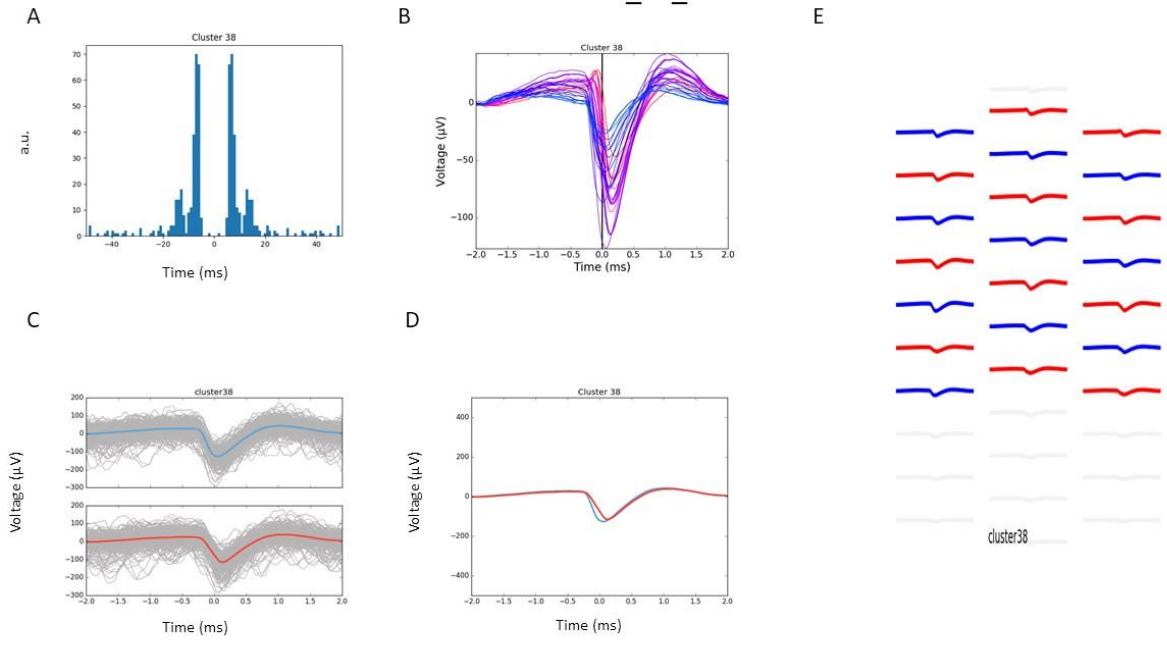

2014-11-13T18\_05\_50.bin

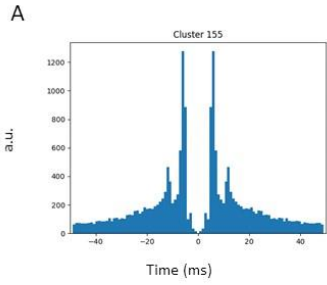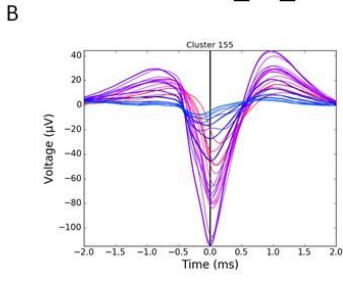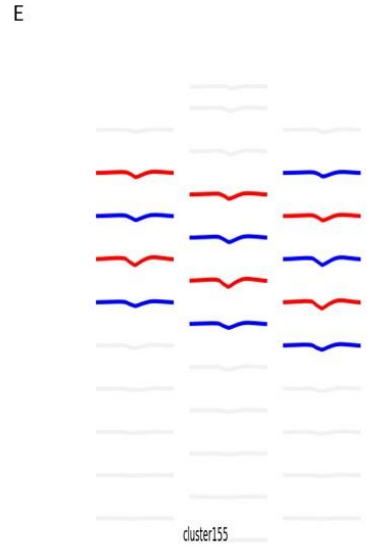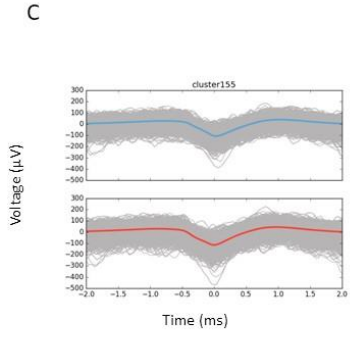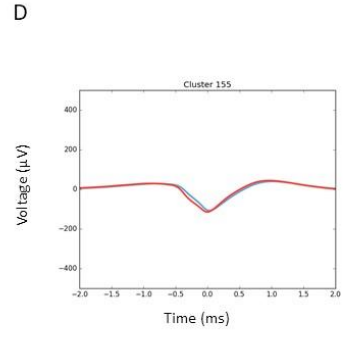

2014-11-13T18\_05\_50.bin

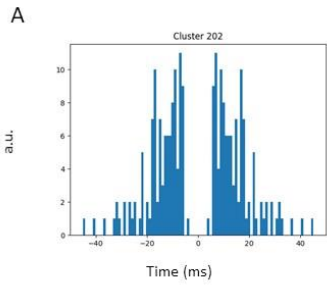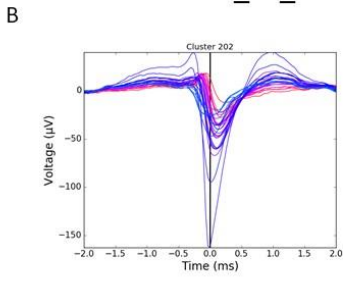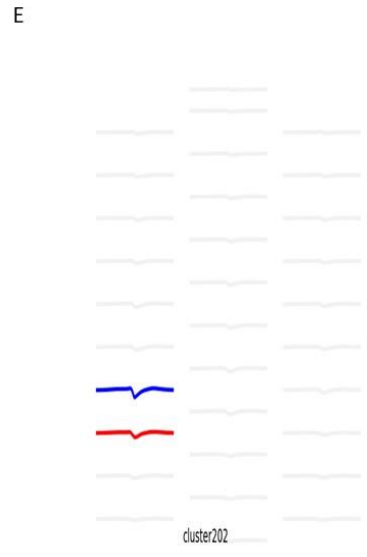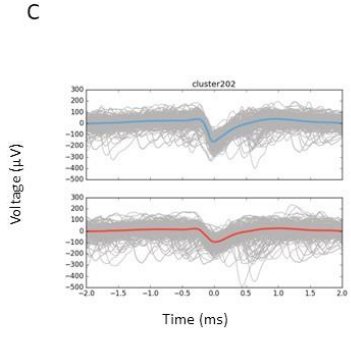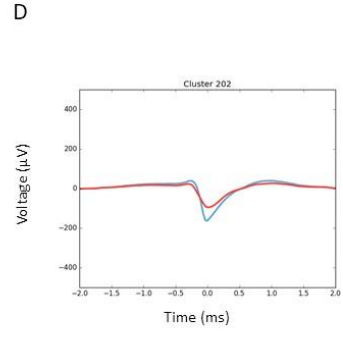

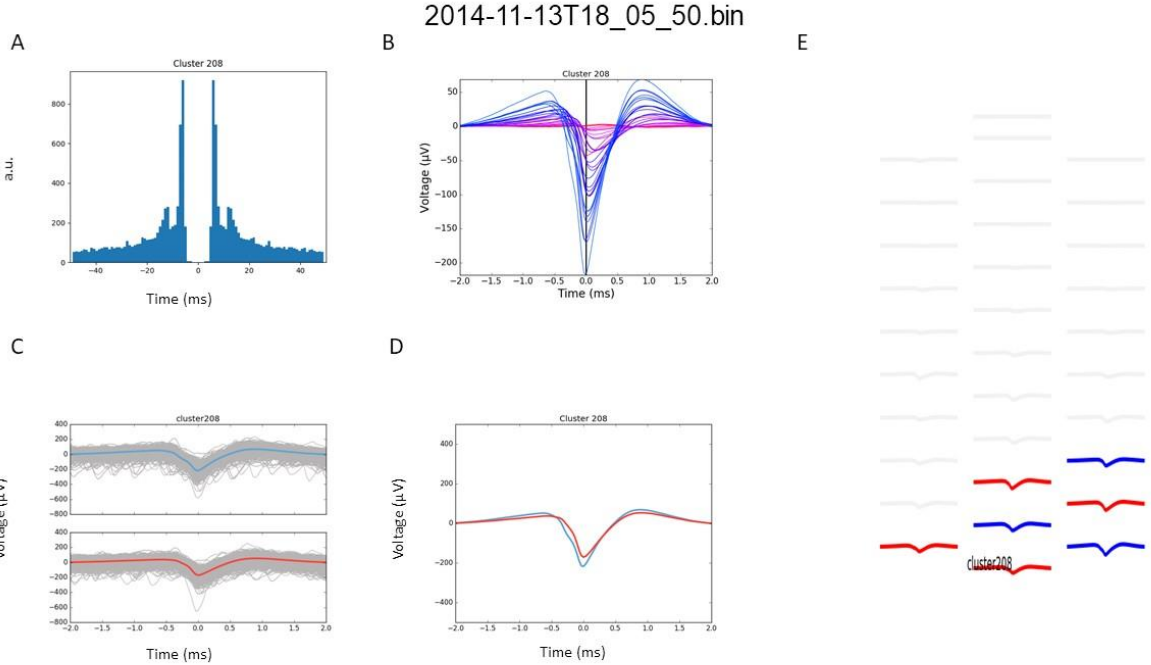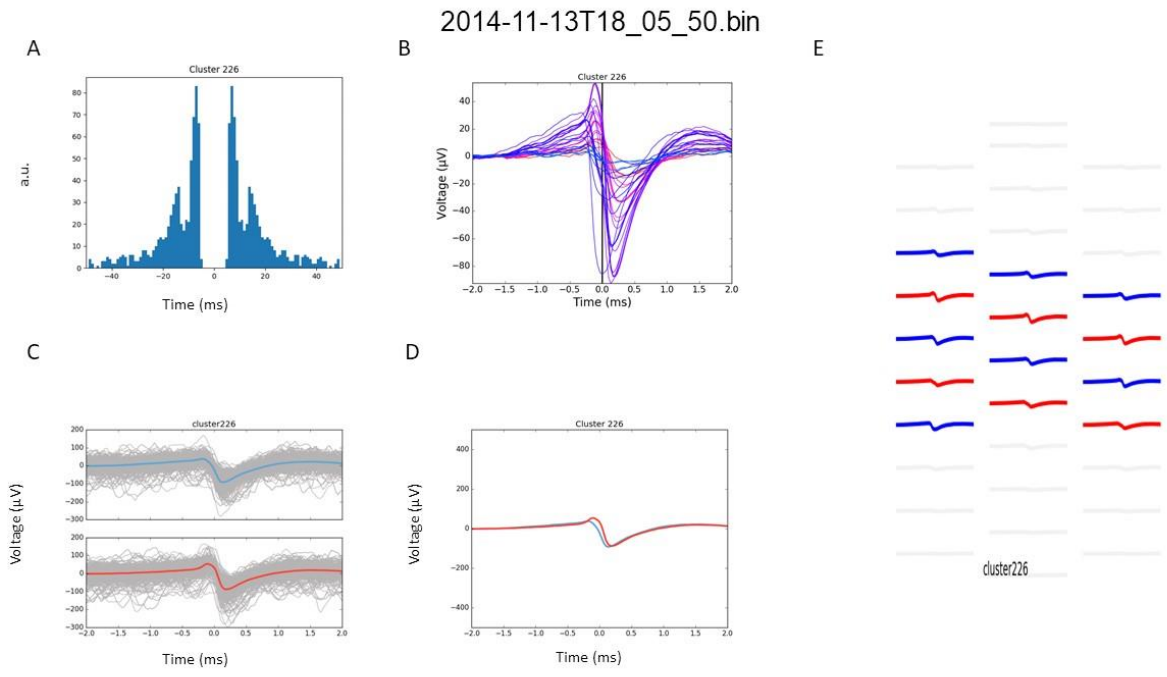



2014-11-13T18\_05\_50.bin

A

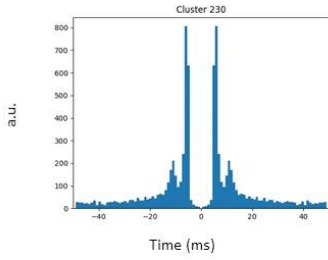

B

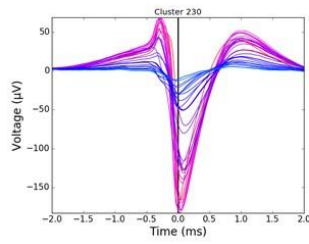

E

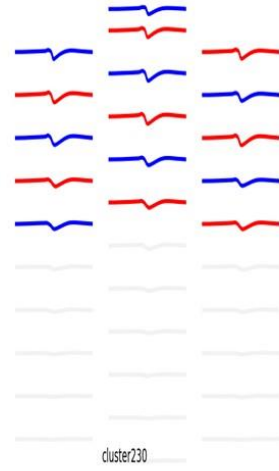

C

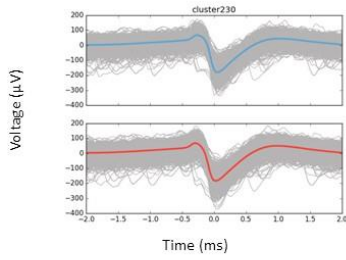

D

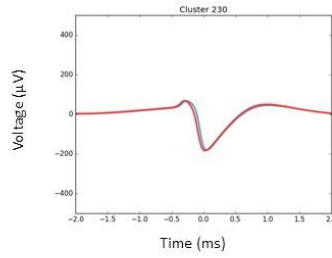

2014-11-13T18\_05\_50.bin

A

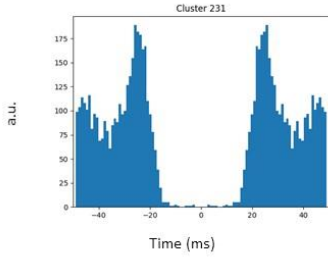

B

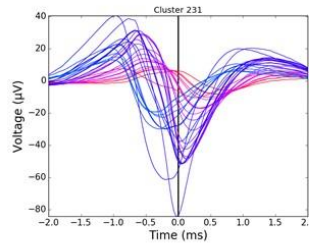

E

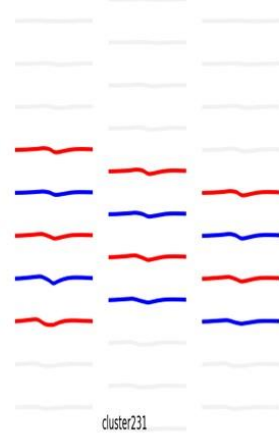

C

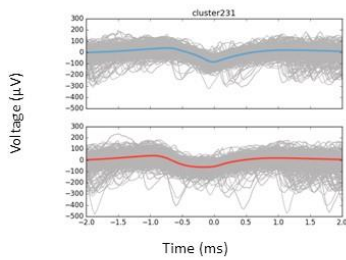

D

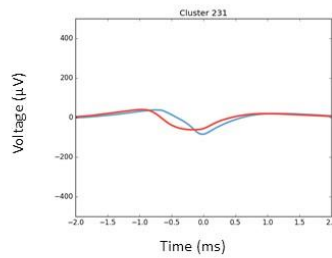

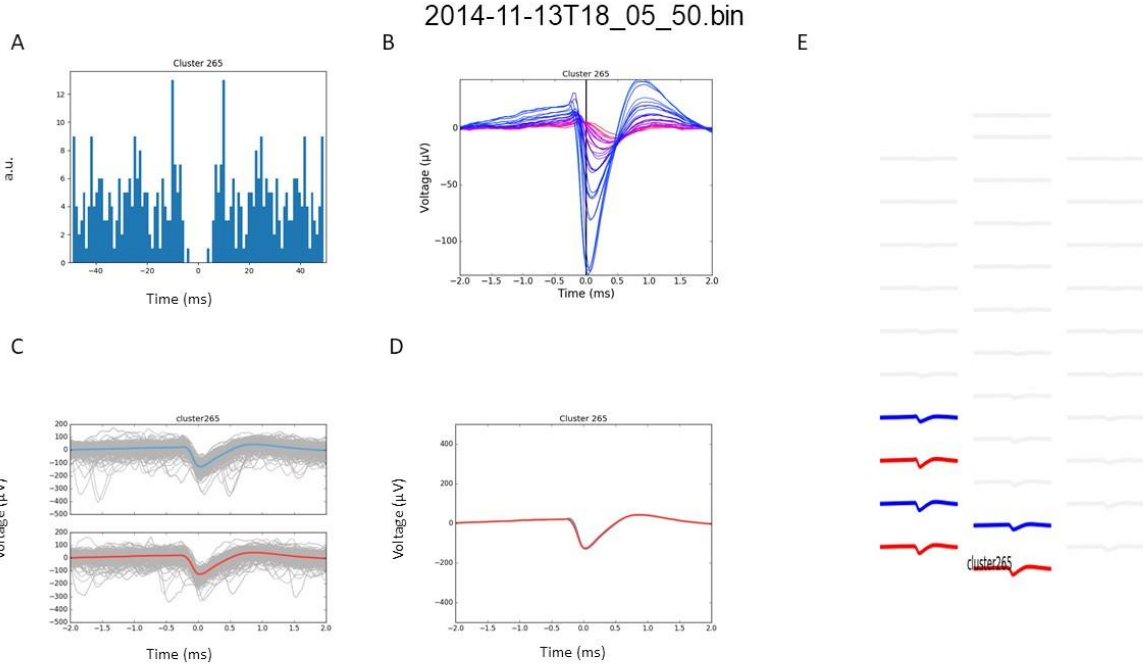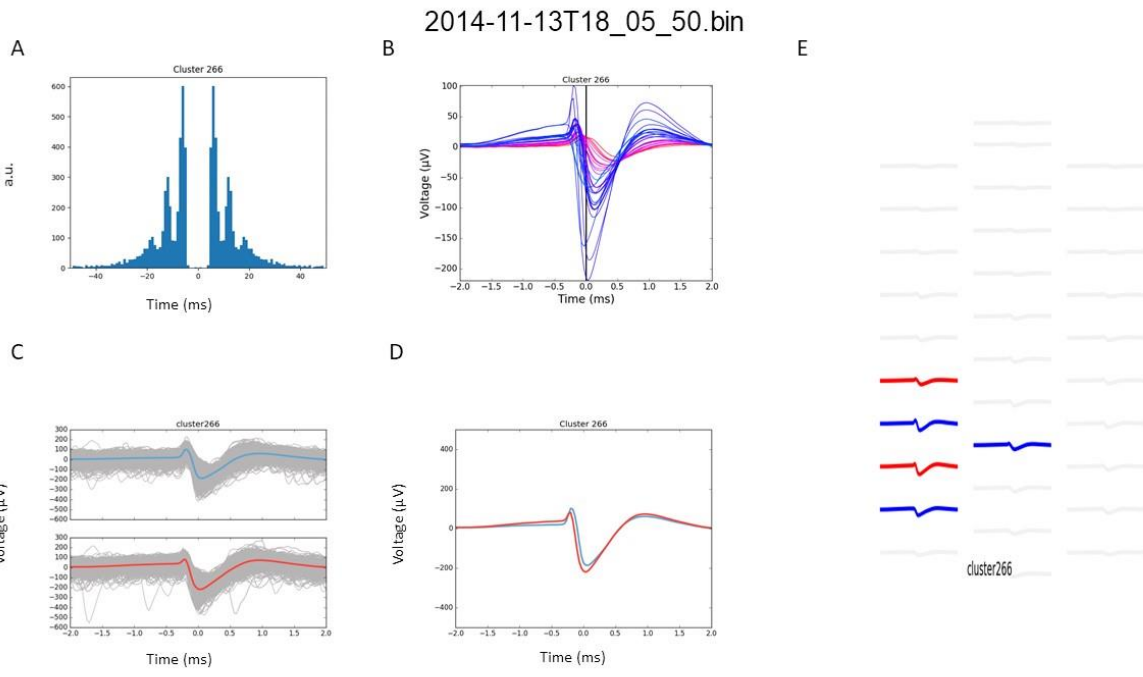

2014-11-13T18\_05\_50.bin

A

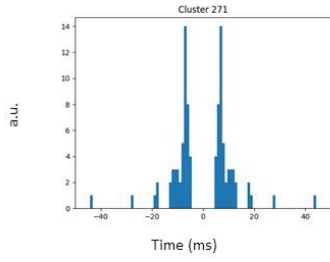

B

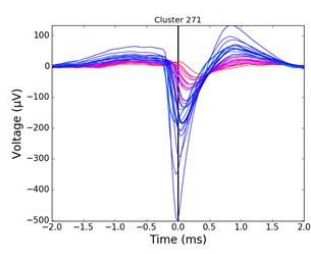

E

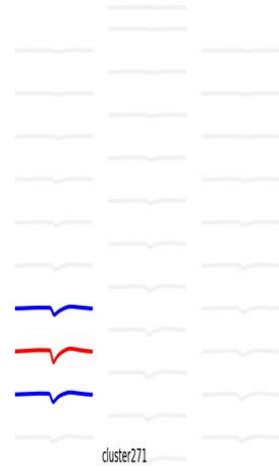

C

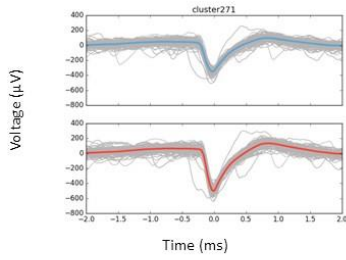

D

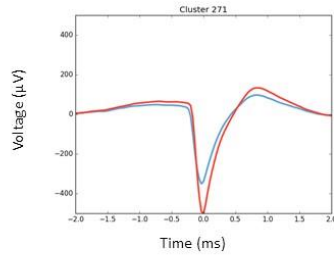

2014-11-25T21\_27\_13.bin

A

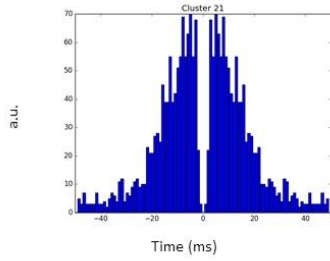

B

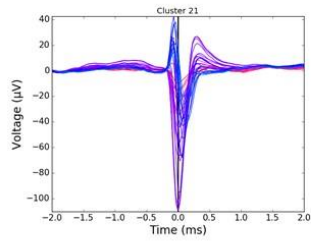

E

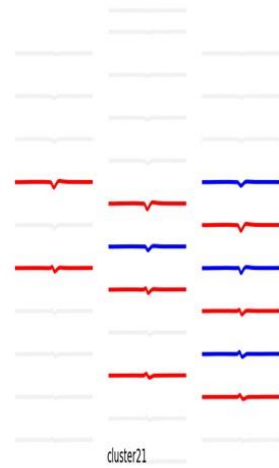

C

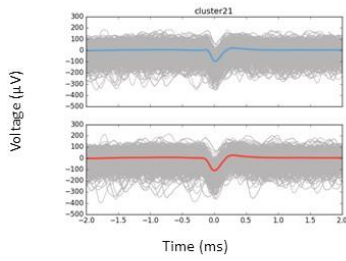

D

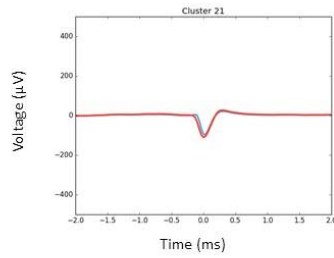

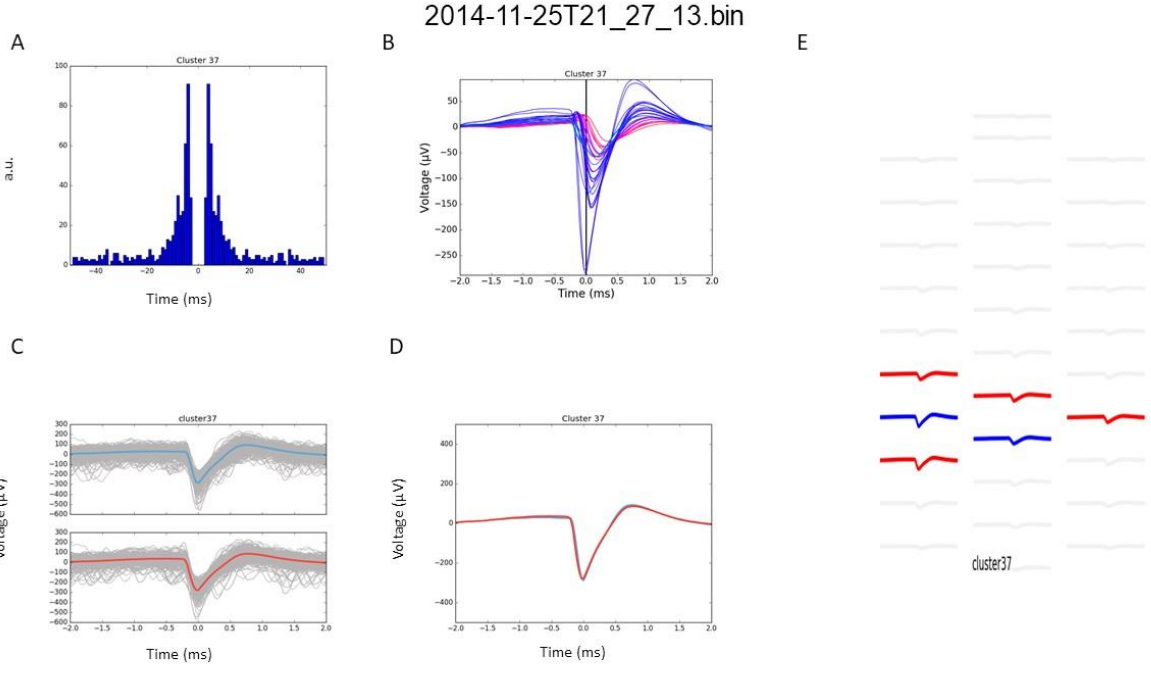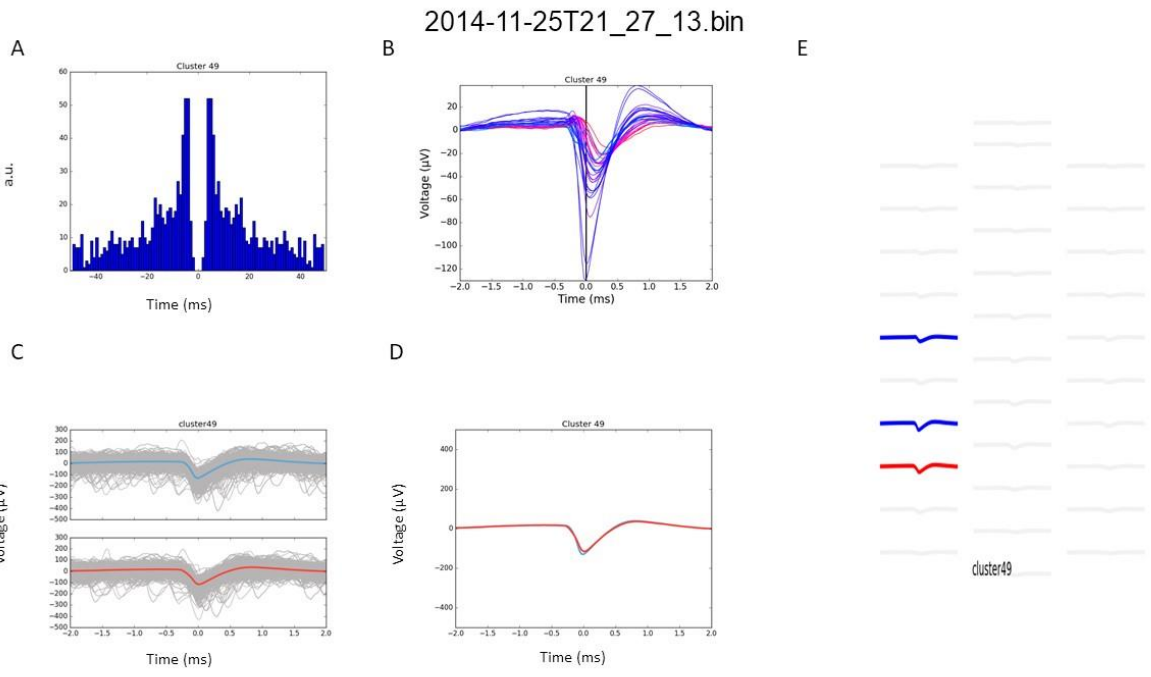

2014-11-25T21\_27\_13.bin

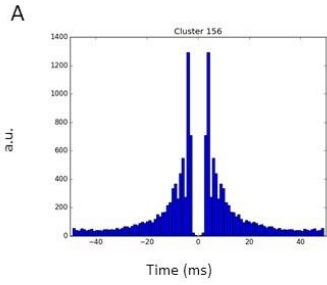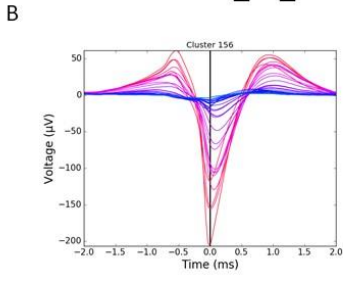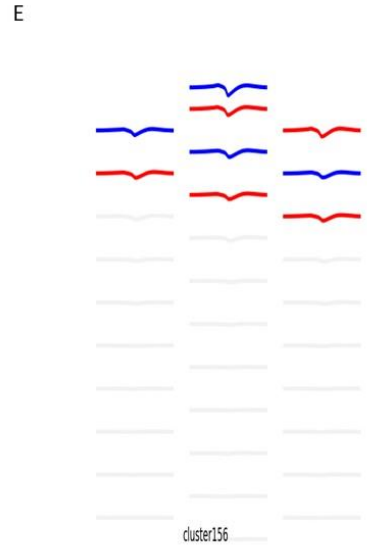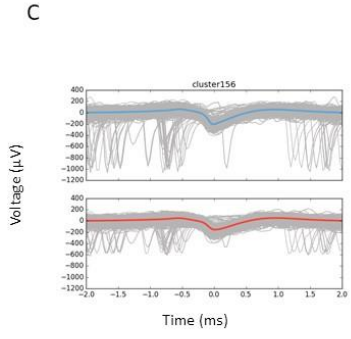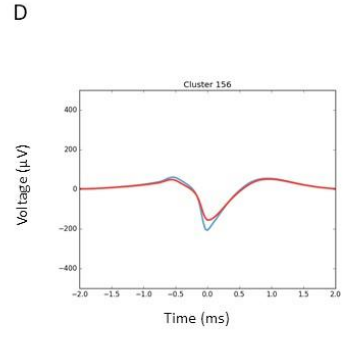

2014-11-25T21\_27\_13.bin

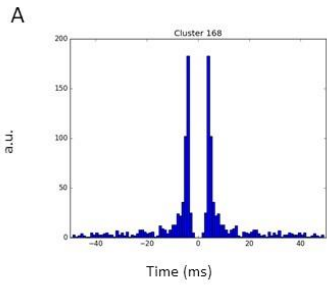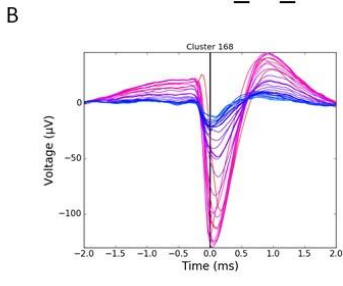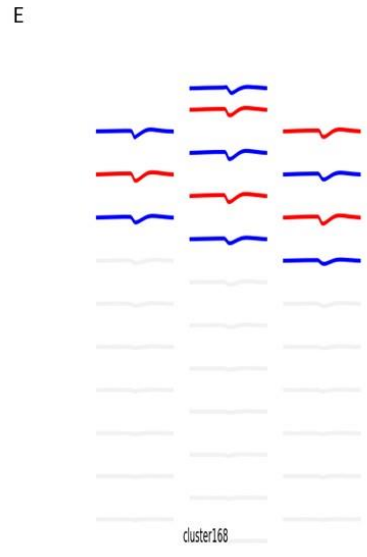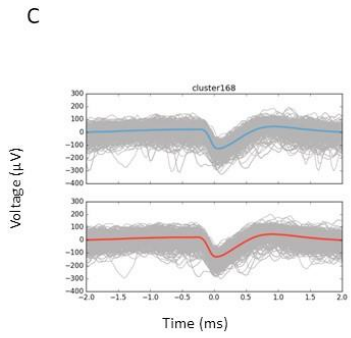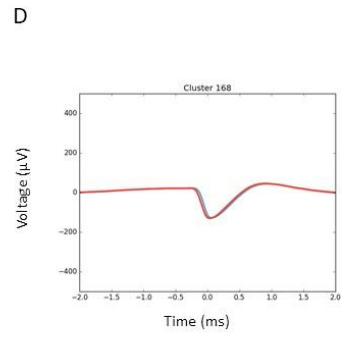

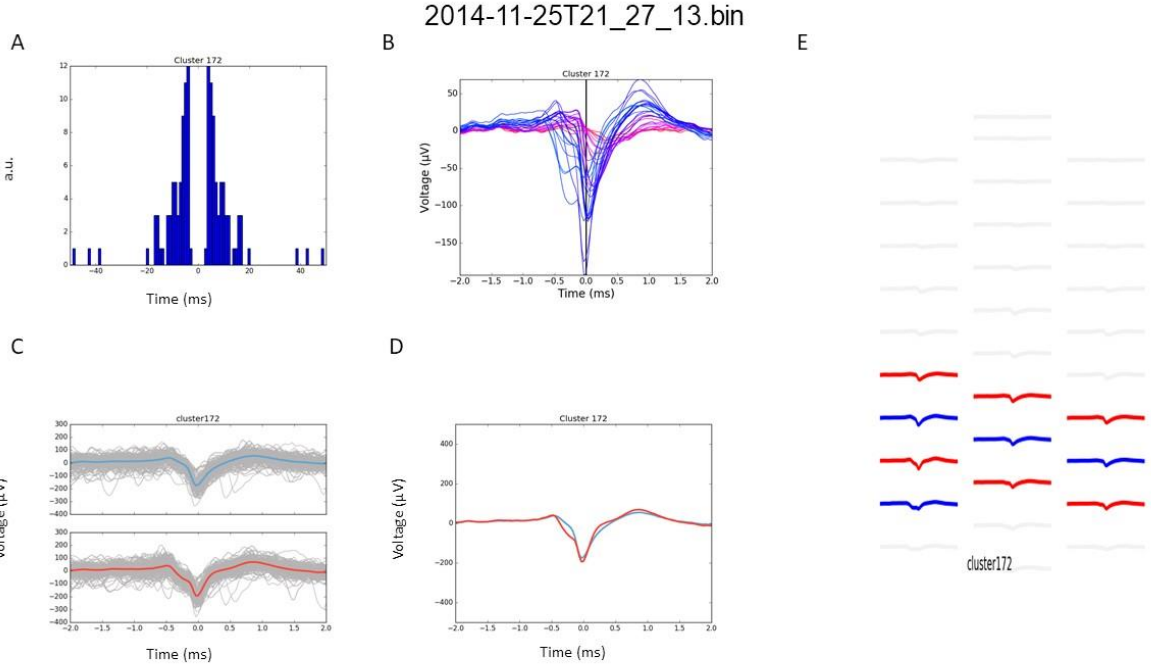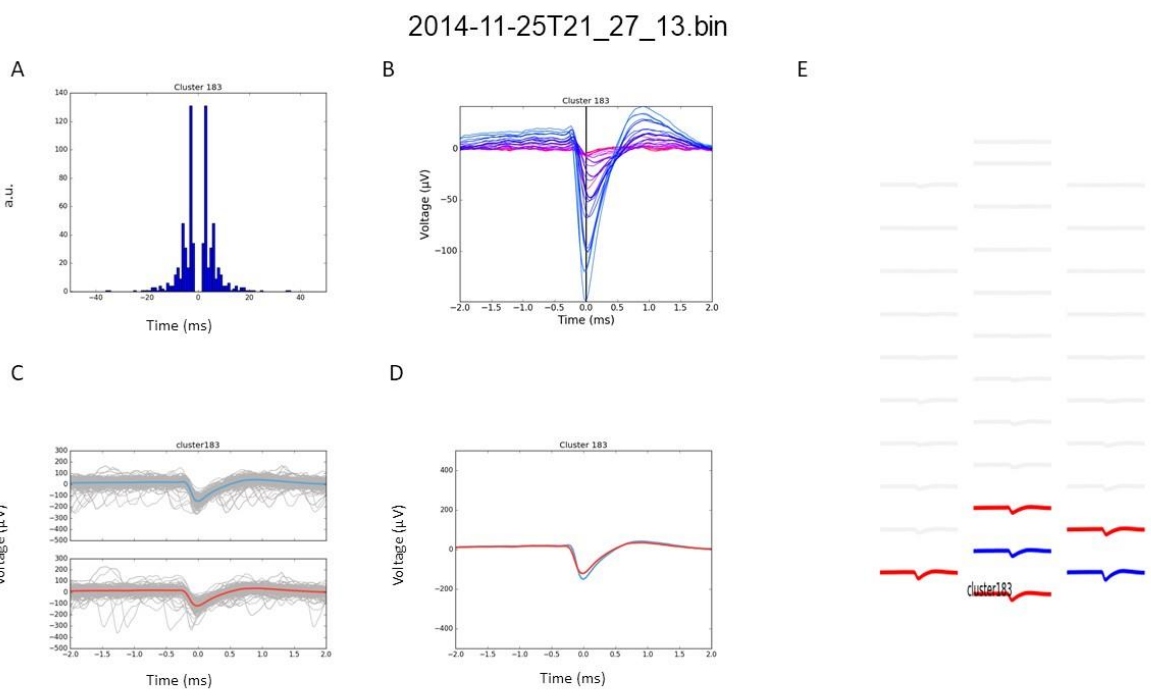

2014-11-25T23\_00\_08.bin

A

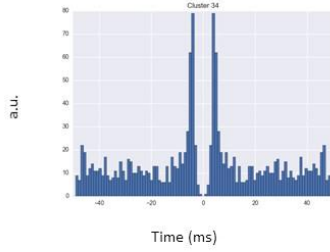

B

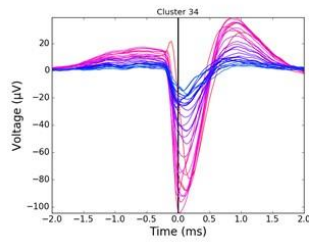

E

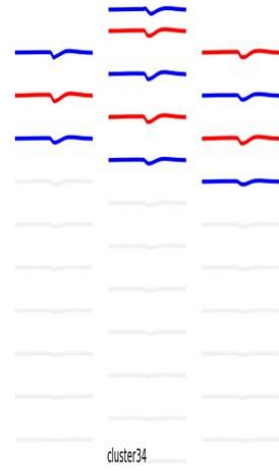

C

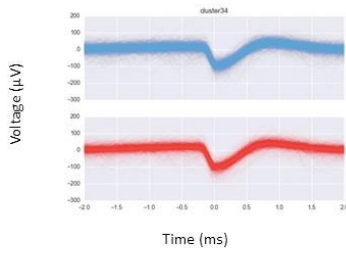

D

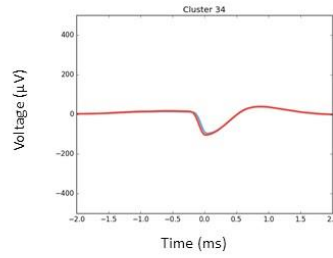

2014-11-25T23\_00\_08.bin

A

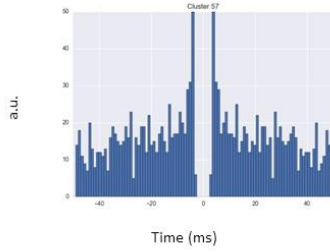

B

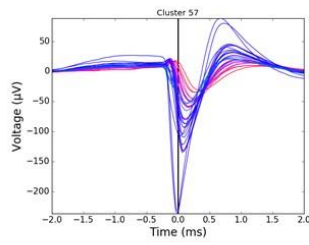

E

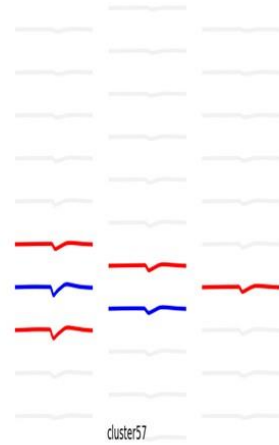

C

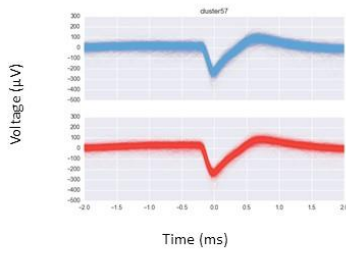

D

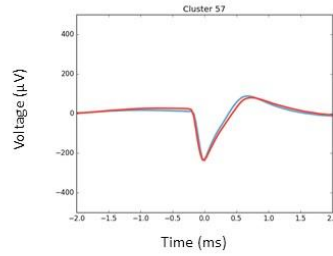

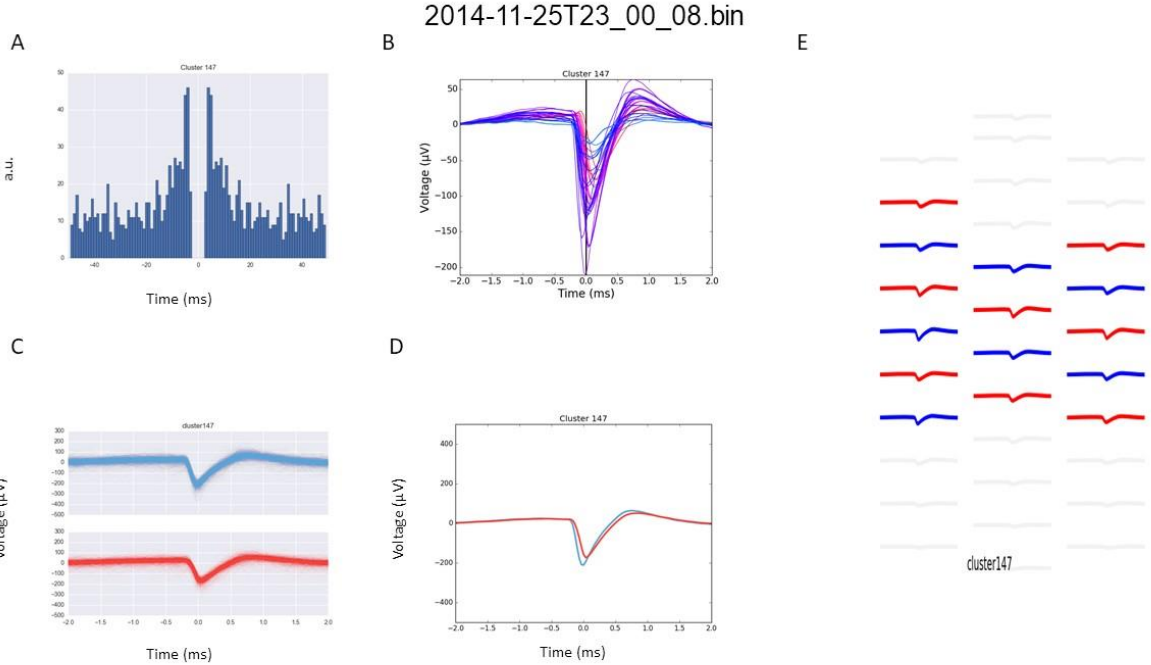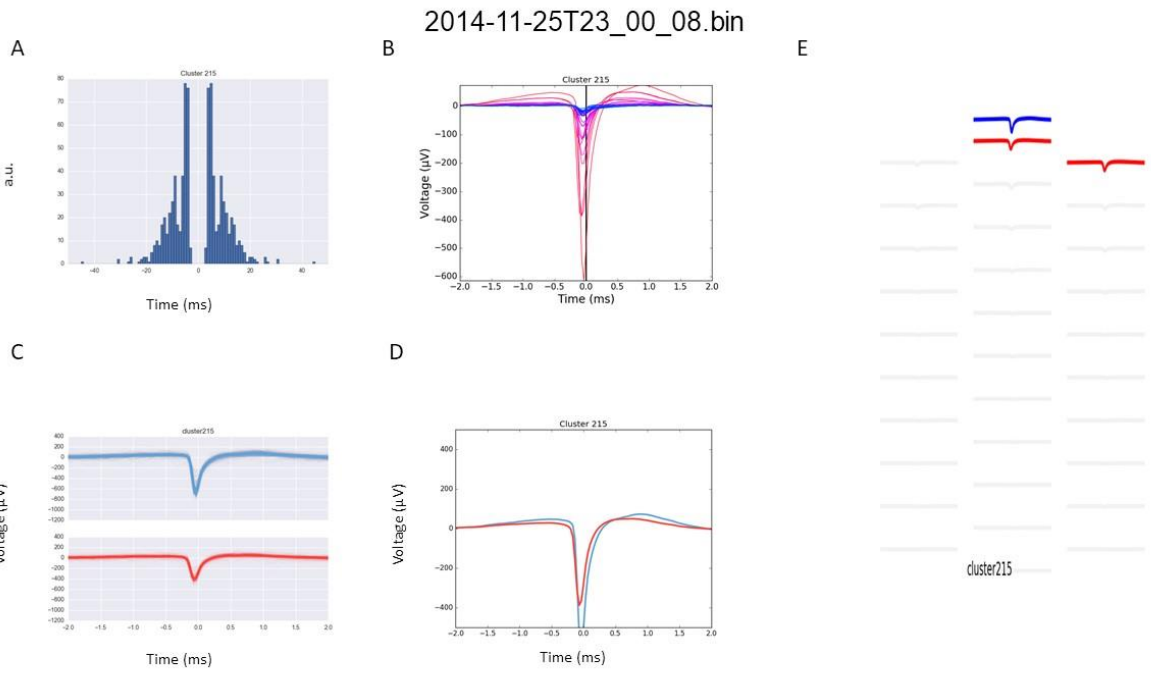



2014-11-25T23\_00\_08.bin

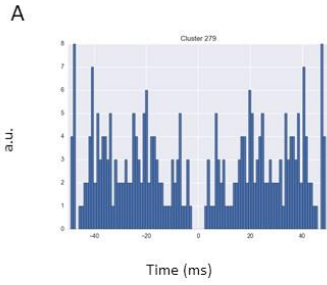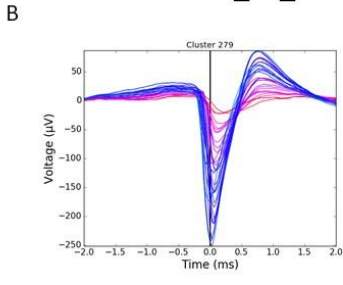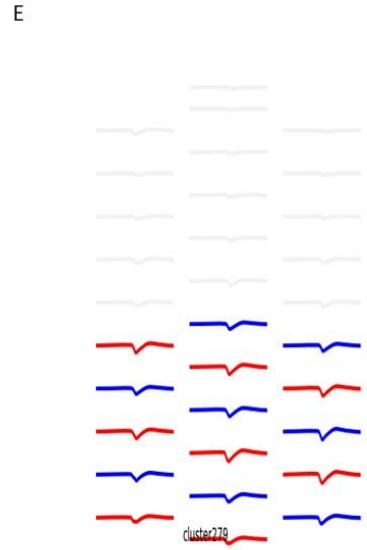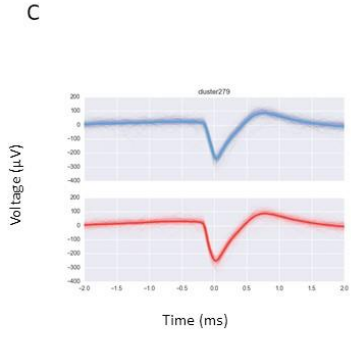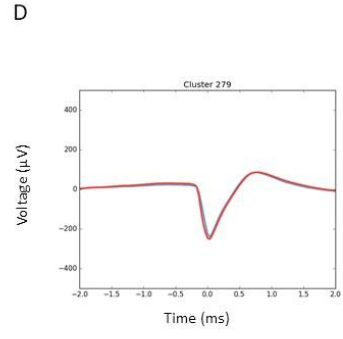

2014-11-25T23\_00\_08.bin

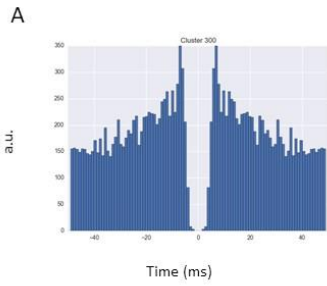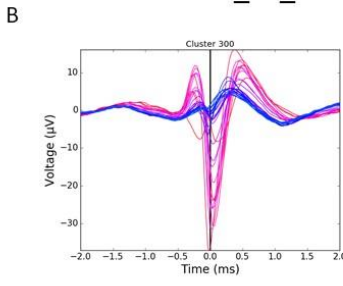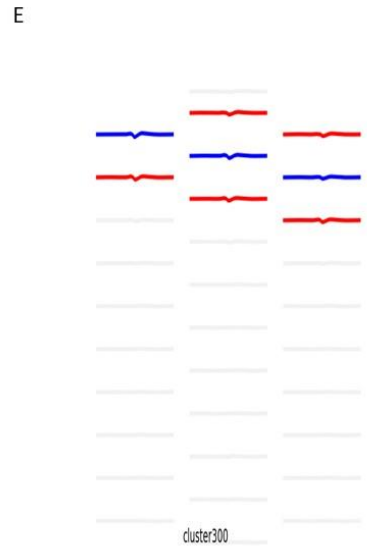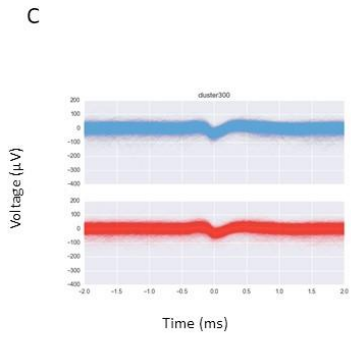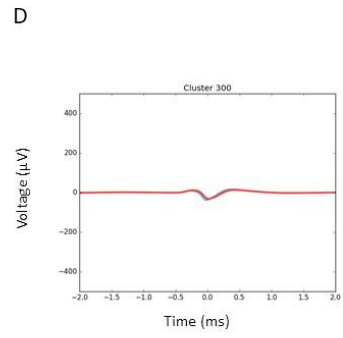

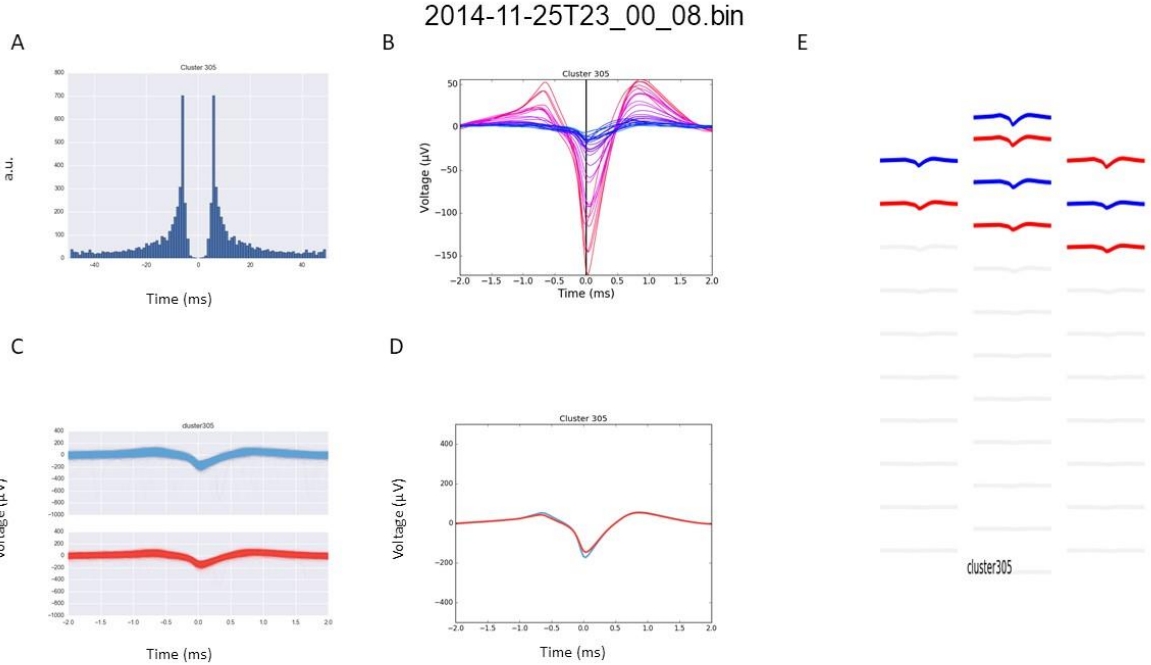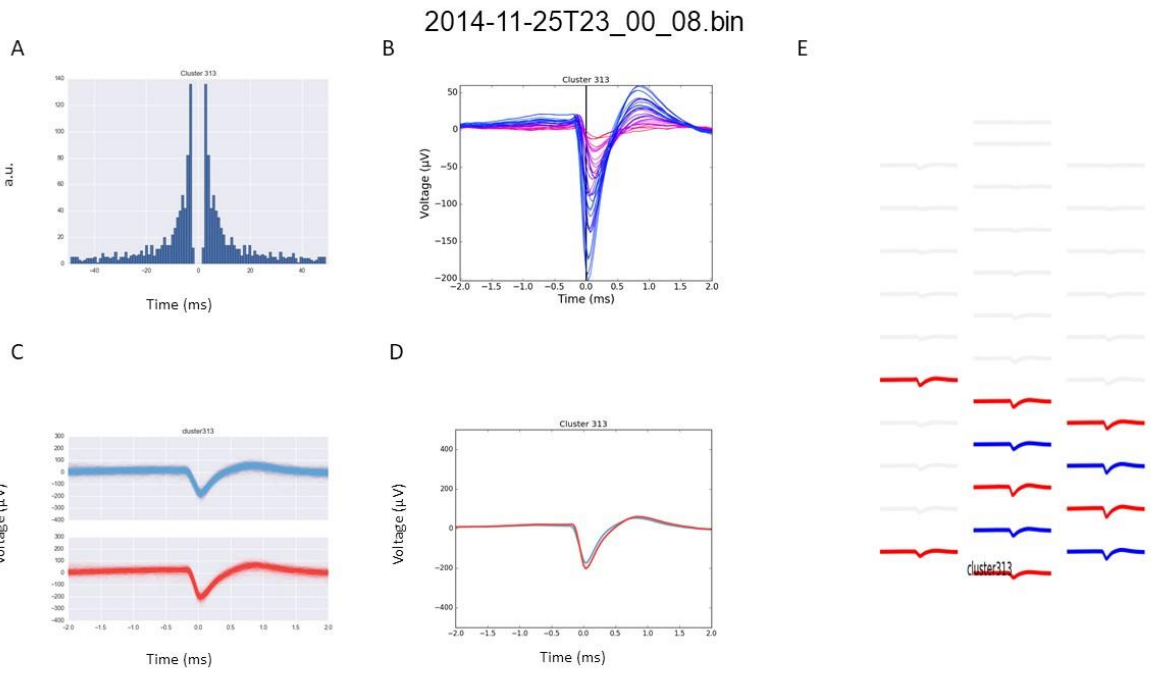

2014-11-25T23\_00\_08.bin

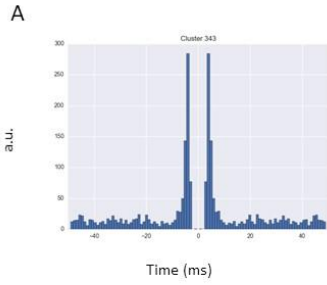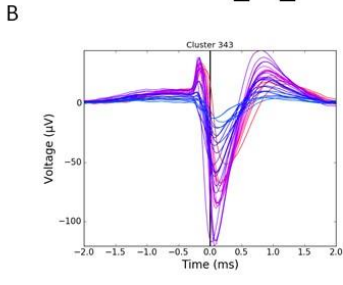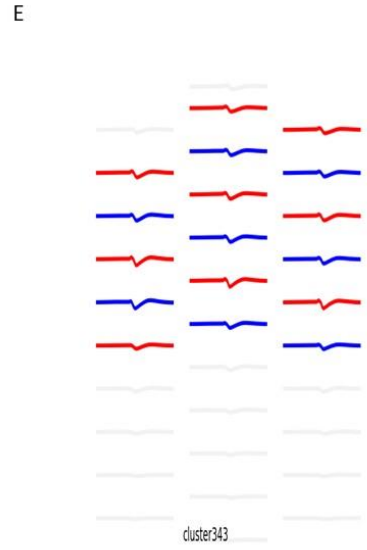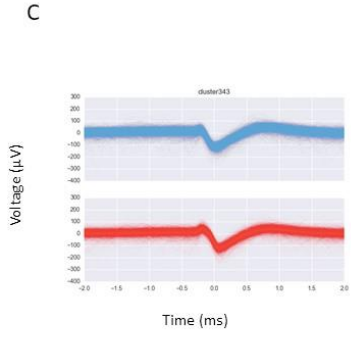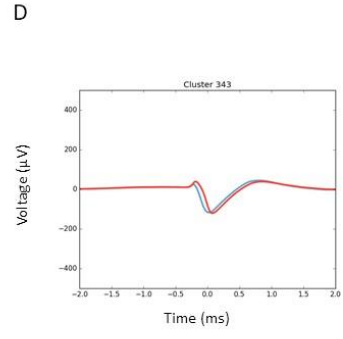

2014-11-25T23\_00\_08.bin

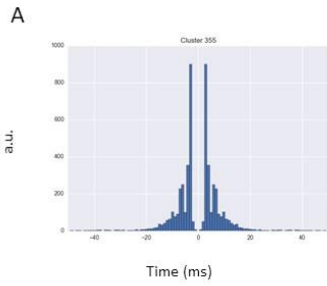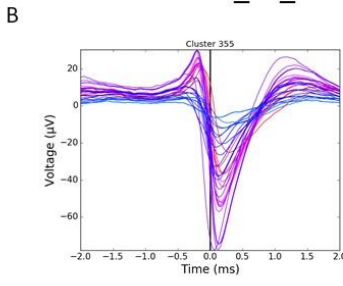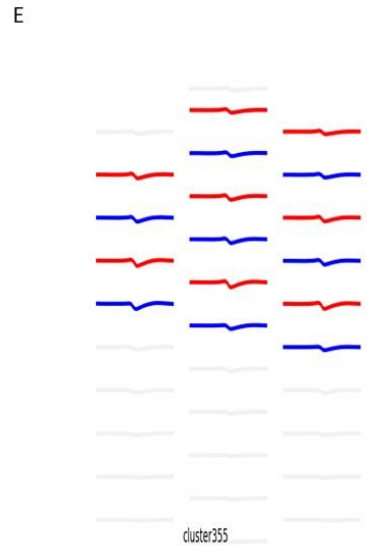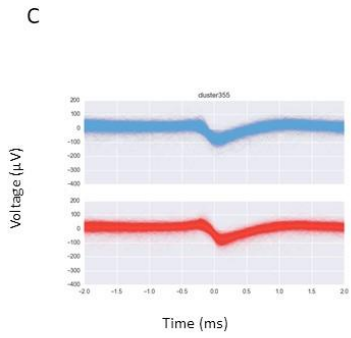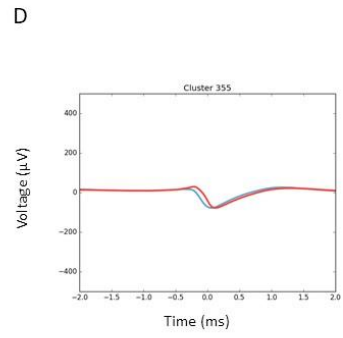

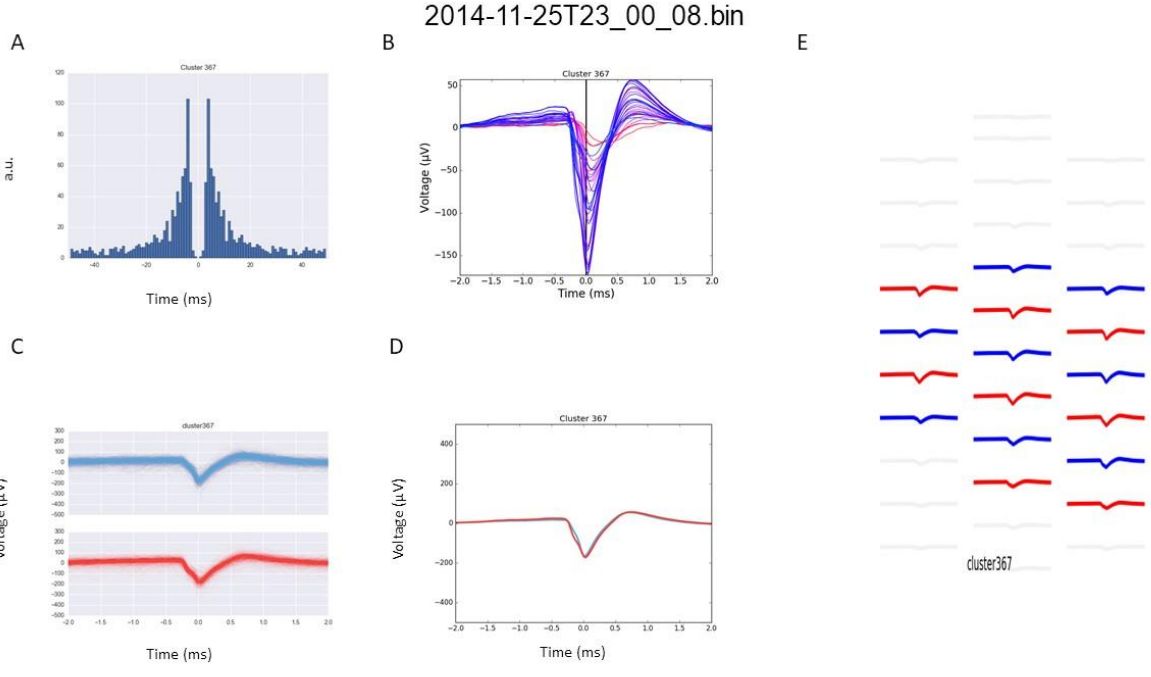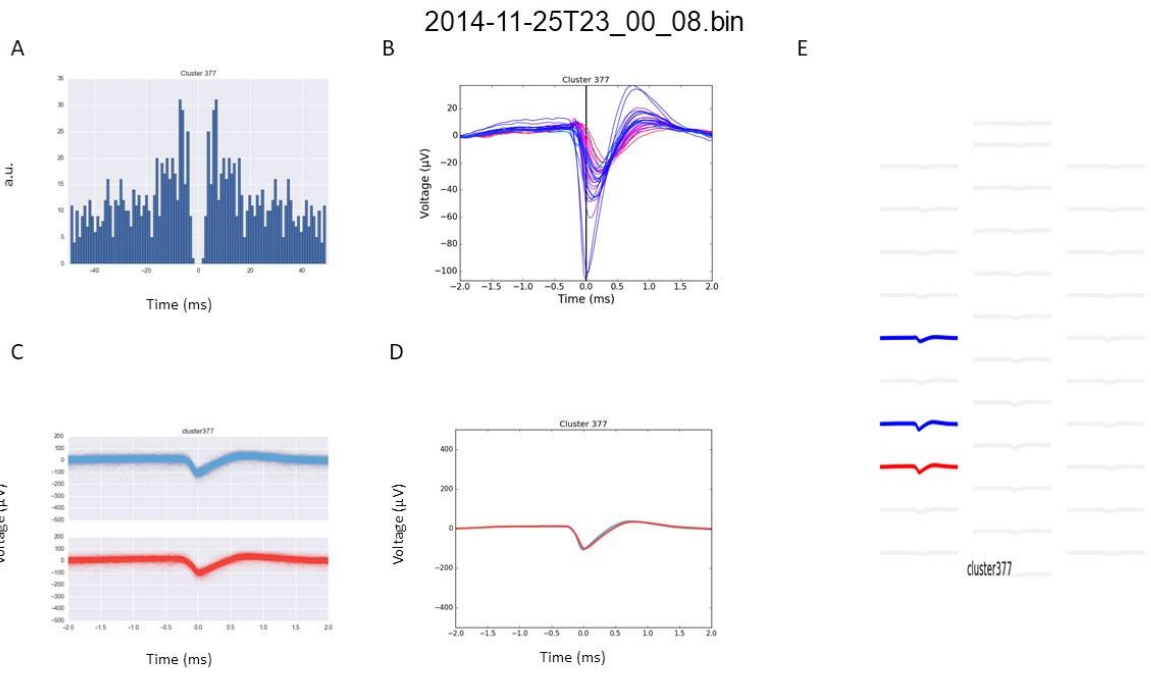

2017-02-02T14\_38\_11.bin

A

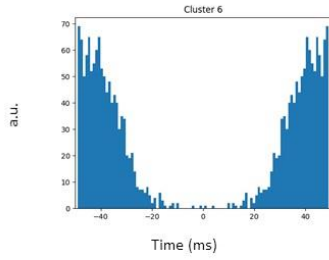

B

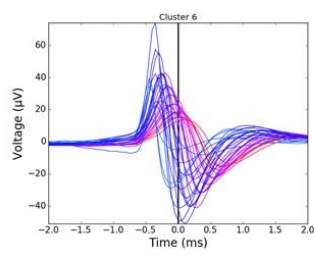

E

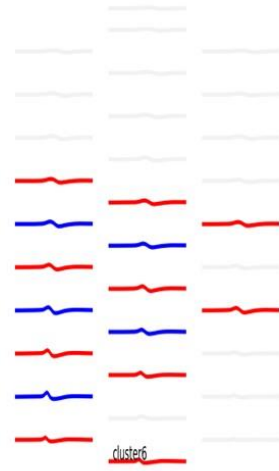

C

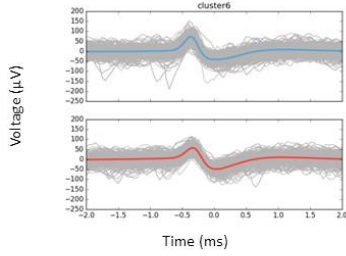

D

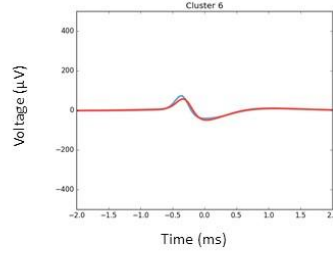

2017-02-02T15\_03\_44.bin

A

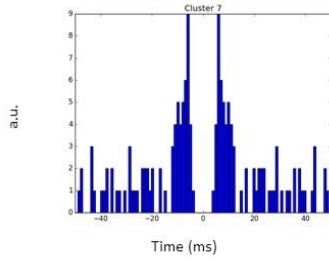

B

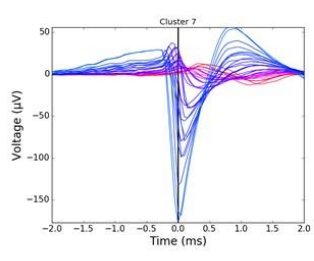

E

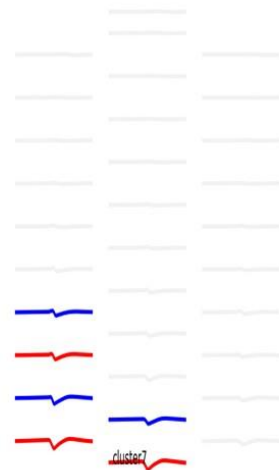

C

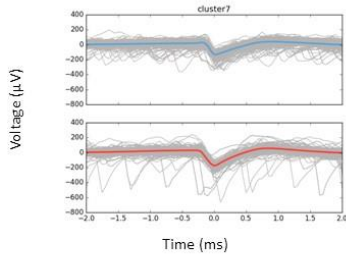

D

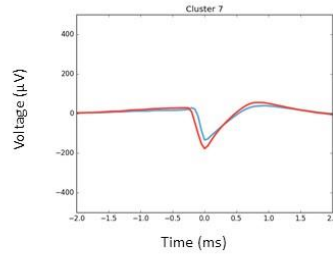

2017-02-02T15\_03\_44.bin

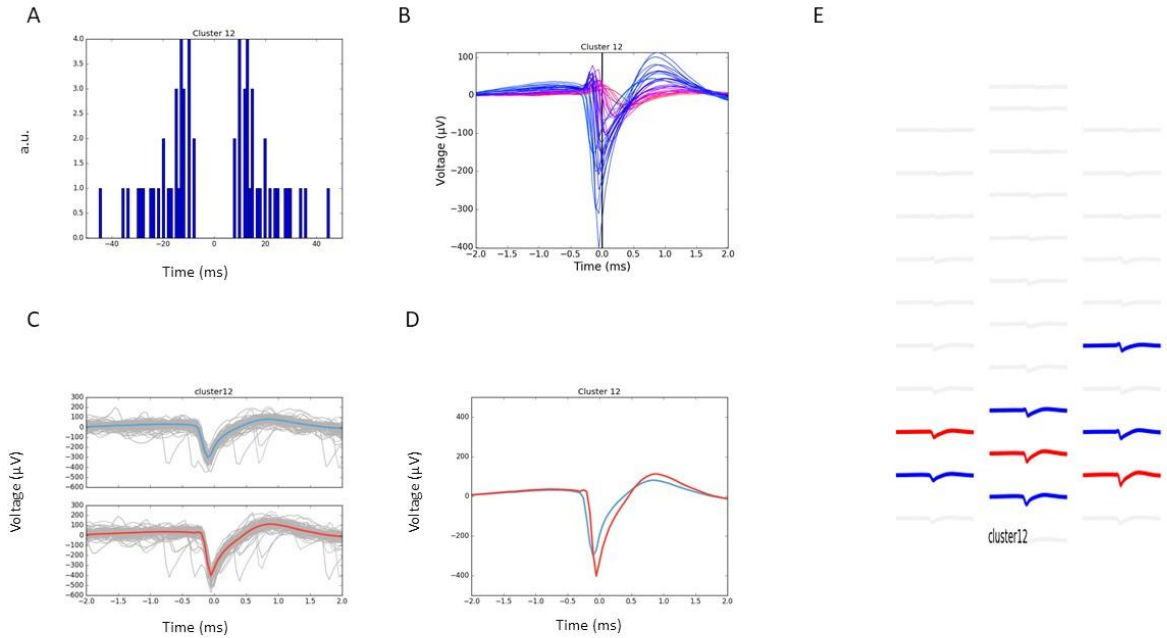

2017-02-02T15\_03\_44.bin

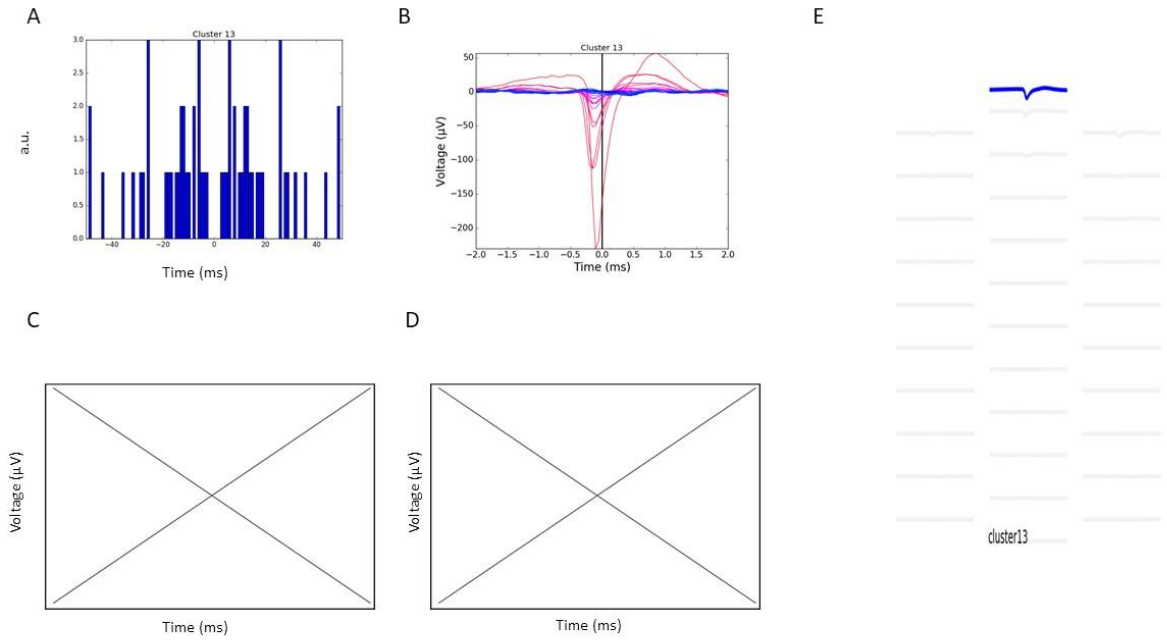

2017-02-02T15\_03\_44.bin

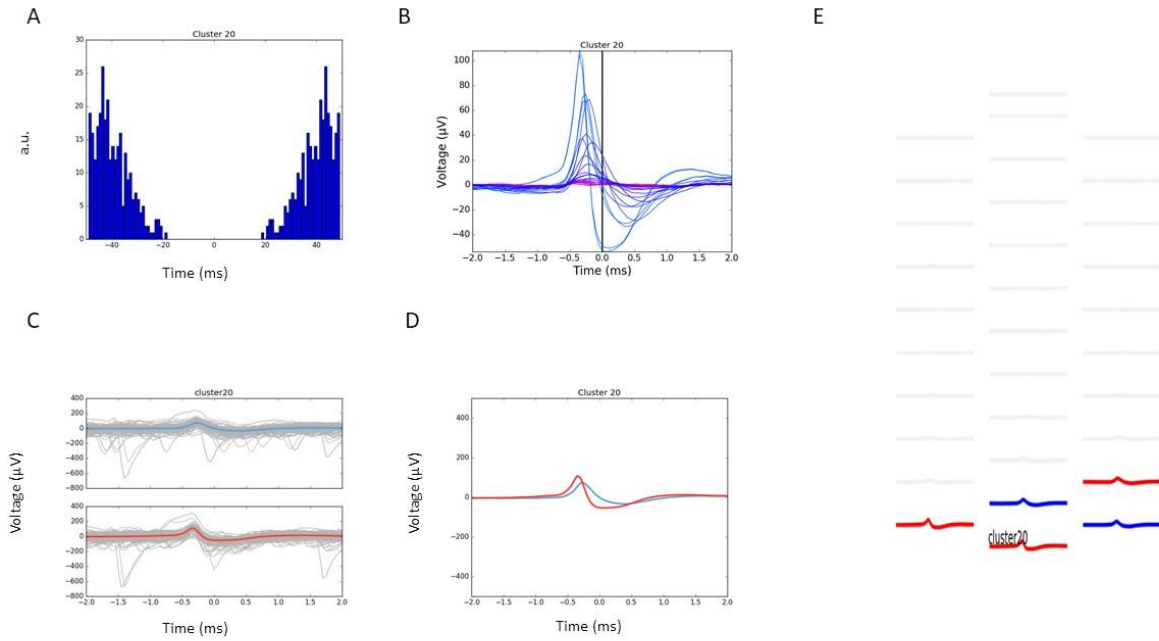

2017-02-02T15\_03\_44.bin

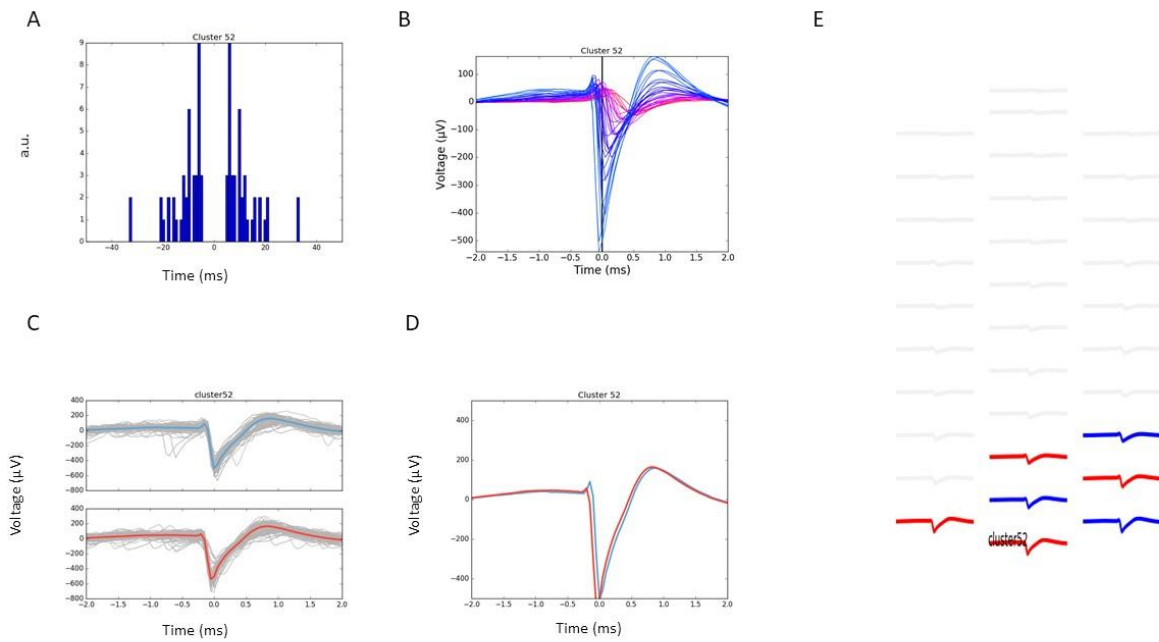

2017-02-02T15\_03\_44.bin

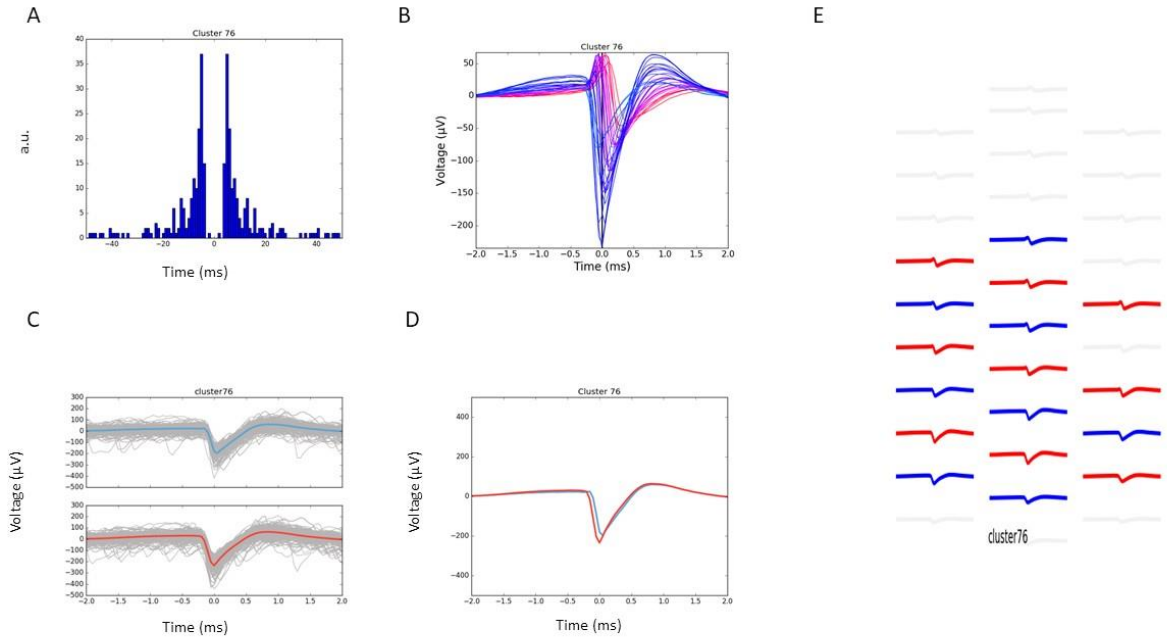

2017-02-02T15\_49\_35.bin

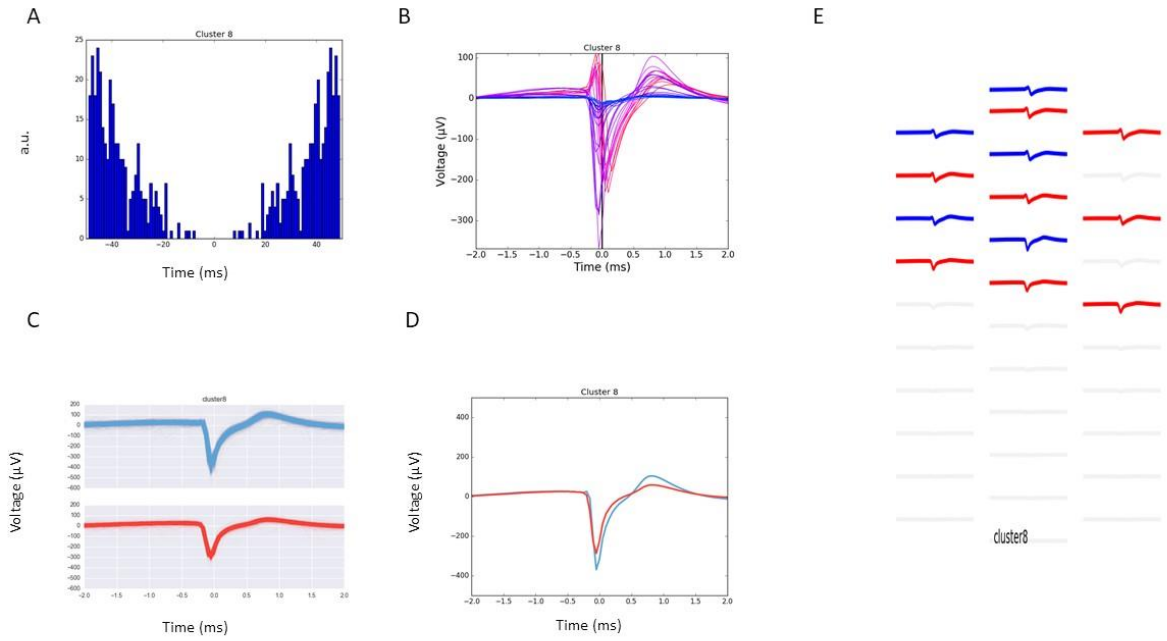



2017-02-02T15\_49\_35.bin

A

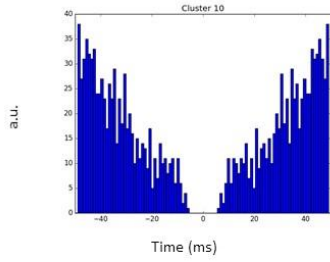

B

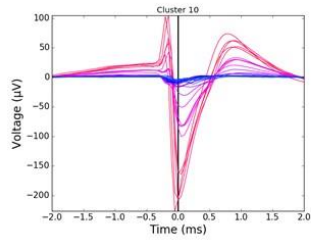

E

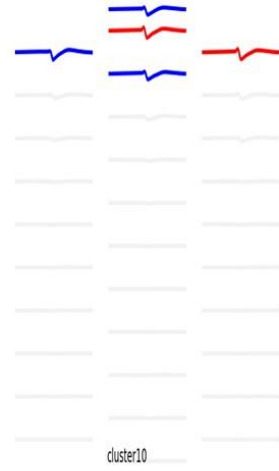

C

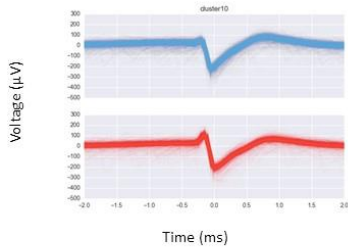

D

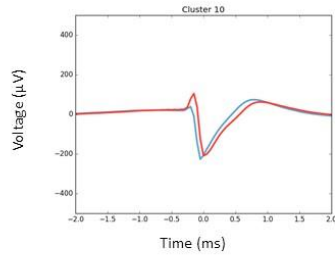

2017-02-02T15\_49\_35.bin

A

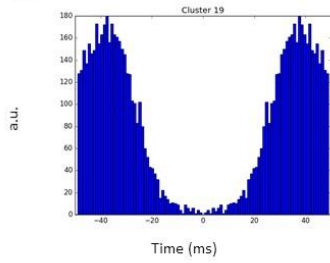

B

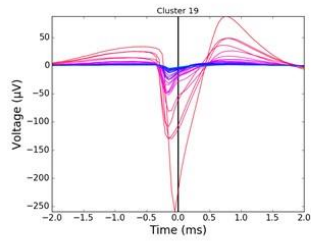

E

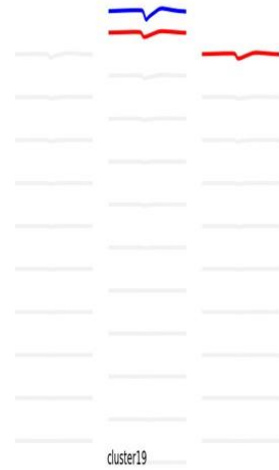

C

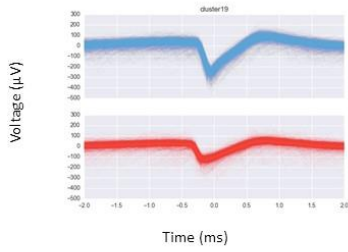

D

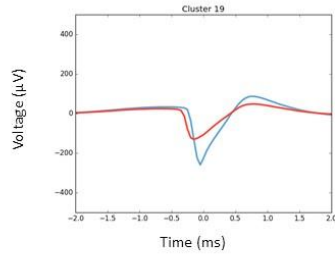

2017-02-02T15\_49\_35.bin

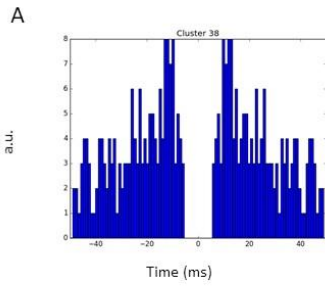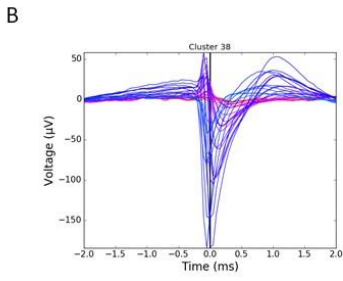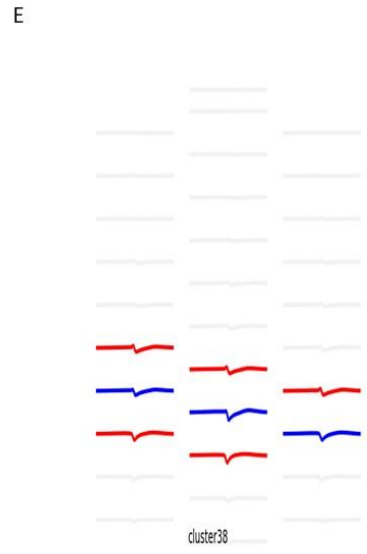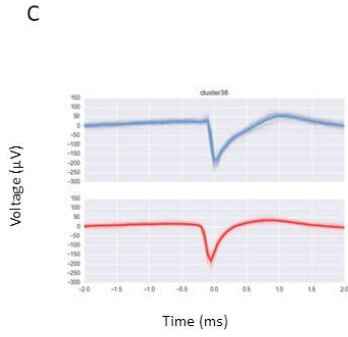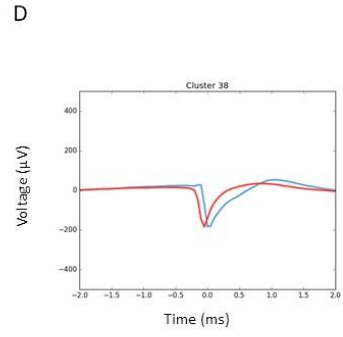

2017-02-02T15\_49\_35.bin

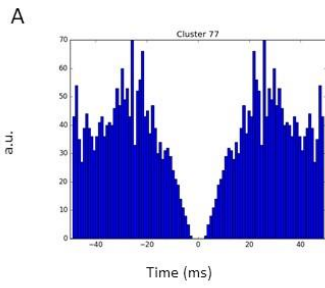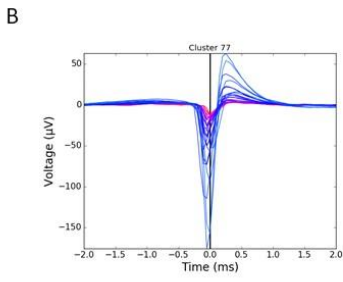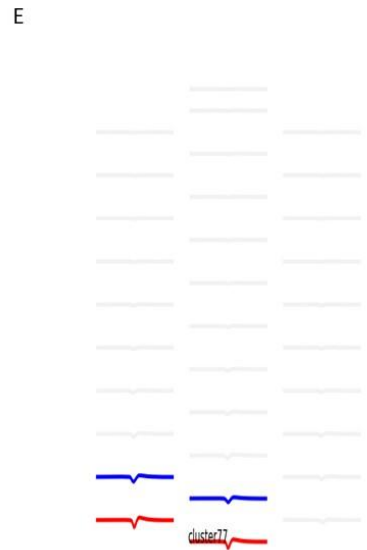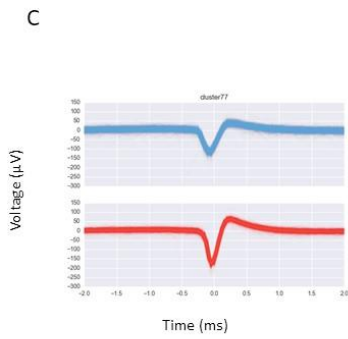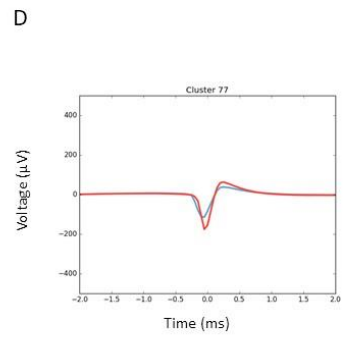

2017-02-02T16\_57\_16.bin

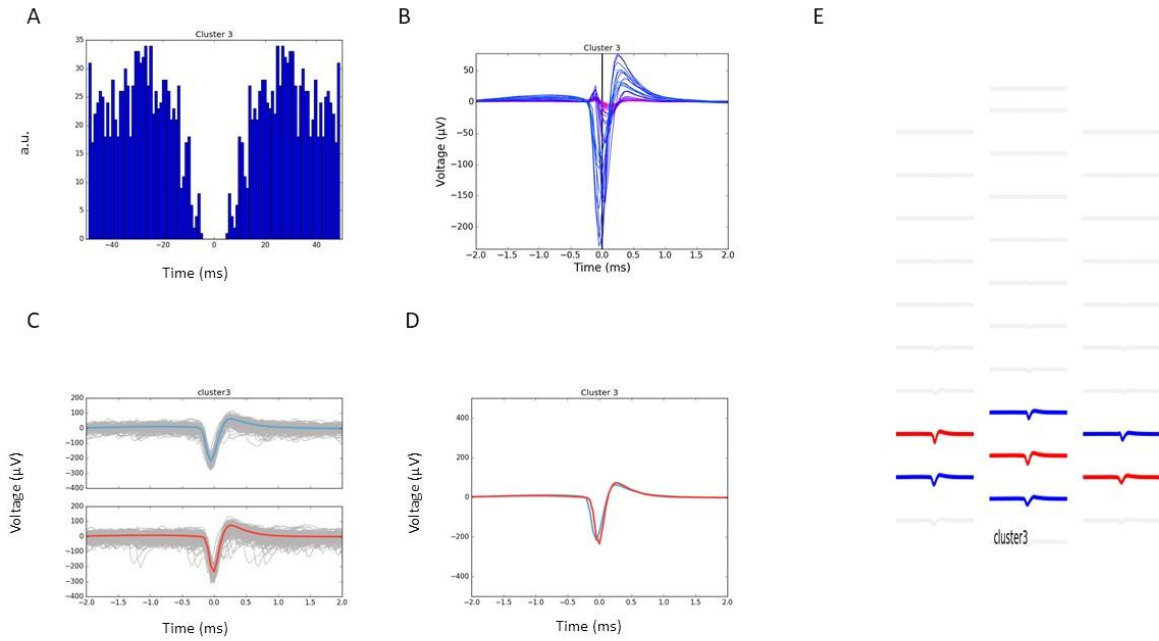

2017-02-02T16\_57\_16.bin

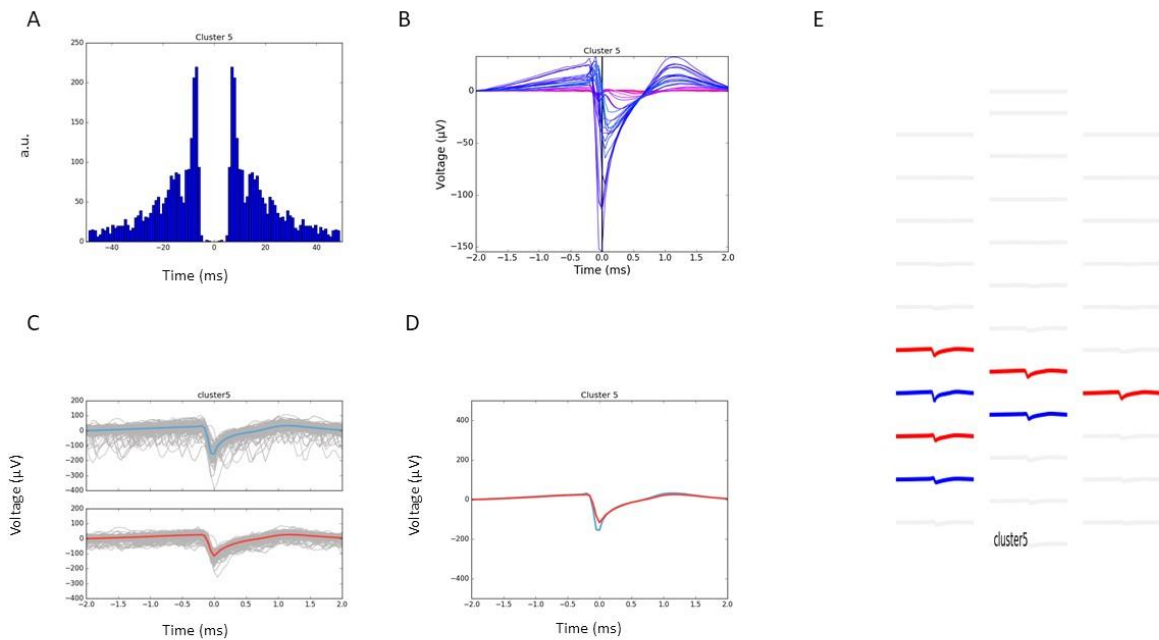

2017-02-02T16\_57\_16.bin

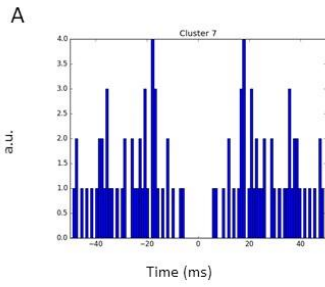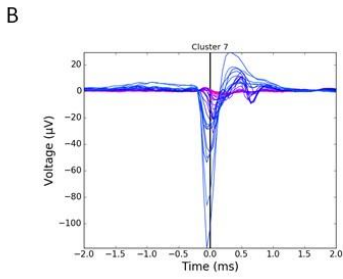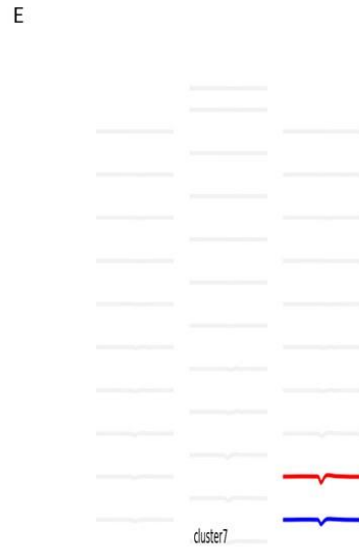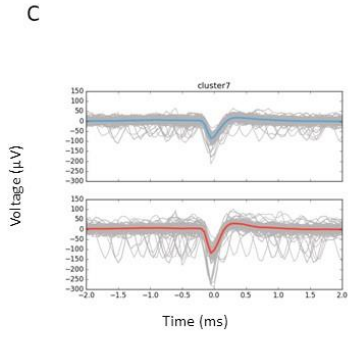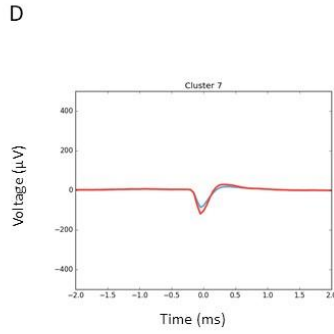

2017-02-02T16\_57\_16.bin

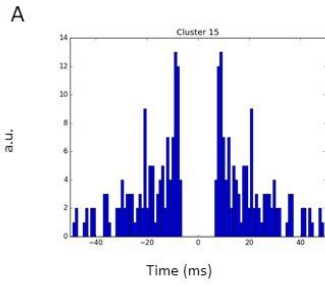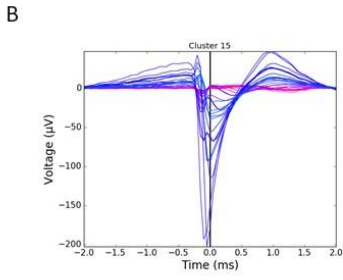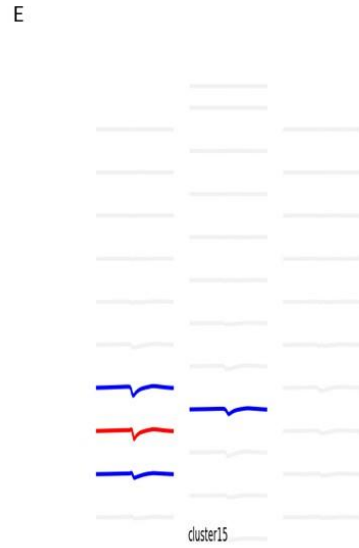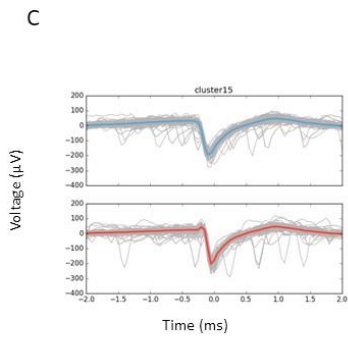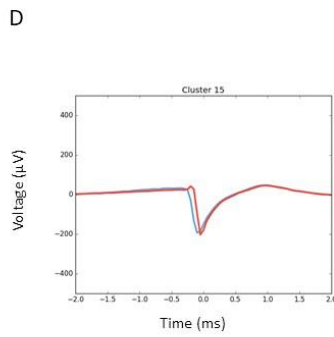

2017-02-02T16\_57\_16.bin

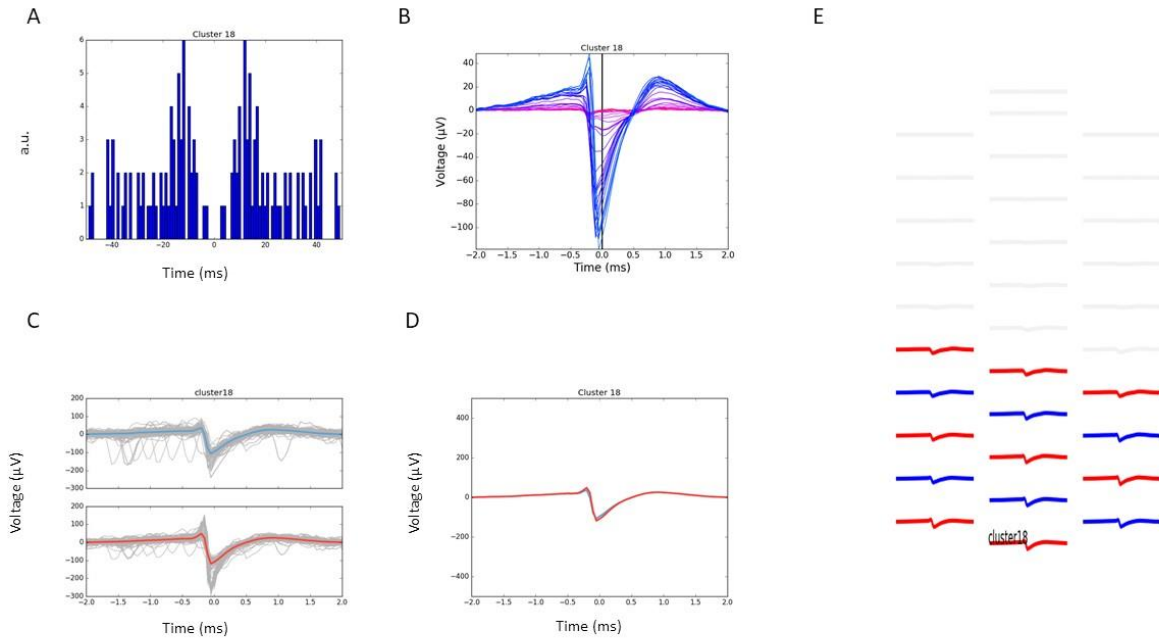

2017-02-02T16\_57\_16.bin

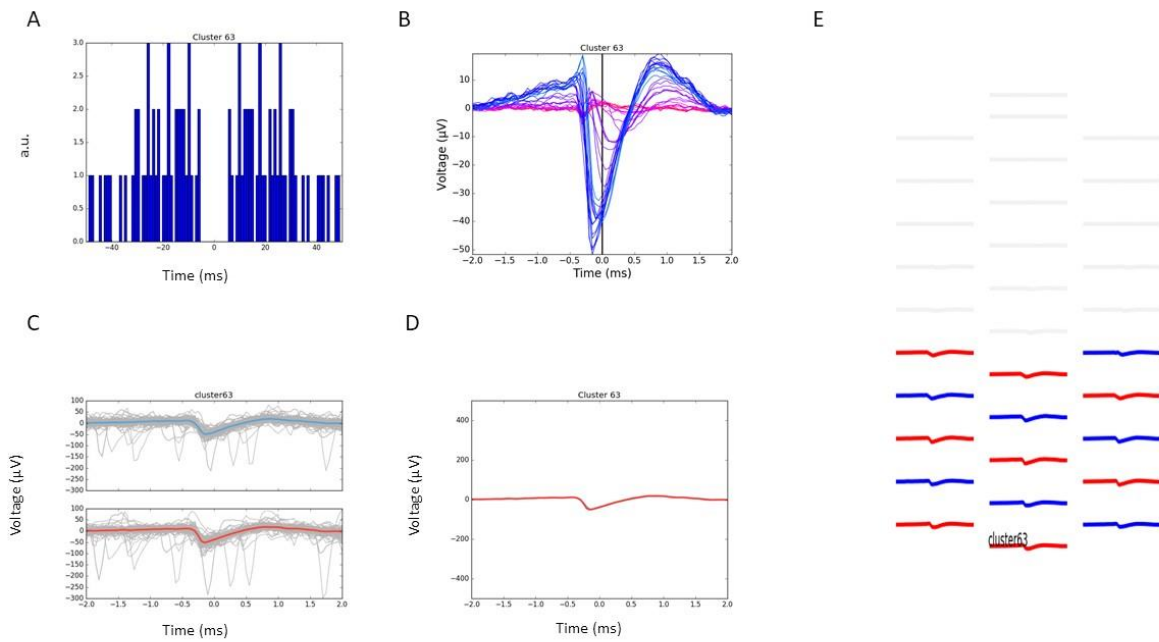

2017-02-02T17\_18\_46.bin

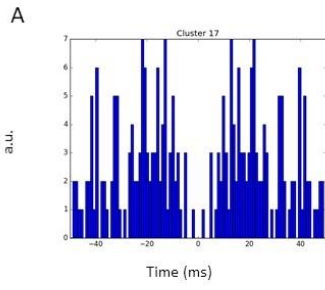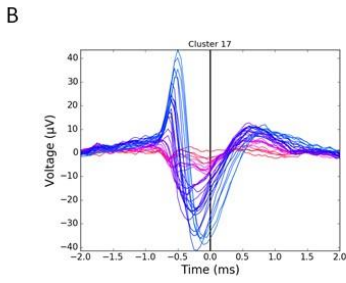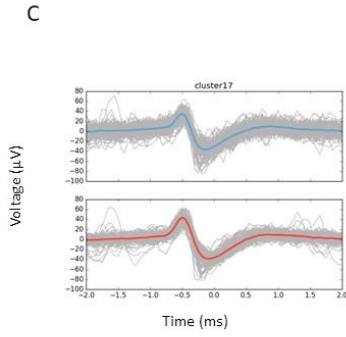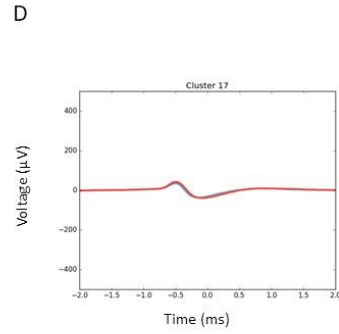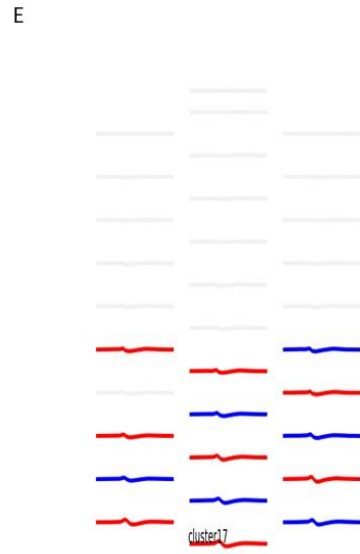

2017-02-02T17\_18\_46.bin

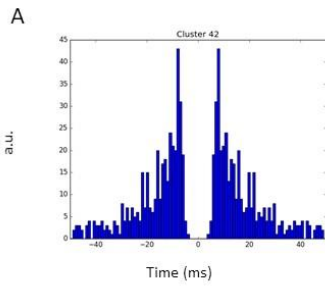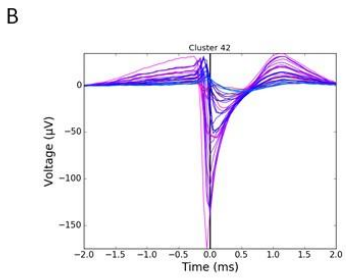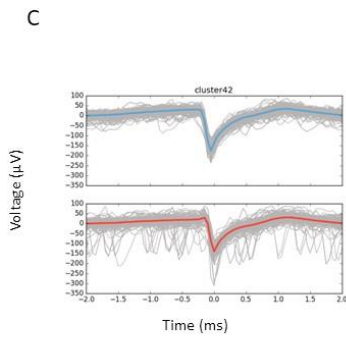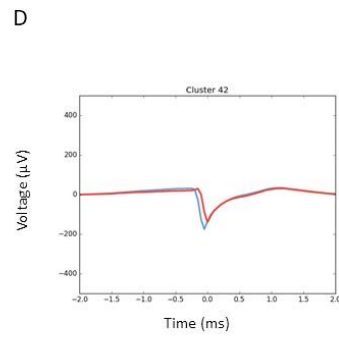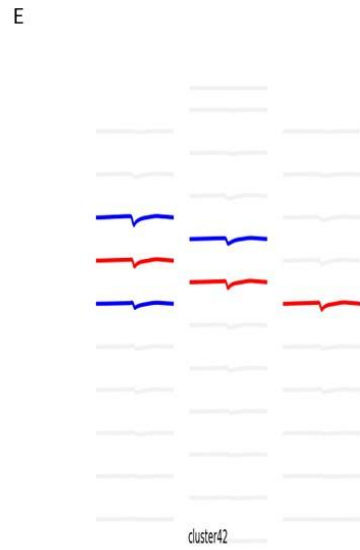

2017-02-02T17\_18\_46.bin

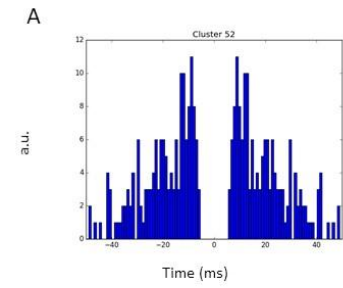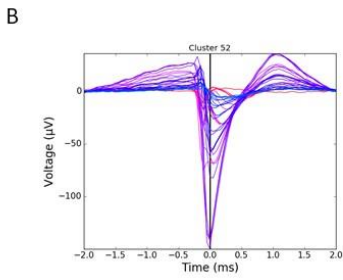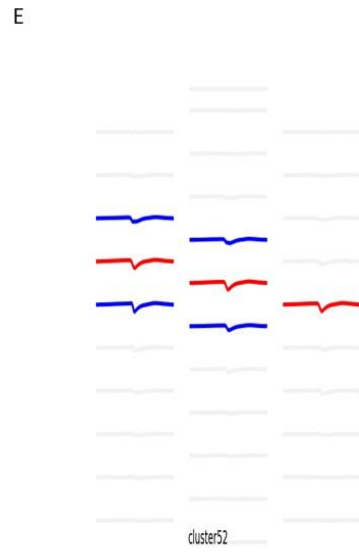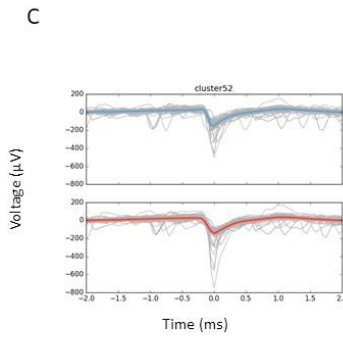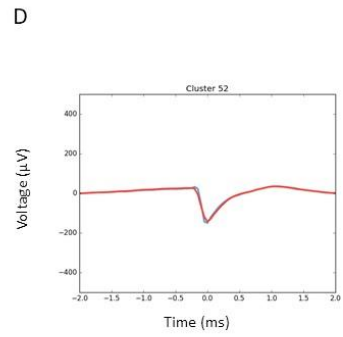

2017-02-02T17\_18\_46.bin

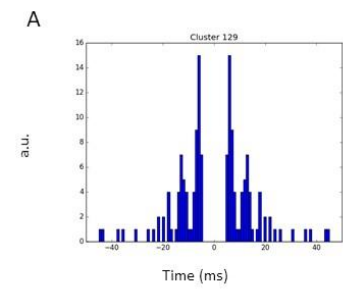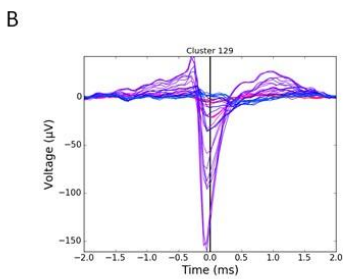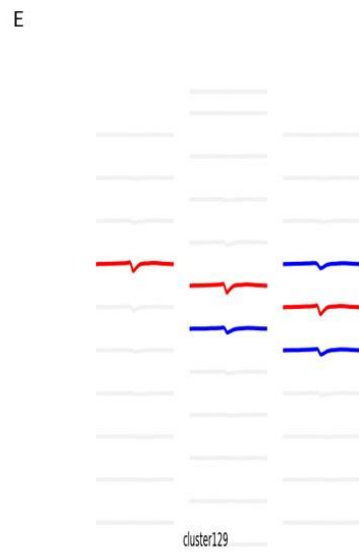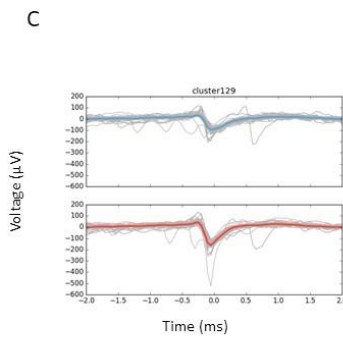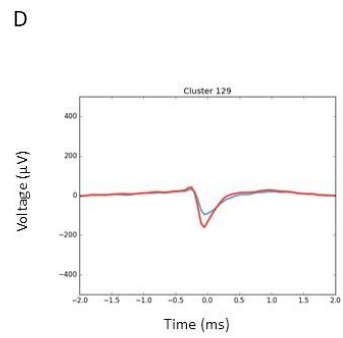

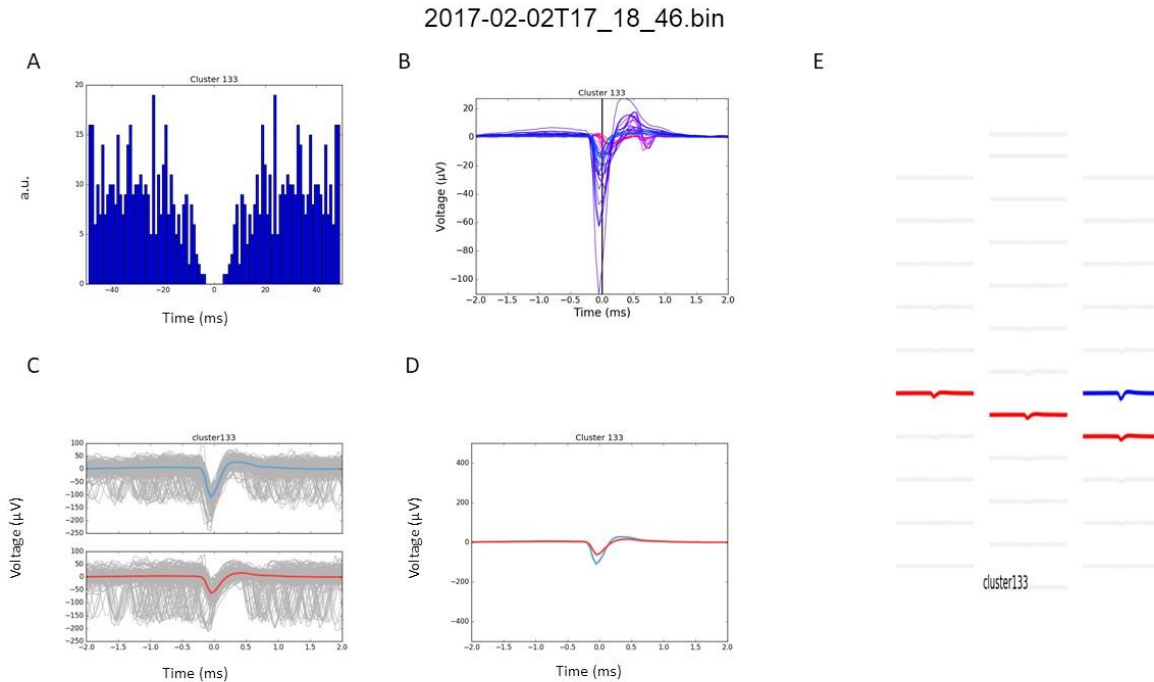

**Supplementary Figure 3.** Putative neurons ( $n=103$ ) sorted from all the recordings. For each neuron (also called cluster), the recording is identified on the top. **(A)** Autocorrelogram showing low interspike interval violations; **(B)** Extracellular average time courses for each channel are overlaid; **(C)-(D)** The pristine and PEDOT coated electrodes with the highest average peak-to-peak amplitudes are represented as blue and red, respectively; **(E)** A schematic of the polytrode with red and blue colored waveforms denoting the electrodes where the peak-to-peak average amplitude is higher than half of the maximum peak-to-peak average amplitude for this neuron. When only one electrode is present in this representation, **(C)** and **(D)** are not shown. ‘a.u.’ arbitrary units.



## Impedance spectroscopy

A

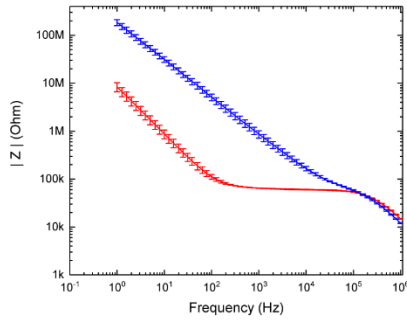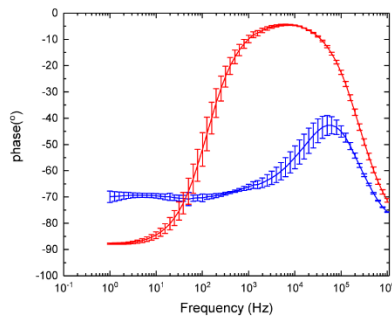

B

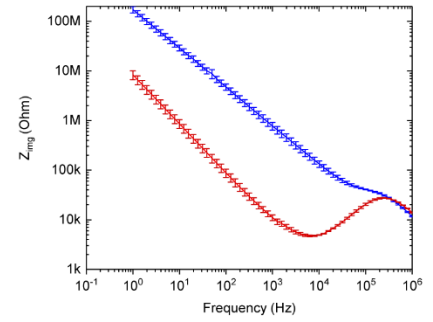

**Supplementary Figure 4.** Impedance spectroscopy of PEDOT-PSS ( $n = 3$ ) and pristine ( $n = 3$ ) electrodes, where red represent PEDOT coated electrodes and blue represent pristine electrodes. **(A)** Bode plot showing the impedance magnitude,  $|Z|$ , and phase angle; **(B)** The imaginary part of impedance.

**Thermal noise calculation**

Thermal noise is commonly believed to be one of the main contributors to the background noise in extracellular recordings [1]–[5]. The thermal noise is given by:

$$\sigma^{th} = \sqrt{4 k T \int_{f_1}^{f_2} Z_{real} df}$$

Where  $k$  is the Boltzmann's constant ( $1.38 \times 10^{-23}$  J/K),  $T$  is the temperature in degrees Kelvin,  $f_1$  and  $f_2$  are the lower and upper limits of the recording bandwidth in Hz, and  $Z_{real}$  is the real part of the impedance in the respective frequency bandwidth ( $f_1$  to  $f_2$ ). We assumed  $T = 293$  K and we used OriginPro 2017 software to integrate the  $Z_{real}$  in the 200-8000 Hz frequency band. The  $\sigma^{th}$  for pristine microelectrodes was 5.0  $\mu$ V and for coated microelectrodes was 2.8  $\mu$ V.

## Electrode impedance and attenuation of signal amplitude

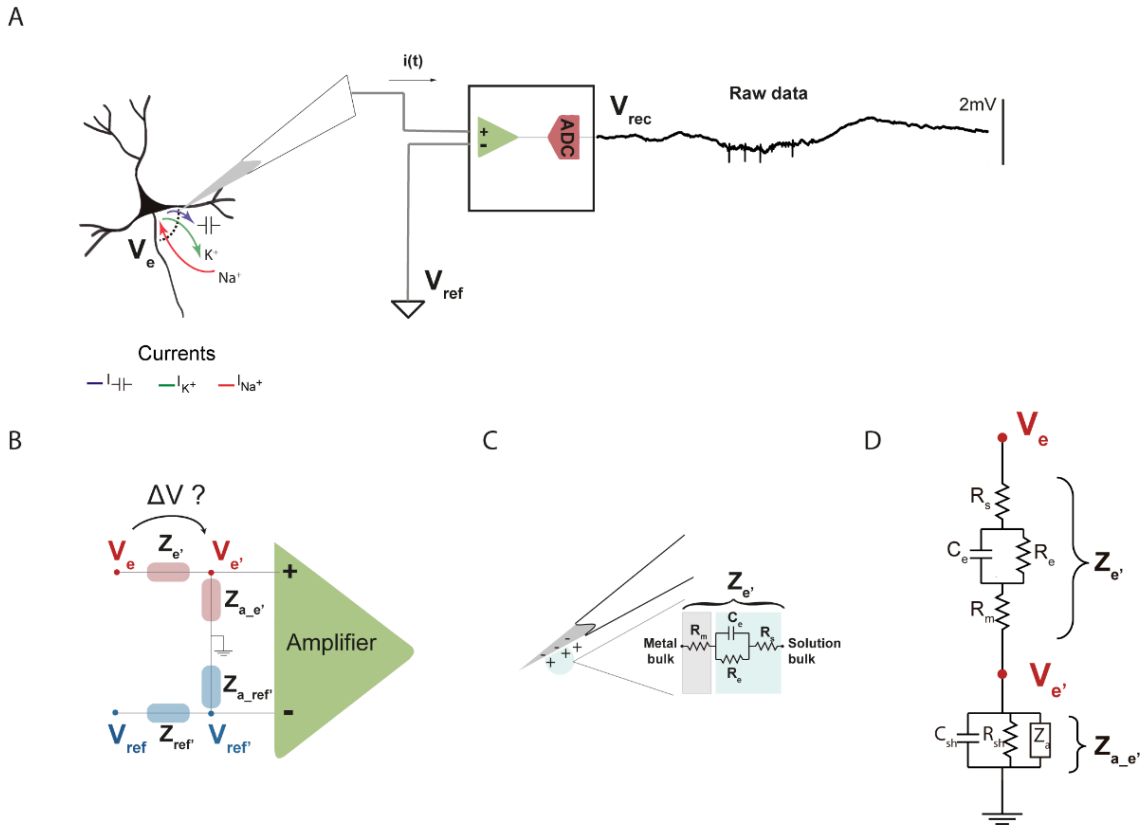

**Supplementary Figure 5.** Effect of electrode impedance on signal amplitude. **(A)** When a neuron is active, transient changes in its membrane cause currents (ionic and capacitive) to flow into and out of the cell. Each of these transmembrane currents superimpose in the extracellular medium, defining an electric potential ( $V_e$ ) that surrounds the active neuron [10]. Therefore, to detect the presence of an active neuron in the extracellular space, the electric potential  $V_e$  relative to some distant reference must be measured. The potentials  $V_e$  and  $V_{ref}$  are the potentials impressed at the microelectrode and reference, respectively. In an ideal extracellular recording system, the recorded voltage  $V_{rec}$ , will be equal to  $V_e - V_{ref}$ , and it will be the potential difference that would exist if the tip had no net current flowing into it [11]. Nonetheless, the recorded voltage  $V_{rec}$  relies on a recording system. The recording system is composed of the microelectrode(s), reference electrode, and the hardware connected to them, including amplifiers, filters, and analog-to-digital converter (ADC); **(B)** Simplified circuit diagram [6] for understanding the voltage drops and current pathways that occur in a recording system.  $Z_e$  and  $Z_{ref}$  represent the effective electrode impedance for recording and reference electrodes, respectively.  $Z_{a_e}$  represent the effective amplifier input impedance for the electrode and  $Z_{a_{ref}}$  the effective amplifier input impedance for the reference. Due to currents that flow to ground through the series combination of the effective electrode impedance  $Z_e$  and the effective amplifier input impedance  $Z_{a_e}$ , the potential difference measured by the amplifier ( $V_{e'} - V_{ref'}$ ) may differ from the true potential difference ( $V_e - V_{ref}$ ); **(C)** The electrical double layer at an electrode surface and equivalent circuit model of the interface of a metal microelectrode recording in the brain. When a metal is placed in a saline solution, two phenomena occur: water dipoles close to the metal surface become oriented, and assuming the metal surface is negatively charged, the solution

close to the metal surface become depleted of negative ions (anions), leaving behind a cloud of positive ions (cations). The resulting charge distribution - two narrow regions of equal and opposite charge - is known as the electrical double layer [12]. The effective electrode impedance ( $Z_{e'}$ ) is the sum of the resistance of the solution ( $R_s$ ), the resistance of the electrode metal ( $R_m$ ), and the resistance ( $R_e$ ) and capacitance ( $C_e$ ) of the double-layer that forms on the metal electrode-extracellular interface; **(D) Voltage divider:** the effective electrode impedance  $Z_{e'}$  is connected in series with the input amplifier impedance  $Z_{a_e'}$  which includes the actual input amplifier impedance and the shunting paths to ground outside the amplifier. The shunting routes to ground outside the amplifier are  $R_{sh}$  and  $C_{sh}$  [7]–[9]. This shunt capacitance arises mainly from the capacitance across the thin insulation isolating an electrode shaft and the surrounding electrolyte, as well as the cumulative capacitance along cables and connectors [11]. This route to ground, parallel to the amplifier, reduces the effective amplifier impedance, and being capacitive, this effect increases with signal frequency [9], [11], [13]. Therefore, the shunt capacitance should be small to create a large shunt impedance, especially when the electrodes have a large impedance [11], [13]. If  $Z_{a_e'}$  is not substantially larger than  $Z_{e'}$ ,  $V_{e'}$  will be less than  $V_e$ . Therefore, as long as the effective amplifier input impedance is much larger than the effective electrode impedance, the voltage drop in the electrode-extracellular interface is negligible and the potential difference at the amplifier inputs will reflect the actual difference in electric potential,  $V_e - V_{ref}$ .

## Amplitude of action potentials

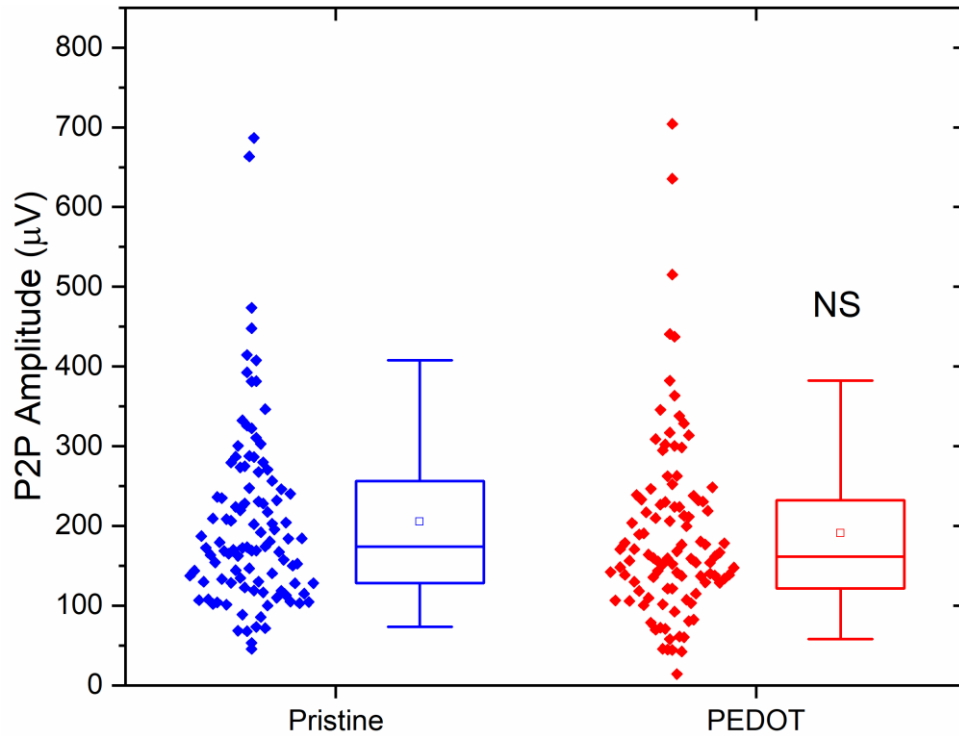

**Supplementary Figure 6.** Effect of electrode impedance on spikes amplitude. For each of the 103 putative neurons sorted from 11 recordings, the maximum average peak-to-peak (P2P) amplitudes from the pristine and PEDOT electrode groups were plotted. The P2P amplitude values are represented in scatterplots, and boxplots show the distribution of these values. In the boxplots, line: median, square: mean, box: 1st quartile–3rd quartile, and whiskers: 1.5 x interquartile range above and below the box. ‘NS’ not significant ( $p > 0.05$ ) when compared with pristine electrodes.

## References

- [1] S. A. Desai, J. D. Rolston, L. Guo, and S. M. Potter, “Improving impedance of implantable microwire multi-electrode arrays by ultrasonic electroplating of durable platinum black,” *Front. Neuroeng.*, vol. 3, no. May, p. 5, 2010.
- [2] A. Hassibi, R. Navid, R. W. Dutton, and T. H. Lee, “Comprehensive study of noise processes in electrode electrolyte interfaces,” *J. Appl. Phys.*, vol. 96, no. 2, pp. 1074–1082, Jul. 2004.
- [3] M. O. Heuschkel, M. Fejtl, M. Raggenbass, D. Bertrand, and P. Renaud, “A three-dimensional multi-electrode array for multi-site stimulation and recording in acute brain slices,” *J. Neurosci. Methods*, vol. 114, no. 2, pp. 135–148, 2002.
- [4] J. B. Johnson, “Thermal Agitation of Electricity in Conductors,” *Phys. Rev.*, vol. 32, no. 1, pp. 97–109, Jul. 1928.
- [5] H. Nyquist, “Thermal Agitation of Electric Charge in Conductors,” *Phys. Rev.*, vol. 32, no. 1, pp. 110–113, Jul. 1928.
- [6] T. C. Ferree, P. Luu, G. S. Russell, and D. M. Tucker, “Scalp electrode impedance, infection risk, and EEG data quality,” *Clin. Neurophysiol.*, vol. 112, no. 3, pp. 536–544, Mar. 2001.
- [7] G. Baranauskas, E. Maggiolini, E. Castagnola, A. Ansaldo, A. Mazzoni, G. N. Angotzi, A. Vato, D. Ricci, S. Panzeri, and L. Fadiga, “Carbon nanotube composite coating of neural microelectrodes preferentially improves the multiunit signal-to-noise ratio,” *J. Neural Eng.*, vol. 8, no. 6, p. 66013, Oct. 2011.
- [8] S. F. Lempka and C. C. McIntyre, “Theoretical Analysis of the Local Field Potential in Deep Brain Stimulation Applications,” *PLoS One*, vol. 8, no. 3, p. e59839, Mar. 2013.
- [9] M. J. Nelson, P. Pouget, E. A. Nilsen, C. D. Patten, and J. D. Schall, “Review of signal distortion through metal microelectrode recording circuits and filters,” *J. Neurosci. Methods*, vol. 169, no. 1, pp. 141–157, Mar. 2008.
- [10] G. T. Einevoll, C. Kayser, N. K. Logothetis, and S. Panzeri, “Modelling and analysis of local field potentials for studying the function of cortical circuits,” *Nat. Rev. Neurosci.*, vol. 14, no. 11, pp. 770–85, Oct. 2013.
- [11] D. A. Robinson, “The electrical properties of metal microelectrodes,” *Proc. IEEE*, vol. 56, no. 6, pp. 1065–1071, 1968.
- [12] R. Musa, “Design, fabrication and characterization of a neural probe for deep brain stimulation and recording,” 2011.
- [13] M. E. J. Obien, K. Deligkaris, T. Bullmann, D. J. Bakkum, and U. Frey, “Revealing neuronal function through microelectrode array recordings,” *Front. Neurosci.*, vol. 8, no. JAN, p. 423, Jan. 2015.
